# Eye Development and Photoreceptor Differentiation in the Cephalopod *Doryteuthis pealeii*

Kristen M. Koenig<sup>1,4,5</sup>, Peter Sun<sup>1</sup>, Eli Meyer<sup>2</sup> and Jeffrey M. Gross<sup>1,3,5</sup>

<sup>1</sup>Department of Molecular Biosciences, Institute for Cellular and Molecular Biology, University of Texas at Austin, Austin, TX 78712, United States

<sup>2</sup>Department of Zoology, Oregon State University, Cordley Hall 3029, Corvallis, OR, 97331, United States

<sup>3</sup> Current address: Eye and Ear Institute, Charles and Louella Snyder Laboratory for Retinal Regeneration, Department of Ophthalmology, Louis J. Fox Center for Vision Restoration, University of Pittsburgh School of Medicine, Pittsburgh PA 15213 United States

<sup>4</sup> Current address: FAS Center for Systems Biology, Harvard University, Northwest Labs 365.10, 52 Oxford Street, Cambridge, MA 02138, United States

<sup>5</sup> For correspondence:

grossjm@pitt.edu  
412-383-7325

or

kmkoenig@gmail.com

**Keywords:** squid, eye evolution, Lophotrochozoa, cephalopod

**Summary Statement:**

Histological, transcriptomic and molecular characterization of eye development in the squid *Doryteuthis pealeii* reveal conserved and convergent mechanisms underlying the evolution of complex eye formation in the Lophotrochozoa.

## **Abstract**

Photoreception is a ubiquitous sensory ability found across the Metazoa, and photoreceptive organs are intricate and diverse in their structure. While the morphology of the compound eye in *Drosophila* and the single-chambered eye in vertebrates have elaborated independently, the amount of conservation within the “eye” gene regulatory network remains controversial with few taxa studied. To better understand the evolution of photoreceptive organs, we established the cephalopod, *Doryteuthis pealeii*, as a lophotrochozoan model for eye development. Utilizing histological, transcriptomic and molecular assays we characterize eye formation in *Doryteuthis pealeii*. Through lineage tracing and gene expression analyses, we demonstrate that cells expressing Pax and Six genes incorporate into the lens, cornea and iris, and the eye placode is the sole source of retinal tissue. Functional assays demonstrate that Notch signaling is required for photoreceptor cell differentiation and retinal organization. This comparative approach places the canon of eye research in traditional models into

perspective, highlighting complexity as a result of both conserved and convergent mechanisms.



## **Introduction**

In *On the Origin of Species*, Darwin marveled at the capacity of natural selection to produce the eye as an “organ of extreme perfection and complication” (Darwin, 1859). It is the exacting intricacy of photoreceptive organs that provides an elegant system to study the emergence of complexity. The capacity for photoreception is a sensory tool evolved early in the Metazoa (Schnitzler, 2012). The extent of this capacity ranges from single photoreceptor cells, pigmented eyespots and cups, to complicated organs that focus, reflect and absorb light to resolve images (Land and Fernald, 1992). In the Bilateria, high-resolution vision is known to have evolved in only a few animal groups including vertebrates, arthropods and cephalopods (Nilsson, 2013). The arthropod eye is a compound eye composed of many individual ommatidial units containing multiple photoreceptor cells and a lens. Both the vertebrate and the cephalopod eye are single-chambered, with a single lens at the anterior of the eye and a cup shaped retina in the posterior. Despite the use of a similar optical strategy, these two eye structures have independently evolved (Fernald, 2006).

The incredible diversity in eye shape and photoreceptor cell structure in animals led Salvini-Plawen and Mayr to conclude that the eye had evolved independently 40 to 65 times (Salvini-Palwen and Mayr, 1977). With the expansion of molecular tools, however, extensive genetic analyses in *Drosophila* and vertebrates demonstrated that many orthologous genes and signaling pathways are necessary for eye formation. The Pax-Six-Eya-Dach network (also known as the Retina Determination Network; RDN) occupies the nexus of this genetic homology. *Eyeless*, *twin of eyeless* (Pax6 ortholog), *sine oculis* (Six1 and Six2 ortholog), *eya*, and *dac* (Dach ortholog) are all necessary for eye development in *Drosophila* (Reviewed in Kumar, 2010). They each can induce ectopic eye formation when mis-expressed in the antennal imaginal disc. In vertebrates, Pax6, Six3 and Six6 (*optix* homologs), Eya1, Eya2, Eya3 and Dach1 are each known to play a role in eye development. Among these, Pax6, Six3 and Eya3 can also induce ectopic retina and lens formation when mis-expressed in vertebrates (Reviewed in Tomarev, 1997b; Arendt, 2003; Nilsson, 2004; Kumar, 2010; Wagner, 2014).

The Notch signaling pathway also plays essential roles during retina and lens formation in vertebrates and *Drosophila*. Notch activity regulates cell cycle progression within retina and lens, and regulation of Notch activity is necessary for maintenance of progenitor cell populations (Livesey, 2001; Charlton-Perkins, 2011a). In vertebrates, retinal progenitor cells deficient in Notch signaling prematurely exit the cell cycle which results in a smaller retina and a higher proportion of early born cell types (Tomita, 1996; Dorsky et al., 1997). In *Drosophila*, loss of Notch signaling reduces imaginal disc proliferation and can lead to a smaller eye (Cagan, 1989; Go, 1998). Notch also regulates photoreceptor cell fate and ommatidial polarity (Blair, 1999).

This extensive amount of similarity has led many to conclude that all photoreceptive organs have a shared ancestry (Halder, 1995; Gehring, 1996, 1999, 2005; Tomarev, 1997b). Others suggest that, despite the inclusion of the same gene families, the regulatory networks underlying eye development in vertebrates and *Drosophila* are fundamentally different in their connectivity, and are therefore likely to have evolved independently (Wagner, 2014). To address the homology of photoreceptive organs in the

Bilateria, and to better recognize the novelty found in each of these systems, it is necessary to understand the functional relationships between these genes in taxa beyond *Drosophila* and vertebrate models. A comparative approach that includes lophotrochozoan species sheds light on shared molecular mechanisms that operate during organ formation and informs an understanding of the conservation of regulatory modules throughout the Bilateria.

The squid *Doryteuthis pealeii* is a tractable lophotrochozoan model for studying complex eye development and understanding these networks. Cephalopods have the largest and most complex invertebrate nervous system and *Doryteuthis pealeii* has long been the subject of neurobiological and neurophysiological research (e.g. Hodgkin, 1949, 1952a, 1952b, 1952c; Vale, 1985a, 1985b; Brady, 1982; Allen, 1982). Moreover, adult neuroanatomy of multiple cephalopod species has been well described (Young, 1962a, 1962b, 1971; Nixon and Young, 2003; Wild, 2015). Despite these elegant studies, gene expression is just now being explored during development, and detailed molecular and genomic analyses of cephalopod organogenesis are in their

infancy (Tomarev, 1997a; Hartmann, 2003; Lee, 2003; Baratte, 2007; Farfan, 2009; Navet, 2009; Buresi, 2012; Ogura, 2013; Buresi, 2013; Focareta, 2014; Peyer, 2014; Wollesen, 2014; Yoshida, 2014; Shigeno, 2015; Wollesen, 2015; Buresi, 2016). The cephalopod eye is a single-chambered eye generated from an internalization of the optic placode (Gilbert, 1990). The single lens is produced by populations of specialized lentigenic cells and is located at the anterior of the eye (West 1994, 1995). The retina, composed of rhabdomeric photoreceptor cells and a support cell layer, is located at the posterior of the eye (Zonana, 1961; Wild, 2015). Photoreceptor outer segments are arrayed anteriorly and thus, are the first region of the retina to be exposed to light. This differs from the vertebrate eye where light must traverse the retina prior to interacting with photoreceptors. In the cephalopod, photoreceptor nuclei are located at the posterior of the retina, and photoreceptor axons form a plexiform layer behind this nuclear layer, exiting the eye and synapsing directly on the optic lobe (Young, 1971; Wild, 2015). General descriptions of eye development in various cephalopod species have been documented, but an in-depth molecular and cellular understanding of major morphogenetic

and cell differentiation events is lacking (Arnold, 1965, 1966, 1967, 1976; Gilbert, 1990; Marthy, 1973; Yamamoto, 1985a, 1985b; Naef, 1928). Recently the cephalopod genomic infrastructure was greatly improved by publication of the *Octopus bimaculoides* genome and a few transcriptomic databases (Albertin, 2015; Alon, 2015; Yoshida, 2011; Wollesen, 2014; Bassaglia, 2012). Despite these improvements however, few sequencing efforts have informed our understanding of embryonic development or organogenesis.

Here, we utilize a variety of histological, transcriptomic and molecular assays to identify developmental landmarks of eye formation in *D. pealeii*. This lophotrochozoan resource demonstrates the power of comparative developmental biology and begins to unravel mechanisms underlying the emergence of eye complexity. For example, despite the independent origin of the cephalopod lens, many orthologous transcription factors involved in lens development in *Drosophila* and vertebrates are expressed in lens progenitor cells of the cephalopod, underscoring that transcriptional cascades are often convergent in their functions across the Bilateria. We also demonstrate that Notch maintains a progenitor pool in the cephalopod retina, as it does in

vertebrates and *Drosophila*. This is the first evidence that Notch may be acting in a conserved manner in the context of a pseudostratified neuroepithelium in the Lophotrochozoa. Ultimately, this highlights a possible common cellular mechanism to generate neuronal diversity in neuroepithelia within the Bilateria.

## **Results**

### **Morphogenesis, Growth and Patterning of the Cephalopod Eye**

To provide a foundation to build a molecular and cellular understanding of eye development in *D. pealeii*, it was necessary to generate a detailed histological description of eye formation. All staging nomenclature follows (Arnold, 1965). Eye development commences at Stage 16 with the formation of bilateral placodes shortly before epiboly is complete (Fig.1). Beginning at stage 18, these placodes are internalized when a lip of cells forms around the periphery of the placode and progressively closes, fusing centrally at Stage 21 to form the optic vesicles (Fig.2, Fig.S1) (Gilbert, 1990; Marthy, 1973). Once the vesicle is closed, the eye continues to grow and the retina begins to curve. At Stage 22, cells at the anterior of the vesicle begin to differentiate into the primary and secondary lentigenic cells, which project cellular processes that form the segmented extracellular lens (Fig.3A,4; Arnold, 1967; West, 1995). These cells have a distinct nuclear architecture and are enriched in filamentous actin (Fig.2,3B,4). At hatching (post-Stage 29), the



retina is primarily composed of two cell types: photoreceptors and glial-like support cells (Young, 1971).

Between Stage 18 and Stage 26, the neuroepithelium appears as a single layer with no obvious morphological distinction between photoreceptors and glial-like support cells. At Stage 27 photoreceptor nuclei in the posterior retina begin to segregate to the basal side of the epithelium. This segregation initiates asymmetrically behind the basal membrane, suggesting a progressive wave of differentiation moving from the posterior of the animal to anterior (Fig.2,3C,4; Yamamoto, 1985). Photoreceptors penetrate the basal membrane, extending through the support cell layer, forming outer segments on the apical side of the retina. Outer segments are prominently labeled with phalloidin. Photoreceptors synapse directly on the optic lobe (Young, 1971; Wild, 2015). At hatching, the eye is functional (Gilbert, 1990).

The apical side of the retinal neuroepithelium faces anteriorly, and progenitor cells consistently undergo mitosis on the apical side of the retina (Fig.2,3C,4) similar to neuroepithelia in other organisms (Baye, 2008). To determine the pattern of progenitor cell cycle exit in the retina, we performed

a series of BrdU incorporation assays. All cells of Stage 19 to 25 retinae incorporate BrdU (Fig.5A-D). At Stage 25, two populations of BrdU<sup>+</sup> cells are detected (Fig.5D). Cells on the basal side of the retina incorporate BrdU, as expected if they are in S-phase during the exposure window. Mitotic cells on the apical side of the retina are also BrdU<sup>+</sup>, suggesting that they passed through S-phase earlier in the exposure window. At Stage 27, once photoreceptor nuclei have migrated behind the basal membrane, they no longer incorporate BrdU, suggesting that they are not proliferative (Fig.5E-G). Interestingly, the support cell layer continues to incorporate BrdU until at least two days post-hatching (Fig.5G), and nuclei are observed crossing from one side of the basal membrane to the other (Fig.4). Without *in vivo* tracking, it is unknown whether these nuclei move from support cell layer to the photoreceptor cell layer across the basal membrane, or vice versa. However, given the lack of BrdU incorporation by nuclei on the photoreceptor side of the basal membrane and the rapid growth of the eye after hatching, newly generated photoreceptors may arise from support cell layer-derived cells.

Apoptosis contributes significantly to eye formation in vertebrates and *Drosophila* and we were interested if cell death played a role in eye morphogenesis in squid (Baker, 2001; Vecino, 2004). Surveys for apoptosis, using TUNEL as a marker, did not reveal an appreciable level of apoptotic cells during eye development (Fig. 6).

### **Lineage Tracing of the Eye Placode and Surrounding Tissues Identifies Retina, Lens and Brain Progenitors**

Previous studies suggested fates for specific populations of cells in and around the eye placode of various cephalopod species, but no detailed lineage tracing study exists (Yamamoto, 2003; Marthy, 1987). These data are critical to correlate gene expression data with distinct fates in the eye and compare neurogenesis between cephalopods and other systems. With this in mind, we generated a fate map of the eye placode and surrounding tissue. Populations of cells were labeled with DiI at Stage 18 (Fig.7A,B), immediately documented (Fig.7C), and embryos were grown to hatching stage, at which point they were fixed and photographed (Fig.7D). A subset were sectioned

and imaged by confocal microscopy (Fig.7E). 246 embryos were labeled and scored as whole-mounts, and 74 were sectioned and imaged. Representative examples of whole-mount and section data are presented in Figure 8. Lineage tracing confirmed some previously identified cell contributions to eye and brain lobe primordia, but also identified new progenitor populations (Yamamoto, 2003). Cells labeled within the placode were found primarily in the retina, and placode cells were the only cells that contributed to the retina (Fig.8A,G). Punctate label from placode cells was also detected in the optic lobe, primarily in the plexiform layer. While this can likely be attributed to transfer along photoreceptor axons, the possibility that placode cells incorporate into the optic lobe cannot be discounted. Interestingly, cells at the lip of the placode incorporated only into lens and iris tissue (Fig.8B,H). These data suggest that the cephalopod eye is composed entirely of cells derived from these two neighboring tissues: the placode and placode lip.

Optic lobe primordia cells are located dorsal and lateral to the placode. The cells labeled in the more medial portion of this optic lobe-fated region also incorporate into the anterior chamber organ (Fig.8C,D,I,J). Cells medial

and medial-ventral to the placode incorporated into the supraesophageal mass (cerebral ganglia), buccal mass and buccal ganglia (Fig.8E,K). Cells ventrolateral to the placode incorporated into the subesophageal mass (pedal ganglia) (Fig.8F,L). Figure 12 shows the placode-stage lineages mapped onto three-dimensional rendering of neuroganglia in a hatching stage embryo generated through MicroCT scanning (Kerbl, 2013).

### **Development of Embryonic Transcriptomic Resources for *D. pealeii***

Although Next Generation sequencing has advanced non-model systems, large-scale genomic infrastructure and in-depth transcriptomic databases in the Lophotrochozoa, remain lacking. With this in mind, and our goal of identifying genes and regulatory networks that facilitate eye development in *Doryteuthis pealeii*, it was necessary to establish a transcriptomic database for embryogenesis and eye morphogenesis. We could then evaluate candidate eye development genes en masse and correlate temporal expression to focus our expression and functional analysis. To achieve this, a pooled embryonic transcriptome of twelve stages of

development (Stages 16-27) was sequenced, assembled *de novo* and annotated. In addition, RNA-seq data from dissected placode tissue and eye and optic lobe tissues were generated from five developmental stages (19, 21, 23, 25, 27). Each developmental stage was sequenced in biological triplicate (see Materials and Methods for details).

The eye is unusual because it contains cells with conserved functions, such as opsin-expressing photoreceptor cells, in the context of a complex and independently evolved organ. As a result, we expected to identify both conserved molecular markers as well as genes previously unassociated with photoreceptive organs. We were able to assess the presence of candidate eye genes as a first step to determine homoplasy or conserved functionality in cell and tissue identity networks. Moreover, the time-course RNA-seq data provided a quantitative assessment of gene expression over time.

During analysis, we generated a heatmap of transcription factors with dynamic expression (Fig.9). Looking closely at two representative clusters, genes involved in eye development in other systems are well represented. For example, Lim factors, Pou family members and *BarH* are known to be essential

in many neurodevelopmental contexts and are important in vertebrate and *Drosophila* eye development (Hobert, 2000; Rosenfeld, 1991; Reig, 2007). Pou expression has also been shown in late stage development of the eye in the squid *Idiosepius notoides* (Wollesen, 2014). *Cut* is necessary for cone cell differentiation and lens formation in *Drosophila*, and Neural retina-specific leucine zipper protein functions during vertebrate retinal cell differentiation (Mears, 2001; Nepveu, 2001). Interestingly, the transcription factor *Ovo*, enriched early in our dataset, functions during eye regeneration in planaria (Lapan, 2012). Importantly, the expression of these genes does not differentiate between conserved and convergent functions within eye development and despite the occurrence of many transcription factors necessary for eye development in other systems, we also identified a number that are as yet unexplored in the visual system (i.e. Abdominal-B/Post2, Knot, Hhex, Hepatic leukemia factor). These genes may have evolved a novel function in cephalopods, or we may be witnessing a cryptic function previously unidentified in other systems.

## Expression of Genes Involved in Vertebrate and *Drosophila* Eye Development

This developmentally focused transcriptome provides broad coverage of candidate transcription factors, transcriptional cascades and signaling pathways known to be involved in *Drosophila* and vertebrate eye development. As discussed above, the Pax6 transcriptional cascade (RDN) and Notch signaling pathway both play critical roles during eye formation in other taxa, and these genes displayed interesting changes in expression over time (Fig.10). *Pax6*, *Six* genes, *Prospero* and *Eyes Absent* all were more highly represented at early stages in our dataset. Notch pathway member expression was also interesting. *Notch* was expressed throughout eye development and was enriched at later stages. One Delta family member and all Hes family members, except for Isogroup00902, mirrored *Notch* expression.

We were interested in these candidate eye genes and how Notch might be functioning during neurogenesis. To begin to address this, we cloned *Pax6*, *Six3*, *Six2*, *Pax2*, *Eyes Absent*, *Notch*, *Hes* (Isogroup00502) and *Prospero*. Sequence alignment and maximum likelihood phylogenetic analyses confirmed



orthology (Fig.S3). *In situ* hybridizations identified spatial patterns of expression (Fig.11,S2) which were then correlated with the Stage 18 fate map, enabling us to predict the terminal fates of cells expressing specific genes (Fig.11,12).

At Stage 18, *Notch*, *Hes*, *Prospero* and *Eyes Absent* were each expressed in cells of the placode, which give rise to the retina. *Notch* expression was detected asymmetrically on the ventral side of the placode and also in the surrounding extra-ocular tissue. *Hes* expression was variable; at Stage 18, *Hes* was detected in only a portion of the placode, while at Stage 19, *Hes* was expressed throughout the entire placode (Fig.11). *Hes* expression in the retina continued through Stage 27 (Fig. S2F,11,13). *Prospero* was expressed in a punctate pattern at the ventral edge of the placode. *Eyes Absent* was expressed throughout the placode, but asymmetrically, with more signal detected on the ventral edge. *Eyes Absent* was also detected in tissue surrounding the placode. *Pax6*, *Pax2* and *Six3* are all expressed in the lip cells surrounding the placode. These cells give rise to the lens and iris. *Pax6* expression was detected broadly, dorsal and lateral to the placode, in the

region of cells contributing to the optic lobe. *Six3* was expressed only medial to the placode, in the region contributing to the cerebral ganglia. *Pax2* was expressed in cells of the lip as well as in distinct stripes dorsal to the placode, in the optic lobe progenitor region. *Pax2* was also prominently expressed in the developing arms. Finally, *Six2* was expressed in the tissue just ventral and lateral to the placode. Interestingly, while Pax and Six genes were expressed in the retina at later stages of development (Fig.S2A,B,D,E), expression was not detected in the placode at Stage 18. However, we cannot rule out that they are expressed below the threshold for detection. Figure 12 summarizes placode stage gene expression patterns associated with cell fates in the hatching stage embryo.

## **Loss of Notch Signaling Leads to Retina Disorganization and Premature Cell Cycle Exit**

Our lineage tracing data confirmed that placode tissue incorporated into the retina, and gene expression studies indicated that Notch pathway members were expressed in placode cells. Thus, we were interested in whether

Notch signaling functioned during retina formation in squid, and more specifically, whether the Notch pathway regulates progenitor maintenance as it does in vertebrates and *Drosophila*. *In vivo* transfection methods or genome editing techniques have not been developed in any cephalopod species making targeted loss of function studies difficult. To circumvent this, we treated embryos with the well-characterized Notch inhibitor DAPT to determine how Notch signaling impacts retina formation (Geling, 2002). Embryos were treated for 24 hours and allowed to recover until vehicle controls reached Stage 27. To assess the efficacy of DAPT, *in situ* hybridization for *Hes* was performed, a useful readout of active Notch signaling. Control embryos maintained robust *Hes* expression, while treated embryos lacked *Hes* expression completely, confirming an effective knockdown of Notch pathway activity by DAPT (Fig.13A).

DAPT-treated embryos were microphthalmic and lacked retina pigmentation. In sectioned samples, the retina was completely disorganized: the basal membrane was absent, morphologically distinct photoreceptor cells were not detectable and there was no defined photoreceptor layer (Fig.13B).

Lentigenic cells and lens formation appeared normal, suggesting that the effects of blocking Notch pathway activity are specific to the retina. Three hours after DAPT treatment, apoptotic cell numbers did not differ from wild type indicating that apoptosis is not an immediate response to DAPT treatment (Fig.S4). Apoptotic cells were observed in the retina after an extended recovery period, however, a result similar to the loss of Notch signaling in the vertebrate retina (Tomita, 1996).

These data suggest that Notch signaling is required for photoreceptor cell differentiation in the squid retina. To further test this hypothesis we performed an *in situ* hybridization for the photoreceptor cell marker, *rhodopsin*. In control embryos, *rhodopsin* is robustly expressed in the retina. However, in DAPT treated animals, *rhodopsin* expression is lost (Fig.13C). Retinal cells in DAPT-treated embryos could either remain in a progenitor-like, undifferentiated state or they could prematurely exit the cell cycle and differentiate into a cell type other than a rhodopsin expressing photoreceptor. To distinguish between these possibilities, we performed BrdU incorporation assays. While control embryos incorporated BrdU normally, DAPT-treated

embryos contained no BrdU<sup>+</sup> retinal cells (Fig.13D). These data support the model that Notch activity is required to maintain neural progenitors. To determine if the prematurely differentiating retinal cells retained a neural fate, we performed *in situ* hybridization for the neural marker *Neural Filament 70* (*NF70*) (Szaro, 1991). Retinal cells in DAPT treated embryos were positive for *NF70* suggesting that, while not photoreceptors, they did differentiate into a neural cell type (Fig.13E).

## Discussion

### ***Doryteuthis pealeii* as a Model for the Evolution of the Visual System and Neural Complexity**

The last fifteen years have seen consistent growth in the molecular accessibility of lophotrochozoan systems (Henry, 2010; Gentile, 2011; Ferrier, 2012; Zantke, 2014; Simakov, 2013). Each of these systems has their strengths but the present models are relatively simple organisms. Cephalopods are a special group whose complex nervous system, unusual body plan and compelling behavior provide a unique opportunity to understand the evolution of complexity. Here, we establish a tractable system to study complex organ development and evolution. Our data generate an in-depth developmental resource to study a photoreceptive organ outside *Drosophila* and vertebrates and exciting opportunities now exist to probe the evolution of organogenesis and its genetic and cellular underpinnings.

## Redrawing the Cephalopod Neural Primordia Map

We generated the first detailed fate map in any cephalopod species, and this empowers the field to draw new conclusions from old data. By generating these data, not only have we confirmed that the retina in *D. pealeii* arises from the eye placode and that the lens, cornea and iris are derived from the placode lip, but by combining them with gene expression studies, we also identified candidate genes likely involved in mediating cell fate specification events in these tissues (Arnold, 1965; Marthy, 1973; Naef, 1928). Furthermore, we do not detect cells incorporating into the eye from any other region, indicating that all eye tissue is likely derived solely from the placode and placode lip.

Previous studies utilized histology to identify ganglionic anlagen in the developing cephalopod nervous system (Yamamoto, 2003). Our fate map confirms and expands the region of cells contributing to the cerebral ganglia, as well as the region of cells contributing to the pedal ganglia. This supports recent findings in octopus and *Sepia officinalis* that suggest a broader neurogenic field and the cordal hypothesis (Shigeno, 2015; Buresi, 2016).

Interestingly, our fate map identifies optic lobe progenitor cells in a drastically different location than formerly proposed (Naef,1928; Yamamoto, 2003). Our data demonstrate that optic lobe progenitors lie dorsal to the placode, while previously optic lobe primordia had been placed ventral to the placode. This displaces the previously identified palliovisceral primordia, suggesting the location of these progenitors is dorsal to the optic lobe progenitors. The redrawing of the neural primordial map enables the accurate interpretation of gene expression profiles from placode stage embryos onto later fates and dictate a reinterpretation of previous gene expression studies in other cephalopod species.

### **Correlating Gene Expression Studies with Cell Fates**

Capitalizing on the fate map, we superimpose gene expression patterns on this map and correlate gene products with late-stage ocular fates. *Pax6*, *Pax2*, and *Six3* are all co-expressed in the lip of the placode, and this region gives rise to the lens, cornea and iris (Fig.12). The lens, cornea and iris are lineage specific novelties in cephalopods, but interestingly, *Pax6* and *Six3* are



required for lens induction in vertebrates (Oingo, 2012; Cvekl, 2014). Currently, little is known about any lens specific function of *eyeless* and *twin of eyeless* (Pax6 orthologs) in *Drosophila* but imaginal disc cells expressing *eyeless* and *twin of eyeless* that give rise to the retina also generate the lens (Charlton-Perkins, 2011a). *dPax2* is required for lens development in *Drosophila* but Pax2 does not play a known role in vertebrate lens formation (Fu, 1997). Pax2/5/8 was not found expressed in or around the eye and optic lobe in *Idiosepius notoides* until late stages, but is correlated with sensory systems in molluscs (Wollesen, 2015). Pax6 is broadly expressed in neurogenic tissues in other cephalopods, primarily optic lobe and eye regions, but also in potentially pedal ganglionic regions (Buresi, 2016).

There are three interpretations of the shared deployment of Pax and Six genes during lens formation. The first is that the tissue that generates the lens and the developmental origin of this tissue in *Drosophila*, vertebrates and cephalopods is homologous. This possibility supposes that in the common ancestor this tissue expressed Pax and Six genes and elaborated into the lens. In cephalopods and in *Drosophila*, the lens is derived from the same cells as,

or adjacent cells to, the retina and therefore this tissue homology is plausible. However, in vertebrates, the lens placode is derived from the surface ectoderm and therefore is unlikely to be homologous. The second possibility is the concept of the cell as a unit of homology. This would suggest that a lens cell program existed in the common ancestor and this program included Pax and Six genes and was redeployed in the vertebrate surface ectoderm. This possibility is unlikely because crystallin proteins have evolved separately in each lineage, and there are many examples of photoreceptive organs found across the Bilateria lacking lenses (Jonasova, 2008; Oakley, 2015). Moreover, lens tissue drastically differs across taxa, varying from cellular to acellular (Jonasova, 2008). These three lines of evidence suggest that no such lens cell existed in the common ancestor. Finally, the most plausible possibility is that Pax and Six gene involvement is homoplastic and independently evolved in lens formation. Pax transcription factor binding sites have been found upstream of Crystallin genes not only in Vertebrates and *Drosophila* but also in Scallops and Cnidarians (Piatigorsky, 2007). Pax involvement in lens formation in the cephalopod is one of many examples of this convergence.

Currently, not enough is understood about the evolution of regulatory pathways to explain convergent gene regulation in independently evolved tissues. Ultimately, the results of this study highlight the need for better characterization of gene regulatory networks across the Bilateria to address questions regarding how networks elaborate and result in morphological complexity and diversity.

Beyond the placode lip, *Pax6* and *Pax2* are expressed in regions contributing to the squid optic lobe. *Pax6* also extends into the region contributing to the pedal ganglia. *Six3* is specifically expressed in the region contributing to the cerebral ganglia and *Six2* may play a role in pedal ganglia development. Interestingly, *Eya* has broad expression surrounding the retina, traversing all regions around the placode as well as the placode proper. It is possible that *Eya* is also contributing to lens and iris development. This is suggested by *Eya* expression in the cells surrounding the site of vesicle fusion and lens formation at Stage 21 (Fig.S2G).

In squid, *Prospero* is expressed in a subset of cells on the ventral side of the retina placode. In *Drosophila*, *pros* specifies cone cells that generate the

lens (Charleton-Perkins, 2011b). Prox1, the vertebrate homolog of *pros*, is involved specification and differentiation of neurons within the retina as well as lens development (Wigle, 1999). In squid, *Prospero* does not appear to be expressed in the early lens generating cells, but rather in the retina proper. This expression expands from a few cells to the entire retina later in development (Fig.S2C). This specific punctate expression at Stage 18 suggests cell heterogeneity in the early retina primordia.

## **Notch Signaling is a Common Mechanism Regulating Neuroepithelial Differentiation Across the Bilateria**

It has been shown that Notch regulates differentiation in multiple Bilaterian species and that non-canonical Notch regulates neural differentiation in Cnidarians and may be ancestral to neural cell differentiation in the Bilateria (Louvi, 2006; Layden, 2014). The regulation of photoreceptor cell differentiation in the *Drosophila* eye was one of the first examples of Notch signaling functioning through lateral inhibition and this was subsequently demonstrated in the vertebrate retina, where Notch signaling is

essential for vertebrate neurogenesis (Cagan, 1989; Austin, 1995; Pan, 1997; Henrique, 1997; Reviewed in Kumar, 2001; Louvi, 2006). Work in zebrafish demonstrated that the Notch pathway influences neuronal differentiation in neuroepithelial cells undergoing interkinetic nuclear migration (IKNM). In the retina, a Notch gradient exposes the migrating progenitor cell nucleus to differing amounts of intra-cellular Notch depending on the phase of the cell cycle (Del Bene, 2008). In both the *Drosophila* eye disc as well as in an elongated pseudostratified epithelium, loss of Notch signaling results in the premature differentiation of neural cell types and the loss of progenitor populations (Del Bene, 2008; Cagan, 1989).

Notch and Notch pathway members have been shown to function in annelid segmentation and to be expressed in the developing nervous system in *Capitella*. Our work is the first evaluation of Notch signaling in the lophotrochozoan photoreceptive organ and specifically addressing neurodifferentiation (Thamm, 2008; Rivera, 2009). Our description of eye morphogenesis shows that the cephalopod retina is composed of a pseudostratified epithelial tissue, like the vertebrate retina, and that loss of

Notch activity results in cell cycle exit and premature differentiation. IKNM has been identified as a shared aspect of pseudostratified epithelia and has been observed in multiple tissues in vertebrates, in the *Drosophila* wing disc, and in *Nematostella*, however this is the first description of IKNM in any lophotrochozoan (Gibson, 2011). Nuclear migration has been described in the *Drosophila* eye disc but not directly related to the process occurring in vertebrate neuroepithelial tissue, and it is not linked to the cell cycle (Tomlinson, 1986). Neurogenesis described in the lophotrochozoan *Capitella* sp. 1 shows the formation of a stratified epithelium through ingression of single epithelial cells from the anterior ectoderm (Meyer, 2009). A similar mechanism has been predicted during neurogenesis of other brain regions in the cephalopod (Marthy; 1987). Our results in the retina support a mechanism governing differentiation and progenitor cell maintenance of photoreceptive neuroepithelial tissue regulated by Notch that may be shared by vertebrates and cephalopods. An in depth understanding of IKNM and neuroepithelial formation more broadly in the Lophotrochozoa is necessary to better

understand the cellular toolkit shared by the Bilateria to generate neural complexity.

## **Conclusions**

Our goal is to establish the cephalopod eye as an accessible system to address questions regarding the evolution of nervous system complexity and gain insight into the nature of photoreception in the Urbilateria ancestor. We have shown the potential of this system by identifying a case of convergence in the genetic network underlying formation of the cephalopod lens. These findings suggest a greater prevalence of homoplasy in the shared genetic networks underlying complex organs and highlight the significant amount of work that remains to better understand the nature of gene regulatory evolution.

Finally, this study also highlights cellular behaviors and characteristics that are likely to be fundamental to the development of nervous systems across the Bilateria. Building our understanding of the character of tissues and cells that are shared across species gives us greater insight into how

complexity is built. Notch signaling enables the generation of multiple neural cell types. The organization of neuroepithelia and the process of IKNM may be the mechanism to achieve this complexity. It will be necessary to explore gene and protein expression of the Notch pathway in greater detail in the cephalopod as well as other taxa to understand how these mechanisms contribute to this process in the Urbilaterian ancestor. In all, this work opens a new avenue of investigation regarding the evolution of complexity and the emergence of novelty.



## **Materials and Methods**

### **Animal Husbandry**

Squid were acquired at the Marine Biological Laboratory, Woods Hole, MA.

Embryos were cultured at 20°C.

### **Whole Embryo Transcriptome and RNA-seq Library Library Prep**

Two embryos from the same egg sack of each stage, from 16-27, were prepared in TRIzol, phase separated and transferred to a QIAGEN RNeasy column. Libraries were prepared after (Meyer, 2012). Libraries were combined at equal volume and sequenced using 454 technology at UT Austin. Eye and optic lobes tissues were dissected and prepared in TRIzol for RNA-Seq. Libraries were prepared at the Vanderbilt VANGTAGE laboratory using poly(A) selection and TruSeq library production, and sequenced on an Illumina platform.

## **Assembly, Annotation, Mapping, and Statistical Analysis**

454 raw reads were processed using custom Perl scripts (Meyer, 2009). Trimmed reads were assembled using Newbler v2.6. Annotation was performed using BLASTX and custom Perl scripts mapped against the Uniprot database (release 2014\_09). Illumina data were processed for quality using custom Perl scripts ([https://github.com/Eli-Meyer/sequence\\_processing](https://github.com/Eli-Meyer/sequence_processing)). Reads were mapped to the reference transcriptome (Meyer, 2012). Raw read and assembly statistics are presented in Fig.S5. All raw reads and annotated data have been deposited at the NCBI (SRA Accession SRP065414 and SRP066528).

## **Time Course Clustering and Differential Gene Expression Analysis**

Differential gene expression analysis and clustering was performed using the DESeq2 Bioconductor package version 1.10.1 run in R for Mac release 3.2.0 (Love, 2014). Data were exposed to log transformation and variance stabilizing transformation, analyzed for principal component analysis, variance and differential gene expression across stages. Analyses were performed on the

whole data set and subsets of the data, focusing on transcription factors (GO:0006355 and GO:0003700). The likelihood ratio test was performed comparing Stage 19 to Stage 27. A false discovery rate of 0.1 was used to assess differential gene expression and the hierarchical clustered heatmaps were generated based on Pearson correlation using heatmap.2 in the gplots package for R.

## Alignment and Trees

Sequence analysis was performed using Geneious (Kearse, 2012). Candidate sequences were identified through reciprocal Blast using *Drosophila* orthologs as bait. Isotig sequences were translated and trimmed for the ORF. Shared protein domains were identified using the PFAM database, identifying hidden Markov models (HMM) to search the rp-15 proteome database through the HMMER server (Bateman, 2004; Finn, 2011). A representative taxonomic subset of sequences and lophotrochozoan sequences were included in the final analysis. For Eya, no PFAM HMM is available. A sampling of the related proteins was generated with Blast using *Drosophila* Eya as bait. Multiple

sequence alignment on the amino acid sequences were performed using the E-INS-I strategy in MAFFT (Kato, 2013). We estimated support for a consensus tree from 1000 bootstrapped maximum likelihood trees for each phylogeny using PHYML (Guindon, 2010). Trees are shown unrooted (Fig. S3). Sequences available in Supplemental Table 2.

### **Cloning and *In Situ* Probe Synthesis**

RNA from a range of embryonic stages was reverse transcribed to create a cDNA library. Cloning primers are available in Supplemental Table 1. cDNA sequences were verified by Sanger sequencing. Sense and anti-sense riboprobes were synthesized with digoxigenin labeled rNTPs (Roche).

### ***In Situ* Hybridization**

Embryos were fixed overnight in 4% paraformaldehyde and filtered seawater (FS). Embryos were transitioned into Hybridization buffer (Hyb) (50% Formamide, 5x SSC, 40ul Heparin, 0.25% Tween-20, 1% SDS, 200 mg yeast t-RNA). Embryos incubated in Hyb at 65°C overnight. Probe was heated to 85°C

in Hyb and applied to embryos overnight. Embryos were washed 3x in Hyb for 10min and 2x for 60min. Embryos were transitioned into 50% washes of 2x SSC for 20min and 2x washes of 3x SSC for 20min. Embryos were washed 2x in 0.2x SSC at room temperature for 5min and 3x in PBS and 0.1% Triton-X (PT) for 5min. Embryos were incubated in 5% Normal Goat Serum and PBS and Triton for 30min and then incubated in alkaline-phosphatase-labeled anti-Digoxigenin fab fragments (Roche) at 1:2000 in PT-NGS overnight at 4°C. Embryos were washed with PBS and Triton-X and developed.

### **Staging Series**

Embryos were fixed in 4% paraformaldehyde in FS overnight. Embryos were washed in PT and incubated in 25% sucrose for 60min and 35% sucrose overnight. Embryos were embedded in Tissue Freezing Medium and 12um sections were cut. Three individuals were documented at each stage. Sections were stained with Sytox-Green (5uM) and Phalloidin (2.2uM). Sections were mounted in Vectashield (Vector Labs) and visualized using confocal microscopy. Images are single z-planes.

## **BrdU Incorporation Assays**

Embryos were exposed to 10mM BrdU in Pen-Step seawater (100 units/ml and 100 ug/ml respectively) for 3hrs and fixed immediately after exposure.

Embryos were prepared and sectioned as above. Once sectioned, slides were rehydrated in PBS and incubated in 4N HCl for 10min at 37°C. Sections were washed in PBS and blocked with 5% NGS. Sections were incubated in Rat anti-BrdU (Abcam, ab6326) overnight at 4°C. Sections were washed in PBS and incubated in secondary antibody (Jackson ImmunoResearch: catalog number 112-175-143) for 2hrs at room temperature. Embryos were washed in PBS for 2hrs and exposed to Sytox-Green as described above. Specimens were mounted in Vectashield (Vector Labs) and imaged using confocal microscopy.

## **TUNEL Assays**

TUNEL was performed according to manufacturers instructions (*In Situ* Cell Death Detection Kit; ROCHE: 12156792910). At least three individuals were examined for each stage.

## Histology Series

Embryos were fixed in 4% glutaraldehyde and 2% formaldehyde in seawater then incubated in a solution of 4% glutaraldehyde, 2% paraformaldehyde, 0.1M cacodylate, 2mM Ca, 4 mM Mg overnight and washed with 0.1M cacodylate buffer. Embryos were incubated in 2% osmium tetroxide/4% potassium ferrocyanide/0.2M cacodylate buffer mix, and microwaved under vacuum. The microwave was set to 100W. Embryos were washed with deionized water, dehydrated with ethanol, transferred to an acetone solution, infiltrated with epoxy resin and baked for two days at 37°C. Embryos were sectioned at 0.7um, stained with toluidine blue and imaged. At least 3 individuals were examined for each stage.

## MicroCT

Hatchlings were fixed in 4% glutaraldehyde and 2% paraformaldehyde in seawater. Hatchlings were washed in PBS and stained with 0.1% iodine/0.2% potassium iodide in water. Specimens were dehydrated overnight into ethanol

and scanned using the Xradia micro CT Scanner at the University of Texas High-Resolution CT Facility.

### **Lineage Tracing**

A stock solution of 5ug/ul of CellTracker CM-DiI (Invitrogen) in ethanol was diluted into vegetable oil (0.5ug/ul). Embryos were reared in 12 well culture dishes on 1% agarose in Pen-Strep FS, fixed in 4% PFA. Specimens were documented wholemount and embedded, cryosectioned and imaged.

### **DAPT Treatments**

Embryos were dissected from chorions and incubated in 20uM or 40uM DAPT dissolved in 1% DMSO and Pen-Strep FS. Embryos were cultured in groups of seven or less. Experiments included over 20 embryos per exposure. Control embryos were incubated in 1% DMSO in Pen-Strep FS. Embryos were exposed for 24hrs and either fixed immediately, exposed to BrdU for 3hrs and fixed, or allowed to recover and grow to Stage 27 and fixed. At least three individuals were examined for each experiment.



## **Acknowledgements**

The authors acknowledge the Texas Advanced Computing Center (TACC) at The University of Texas at Austin for providing {HPC, visualization, database, or grid} resources that have contributed to the research results reported within this paper. URL: <http://www.tacc.utexas.edu>. MicroCT data were obtained at the High-Resolution X-ray Computed Tomography Facility of the University of Texas at Austin. We are grateful to Joe Digiorgis, Josh Rosenthal, Andrew Gillis and members of the Gross lab for critical discussion and suggestions on this work, to Dwight Romanowicz for assistance with histology, to Jerry Dammers and Jennifer Moore for assistance with image processing, and to the staff of the Marine Resource Center at the Marine Biological Laboratory in Woods Hole for assistance with embryo collection.

## **Competing Interests**

No competing interests declared.

## **Author Contributions**

Conceived of project: KK, JG

Designed experiments: KK, JG

Executed experiments: KK, PS

Analyzed data: KK, JG, EM

Wrote manuscript: KK

Edited manuscript: KK, JG

## **Funding**

This work was funded by a fellowship from the Grass Foundation to KMK, by the Plum Foundation Research Award, the H. Keffer Hartline and Edward MacNichol, Jr. Fellowship Award and the Laura and Arthur Colwin Endowed Summer Research Fellowship Fund Award, and NSF CAREER Award IOS-0745782 to JMG.

## References

- Allen RD, Metuzals J, Tasaki I, Brady ST, and Gilbert SP (1982). Fast axonal transport in squid giant axon. *Science*, **218**(4577), 1127-1129.
- Albertin CB, Simakov O, Mitros T, Wang ZY, Pungor JR, Edsinger-Gonzales E, Brenner S, Ragsdale CW, and Rokhsar DS (2015). The octopus genome and the evolution of cephalopod neural and morphological novelties. *Nature*, **524**(7564), 220-224.
- Alon S, Garrett SC, Levanon EY, Olson S, Graveley BR, Rosenthal JJ, and Eisenberg E (2015). The majority of transcripts in the squid nervous system are extensively recoded by A-to-I RNA editing. *eLife*, **4**, e05198.
- Arendt D (2003) Evolution of eyes and photoreceptor cells *International Journal of Developmental Biology* **47** (563).
- Arnold JM (1965). Normal embryonic stages of the squid, *Loligo pealii* (Lesueur). *Biological Bulletin*, 24-32.
- Arnold JM (1966). On the occurrence of microtubules in the developing lens of the squid *Loligo pealii*. *Journal of ultrastructure research*, **14**(5), 534-539.
- Arnold JM (1967). Fine structure of the development of the cephalopod lens. *Journal of ultrastructure research*, **17**(5), 527-543.
- Arnold JM and Williams-Arnold LD (1976). The egg cortex problem as seen through the squid eye. *American Zoologist*, **16**(3), 421-446.
- Austin CP, Feldman DE, Ida JA, and Cepko CL (1995). Vertebrate retinal ganglion cells are selected from competent progenitors by the action of Notch. *Development*, **121**(11), 3637-3650.
- Baker NE (2001). Cell proliferation, survival, and death in the *Drosophila* eye. In *Seminars in cell & developmental biology* (Vol. 12, No. 6, pp. 499-507). Academic Press.
- Baratte S, Andouche A, and Bonnaud L (2007). Engrailed in cephalopods: a key gene related to the emergence of morphological novelties. *Development genes and evolution*, **217**(5), 353-362.
- Bassaglia Y, Bekel T, Da Silva C, Poulain J, Andouche A, Navet S, and Bonnaud L (2012). ESTs library from embryonic stages reveals tubulin and reflectin diversity in *Sepia officinalis* (Mollusca—Cephalopoda). *Gene*, **498**(2), 203-211.
- Bateman A, Coin L, Durbin R, et al. (2004). The Pfam protein families database. *Nucleic acids research*, **32**(suppl 1), D138-D141.
- Baye LM and Link BA (2008). Nuclear migration during retinal development. *Brain research*, **1192**, 29-36.

Blair SS (1999) Eye development: Notch lends a handedness *Current Biology*, **9**: R356-R360

Brady ST, Lasek RJ, and Allen RD (1982) Fast axonal transport in extruded axoplasm from squid giant axon. *Science* **218**(4577) 1129-1131.

Buresi A, Baratte S, Da Silva C, and Bonnaud L (2012). orthodenticle/otx ortholog expression in the anterior brain and eyes of *Sepia officinalis* (Mollusca, Cephalopoda). *Gene Expression Patterns*, **12**(3), 109-116.

Buresi A, Canali E, Bonnaud L, and Baratte S (2013). Delayed and asynchronous ganglionic maturation during cephalopod neurogenesis as evidenced by *Sof-elav1* expression in embryos of *Sepia officinalis* (Mollusca, Cephalopoda). *Journal of Comparative Neurology*, **521**(7), 1482-1496.

Cagan RL, and Ready DF (1989). Notch is required for successive cell decisions in the developing *Drosophila* retina. *Genes & development*, **3**(8), 1099-1112.

Charlton-Perkins M, Brown NL, Cook TA (2011a) The lens in focus: a comparison of lens development in *Drosophila* and vertebrates. *Molecular Genetics and Genomics* **286** (3-4) 189-213.

Charlton-Perkins, M., Whitaker, S. L., Fei, Y., Xie, B., Li-Kroeger, D., Gebelein, B., & Cook, T. (2011b). Prospero and Pax2 combinatorially control neural cell fate decisions by modulating Ras-and Notch-dependent signaling. *Neural development*, **6**(1), 1-17.

Cook T, Pichaud F, Sonnevile R, Papatsendko D, Desplan C (2003) Distinction between color photoreceptor cell fate is controlled by Prospero in *Drosophila* **4**:853-864

Cvekl A, Ashery-Padan R (2014) The cellular and molecular mechanisms of vertebrate lens development. *Development* **141**: 4432-4447.

Darwin, C. (1859). On the origin of species. *Murray, London*, 360.

Dyer MA, Livesey FJ, Cepko CL, Oliver G (2003) Prox1 function controls progenitor cell proliferation and horizontal cell genesis in the mammalian retina *Nature Genetics* **34**:53-58.

Farfán C, Shigeno S, Nödl MT, Couet D, and Gert H (2009). Developmental expression of *apterous/Lhx2/9* in the sepiolid squid *Euprymna scolopes* supports an ancestral role in neural development. *Evolution & development*, **11**(4), 354-362.

Fernald RD (2004) Eyes: Variety, Development and Evolution. *Brain Behav Evol*; **64**:141-147

Fernald RD (2006). Casting a genetic light on the evolution of eyes. *Science*, **313**(5795), 1914-1918.

Ferrier DE (2012). Evolutionary crossroads in developmental biology: annelids. *Development*, 139(15), 2643-2653.

Finn RD, Clements J, & Eddy SR (2011). HMMER web server: interactive sequence similarity searching. *Nucleic acids research*, gkr367.

Focareta L, Sesso S, and Cole AG (2014). Characterization of homeobox genes reveals sophisticated regionalization of the central nervous system in the European cuttlefish *Sepia officinalis*. *PloS one*, 9(10), e109627.

Fu W, and Noll M (1997). The Pax2 homolog sparkling is required for development of cone and pigment cells in the *Drosophila* eye. *Genes & development*, 11(16), 2066-2078.

Gehring WJ, Ikeo K (1999) Pax 6: mastering eye morphogenesis and eye evolution, *Trends in Genetics*, 15 (9) 371-377.

Gehring WJ (1996) The master control gene for morphogenesis and evolution of the eye. *Genes to Cells* 1 1265-2443.

Gehring WJ (2005) THE WILHEMINE E. KEY 2004 INVITATIONAL LECTURE: New Perspectives on Eye Development and the Evolution of Eyes and Photoreceptors *J Hered* 96 (3): 171-184.

Geling A, Steiner H, Willem M, Bally- Cuif L, and Haass C (2002). A  $\gamma$ - secretase inhibitor blocks Notch signaling in vivo and causes a severe neurogenic phenotype in zebrafish. *EMBO reports*, 3(7), 688-694.

Gentile L, Cebrià F, and Bartscherer K (2011). The planarian flatworm: an in vivo model for stem cell biology and nervous system regeneration. *Disease models & mechanisms*, 4(1), 12-19.

Gilbert D L, Adelman W J, and Arnold JM (1990). *Squid as experimental animals*. Springer Science & Business Media.

Go MJ, Eastman DS, and Artavanis-Tsakonas S (1998). Cell proliferation control by Notch signaling in *Drosophila* development. *Development*, 125(11), 2031-2040.

Guindon S, Dufayard JF, Lefort V, Anisimova M, Hordijk W, and Gascuel O. (2010). New algorithms and methods to estimate maximum-likelihood phylogenies: assessing the performance of PhyML 3.0. *Systematic biology*, 59(3), 307-321.

Halder G, Callaerts P, Gehring WJ (1995) New perspectives on eye evolution *Current Opinion in Genetics & Development*, 5 (5), 602-609.

Hartmann B, Lee PN, Kang YY, Tomarev S, De Couet HG, and Callaerts P (2003). Pax6 in the sepiolid squid *Euprymna scolopes*: evidence for a role in eye, sensory organ and brain development. *Mechanisms of development*, 120(2), 177-183.

Henrique D, Hirsinger E, Adam J, Le Roux I, Pourquié O, Ish-Horowicz D, and Lewis J (1997). Maintenance of neuroepithelial progenitor cells by Delta–Notch signalling in the embryonic chick retina. *Current biology*, 7(9), 661-670.

Henry JJ, Collin R, and Perry KJ (2010). The slipper snail, *Crepidula*: an emerging lophotrochozoan model system. *The Biological Bulletin*, 218(3), 211-229.

Hobert O, & Westphal, H. (2000). Functions of LIM-homeobox genes. *Trends in genetics*, 16(2), 75-83.

Hodgkin AL, Katz B (1949) The effect of sodium ions on the electrical activity of the giant axon of the squid. *The Journal of Physiology*. **108**(1), 37-77

Hodgkin AL, Huxley AF (1952a) Currents carried by sodium and potassium ions through the membrane of the giant axon of *Loligo*. *The Journal of Physiology*. **116**(4), 449-472

Hodgkin AL, and Huxley AF (1952b). The dual effect of membrane potential on sodium conductance in the giant axon of *Loligo*. *The Journal of physiology*, **116**(4), 497-506.

Hodgkin AL, Huxley AF & Katz B (1952c). Measurement of current-voltage relations in the membrane of the giant axon of *Loligo*. *The Journal of physiology*, **116**(4), 424.

Jonasova K, and Kozmik Z (2008, April). Eye evolution: lens and cornea as an upgrade of animal visual system. In *Seminars in cell & developmental biology* (Vol. 19, No. 2, pp. 71-81). Academic Press.

Katoh K and Standley DM (2013). MAFFT multiple sequence alignment software version 7: improvements in performance and usability. *Molecular Biology and Evolution*, **30**(4), 772-780.

Kerbl A, Handschuh S, Nödl MT, Metscher B, Walzl M, and Wanninger A (2013). Micro-CT in cephalopod research: investigating the internal anatomy of a sepiolid squid using a non-destructive technique with special focus on the ganglionic system. *Journal of Experimental Marine Biology and Ecology*, **447**, 140-148.

Kearse M, Moir R, Wilson A, et al. (2012). Geneious Basic: an integrated and extendable desktop software platform for the organization and analysis of sequence data. *Bioinformatics*, 28(12), 1647-1649.

Kumar JP (2001). Signalling pathways in *Drosophila* and vertebrate retinal development. *Nature Reviews Genetics*, 2(11), 846-857.

Kumar JP (2010). 1 Retinal Determination: The Beginning of Eye Development. *Current topics in developmental biology*, 93, 1.

Kumar JP (2010) Chapter one - Retinal Determination: The Beginning of Eye Development, In: Ross L. Cagan and Thomas A. Reh, Editor(s), *Current Topics in Developmental Biology*, Academic Press (93) 1-28

Land MF, and Fernald RD (1992) The Evolution of Eyes. *Annual Review of Neuroscience*, 15: 1 -29. 1992.

Layden MJ and Martindale MQ (2014). Non-canonical Notch signaling represents an ancestral mechanism to regulate neural differentiation. *Evodevo*, 5(1), 30.

Lee PN, Callaerts P, de Couet HG, & Martindale MQ (2003). Cephalopod Hox genes and the origin of morphological novelties. *Nature*, 424(6952), 1061-1065.

Livesey FJ, and Cepko CL (2001). Vertebrate neural cell-fate determination: lessons from the retina. *Nature Reviews Neuroscience*, 2(2), 109-118.

Louvi A, and Artavanis-Tsakonas S (2006). Notch signalling in vertebrate neural development. *Nature Reviews Neuroscience*, 7(2), 93-102.

Love MI, Huber W, and Anders S (2014). Moderated estimation of fold change and dispersion for RNA-seq data with DESeq2. *Genome Biol*, 15(12), 550.

Marthy HJ (1973). An experimental study of eye development in the cephalopod *Loligo vulgaris*: determination and regulation during formation of the primary optic vesicle. *Journal of embryology and experimental morphology*, 29(2), 347-361.

Marthy, H. J. (1987). Ontogenesis of the nervous system in cephalopods. In *Nervous Systems in Invertebrates* (pp. 443-459). Springer US.

Mears AJ, Kondo M, Swain PK, Takada Y, Bush RA, Saunders TL, Sieving PA, and Swaroop A (2001). Nrl is required for rod photoreceptor development. *Nature genetics*, 29(4), 447-452.

Meyer E, Aglyamova GV, Wang S, et al. (2009). Sequencing and de novo analysis of a coral larval transcriptome using 454 GSFlx. *BMC genomics*, 10(1), 219.

Meyer E, Logan TL, and Juenger TE (2012). Transcriptome analysis and gene expression atlas for *Panicum hallii* var. *filipes*, a diploid model for biofuel research. *The Plant Journal*, 70(5), 879-890.

Meyer NP, and Seaver EC (2009). Neurogenesis in an annelid: characterization of brain neural precursors in the polychaete *Capitella* sp. I. *Developmental biology*, 335(1), 237-252.



Naef, A. (1928). Die Cephalopoden (Embryologie). *Fauna Flora Golf Neapel*, 35(2), 1-357.

Navet S, Andouche A, Baratte S, and Bonnaud L (2009). Shh and Pax6 have unconventional expression patterns in embryonic morphogenesis in *Sepia officinalis* (Cephalopoda). *Gene Expression Patterns*, 9(7), 461-467.

Nepveu, A. (2001). Role of the multifunctional CDP/Cut/Cux homeodomain transcription factor in regulating differentiation, cell growth and development. *Gene*, 270(1), 1-15.

Nilsson DE (2004). Eye evolution: a question of genetic promiscuity. *Current opinion in neurobiology*, 14(4), 407-414.

Nilsson DE (2013). Eye evolution and its functional basis. *Visual Neuroscience*. 30 (1-2):5-20.

Oakley TH, Speiser DI (2015). How complexity originates: The evolution of animal eyes. *bioRxiv*, 017129.

Ogura A, Yoshida MA, Moritaki T, Okuda Y, Sese J, Shimizu KK, Sousounis K, and Tsonis PA (2013). Loss of the six3/6 controlling pathways might have resulted in pinhole-eye evolution in Nautilus. *Scientific Reports*, 3.

Oigo H, Ochi H, Reza HM, Yasuda K (2012) Transcription factors involved in lens development from the preplacodal ectoderm. *Developmental Biology* 363: 333-347

Pan D, and Rubin GM (1997). Kuzbanian controls proteolytic processing of Notch and mediates lateral inhibition during *Drosophila* and vertebrate neurogenesis. *Cell*, 90(2), 271-280.

Piatigorsky J (2007). *Gene sharing and evolution: The diversity of protein functions* (p.1). Cambridge MA: Harvard University Press.

Peyer SM, Pankey MS, Oakley TH, and McFall-Ngai MJ (2014). Eye-specification genes in the bacterial light organ of the bobtail squid *Euprymna scolopes*, and their expression in response to symbiont cues. *Mechanisms of development*, 131, 111-126.

Quiring R, Walldorf U, Kloter U, and Gehring WJ. (1994) Homology of the eyeless gene of *Drosophila* to the Small eye gene in mice and Aniridia in humans. *Science* 265 (5173), 785-789.

Reig, G., Cabrejos, M. E., & Concha, M. L. (2007). Functions of BarH transcription factors during embryonic development. *Developmental biology*, 302(2), 367-375.

Rosenfeld, M. G., Wu, W., & Ryan, A. K. (1991). POU Domain Transcription Factors. *Encyclopedia Of Molecular Medicine*.

Thamm K, and Seaver EC (2008). Notch signaling during larval and juvenile development in the polychaete annelid *Capitella* sp. I. *Developmental biology*, 320(1), 304-318.

von Salvini-Plawen L, Mayr E (1977) On the evolution of photoreceptors and eyes. *Evol. Biol.* 10, 207–263

Schnitzler CE, Pang K, Powers ML, et al. Genomic organization, evolution, and expression of photoprotein and opsin genes in *Mnemiopsis leidyi*: a new view of ctenophore photocytes. *BMC Biology*. 2012.

Schwarz, F Cercconi G, Bernier N, et al. (2000) Spatial specification of mammalian eye territories by reciprocal transcriptional repression of Pax2 and Pax6 *Development* **127**: 4325-4334.

Shigeno S, Parnaik R, Albertin CB, and Ragsdale CW (2015). Evidence for a cordal, not ganglionic, pattern of cephalopod brain neurogenesis. *Zoological Letters*, 1(1), 1-13.

Simakov O, Marletaz F, Cho SJ, Edsinger-Gonzales E, Havlak P, Hellsten U et al. Rokhsar, D. S. (2013). Insights into bilaterian evolution from three spiralian genomes. *Nature*, 493(7433), 526-531.

Szaro BG, Pan HC, Wa J, and Battey J (1991). Squid low molecular weight neurofilament proteins are a novel class of neurofilament protein. A nuclear lamin-like core and multiple distinct proteins formed by alternative RNA processing. *Journal of Biological Chemistry*, 266(23), 15035-15041.

Tomarev SI, Callaerts P, Kos L et al. (1997A) Squid Pax-6 and eye development. *Proceedings of the National Academy of Sciences* **94** (6) 2421-2426.

Tomarev SI (1997B). Pax-6, Eyes absent, and Prox 1 in eye development. *Int. J. Dev. Biol.* 41, 835-842.

Tomita, K, Ishibashi M, Nakahara K, Ang SL, Nakanishi S, Guillemot F, and Kageyama R (1996). Mammalian hairy and Enhancer of split homolog 1 regulates differentiation of retinal neurons and is essential for eye morphogenesis. *Neuron*, **16**(4), 723-734.

Tomlinson A, and Ready DF (1987). Neuronal differentiation in the *Drosophila* ommatidium. *Developmental biology*, 120(2), 366-376.

Treisman, J. E. (2013). Retinal differentiation in *Drosophila*. *Wiley Interdisciplinary Reviews: Developmental Biology*, 2(4), 545-557.

Vale RD, Schnapp BJ, Reese TS and Sheetz MP (1985a). Movement of organelles along filaments dissociated from the axoplasm of the squid giant axon. *Cell*, **40**(2), 449-454.



Vale RD, Schnapp BJ, Reese TS, and Sheetz MP (1985b). Organelle, bead, and microtubule translocations promoted by soluble factors from the squid giant axon. *Cell*, **40**(3), 559-569.

Vecino E, Hernández M, and García M (2004). Cell death in the developing vertebrate retina. *International Journal of Developmental Biology*, **48**(8-9), 965-974.

Wagner GP (2014) *Homology, Genes, and Evolutionary Innovation* (Princeton Univ Press, Princeton).

West JA, Sivak JG, Pasternak J, and Piatigorsky J (1994). Immunolocalization of S- crystallins in the developing squid (*Loligo opalescens*) lens. *Developmental dynamics*, **199**(2), 85-92.

West JA, Sivak JG, and Doughty MJ (1995). Microscopical evaluation of the crystalline lens of the squid (*Loligo opalescens*) during embryonic development. *Experimental eye research*, **60**(1), 19-35.

Wigle, J. T., Chowdhury, K., Gruss, P., & Oliver, G. (1999). Prox1 function is crucial for mouse lens-fibre elongation. *Nature genetics*, **21**(3), 318-322.

Wollesen T, McDougall C, Degnan BM, and Wanninger A (2014). POU genes are expressed during the formation of individual ganglia of the cephalopod central nervous system. *EvoDevo*, **5**(1), 41.

Wollesen, T., Monje, S. V. R., Todt, C., Degnan, B. M., & Wanninger, A. (2015). Ancestral role of Pax2/5/8 in molluscan brain and multimodal sensory system development. *BMC evolutionary biology*, **15**(1), 231.

Wild E, Wollesen T, Haszprunar G, and Heß M (2015). Comparative 3D microanatomy and histology of the eyes and central nervous systems in coleoid cephalopod hatchlings. *Organisms Diversity & Evolution*, **15**(1), 37-64.

Yamamoto, M. (1985a). Ontogeny of the visual system in the cuttlefish, *Sepiella japonica*. I. Morphological differentiation of the visual cell. *Journal of Comparative Neurology*, **232**(3), 347-361.

Yamamoto, M., Takasu, N., & Uragami, I. (1985b). Ontogeny of the visual system in the cuttlefish, *Sepiella japonica*. II. Intramembrane particles, histofluorescence, and electrical responses in the developing retina. *Journal of Comparative Neurology*, **232**(3), 362-371.

Yamamoto M, Shimazaki Y, and Shigeno S (2003). Atlas of the embryonic brain in the pygmy squid, *Idiosepius paradoxus*. *Zoological science*, **20**(2), 163-179.

Yoshida MA, Yura K, and Ogura A (2014). Cephalopod eye evolution was modulated by the acquisition of Pax-6 splicing variants. *Scientific reports*, **4**.

Young JZ (1962a). The retina of cephalopods and its degeneration after optic nerve section. *Philosophical Transactions of the Royal Society B: Biological Sciences*, 245(718), 1-18.

Young JZ (1962b). The optic lobes of *Octopus vulgaris*. *Philosophical Transactions of the Royal Society B: Biological Sciences*, 245(718), 19-58.

Young JZ (1971). Anatomy of the Nervous System of *Octopus vulgaris*.

Nixon, M., & Young, J. Z. (2003). *The brains and lives of cephalopods*. Oxford University Press.

Zantke, J., Bannister, S., Rajan, V. B. V., Raible, F., & Tessmar-Raible, K. (2014). Genetic and genomic tools for the marine annelid *Platynereis dumerilii*. *Genetics*, 197(1), 19-31.

Zonana HV (1961) Fine Structure of the squid Retina. *Bulletin of the Johns Hopkins Hospital*, **109**: 185-205

Zuber ME, Gestri G, Viczian AS, Barsacchi G, and Harris WA (2003). Specification of the vertebrate eye by a network of eye field transcription factors. *Development*, 130(21), 5155-5167.

## Figures

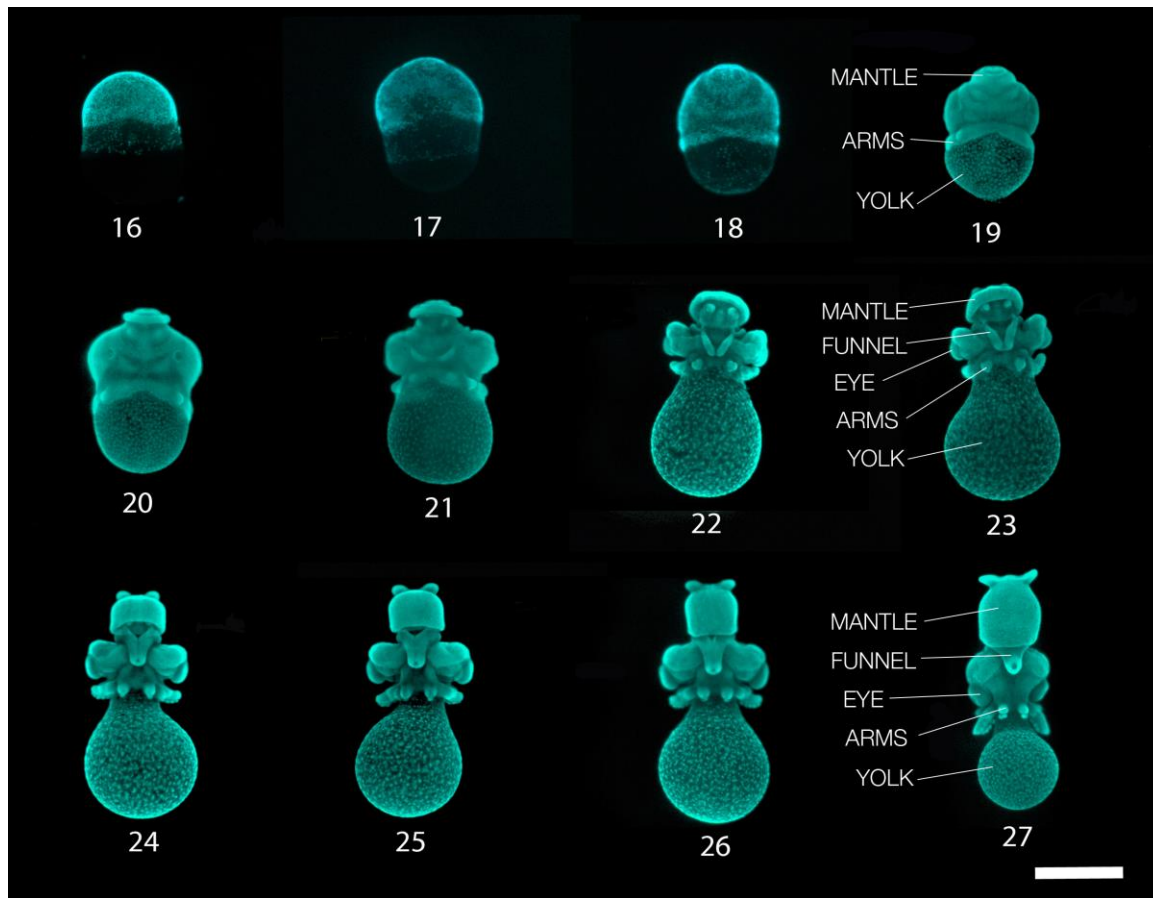

**Figure 1: Embryonic Stages and Transcriptome**

Sytox-Green stained *Doryteuthis pealeii* embryos Stages 16-27 (Arnold, 1965). Posterior view. Each stage sequenced to generate a whole-embryo transcriptome. Scale bar = 1000um

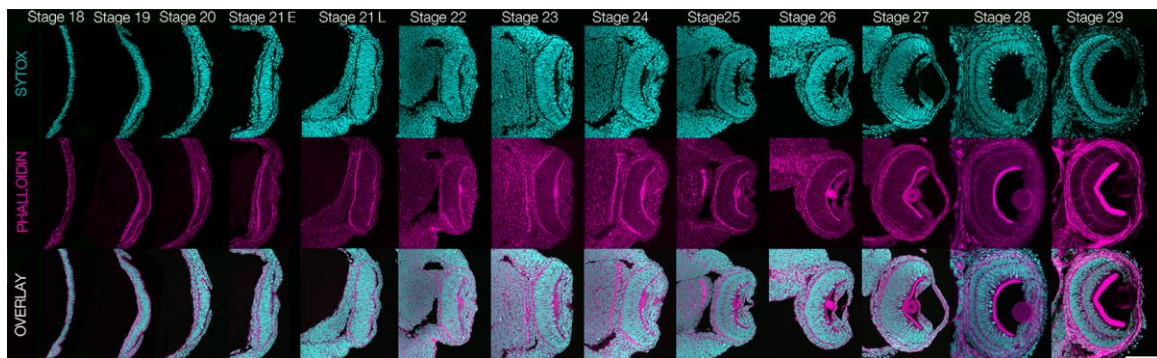

## Figure 2: Staging Series of Eye Development

Stages 18-29 in cross-section. Anterior of the animal is up in all images. Stage 18: Placode has formed and the lateral edge of the lip is present. Stage 19: Medial and lateral lip are present and placode neuroepithelium formed. Stage 20: Lips of the placode are apposed and apical divisions detected in the retina. Stage 21 Early: Placode lips fuse forming the optic vesicle. Stage 21 Late: Pseudostratified epithelium of the retina grows along the apical-basal axis. Stage 22: Retina begins to curve and lens is apparent. Stage 23: Plexiform layer in the optic lobe is apparent. Stage 24: Lentigenic cell morphology becomes obvious. Stage 25: The lens has grown and is teardrop shaped, Outer segment formation of photoreceptor cells beginning. Stage 26: F-Actin accumulation in the lentigenic cells. Stage 27: Basal membrane in the retina begins to form and photoreceptor nuclei segregate at the posterior retina. Stage 28: The basal membrane and a layer of photoreceptor cell nuclei span the the retina. Vasculature is present. Stage 29: Photoreceptor cell layer has grown significantly and outer segments are substantial. Scale bar = 50um. DNA (Sytox-Green) and F-Actin (Phalloidin).

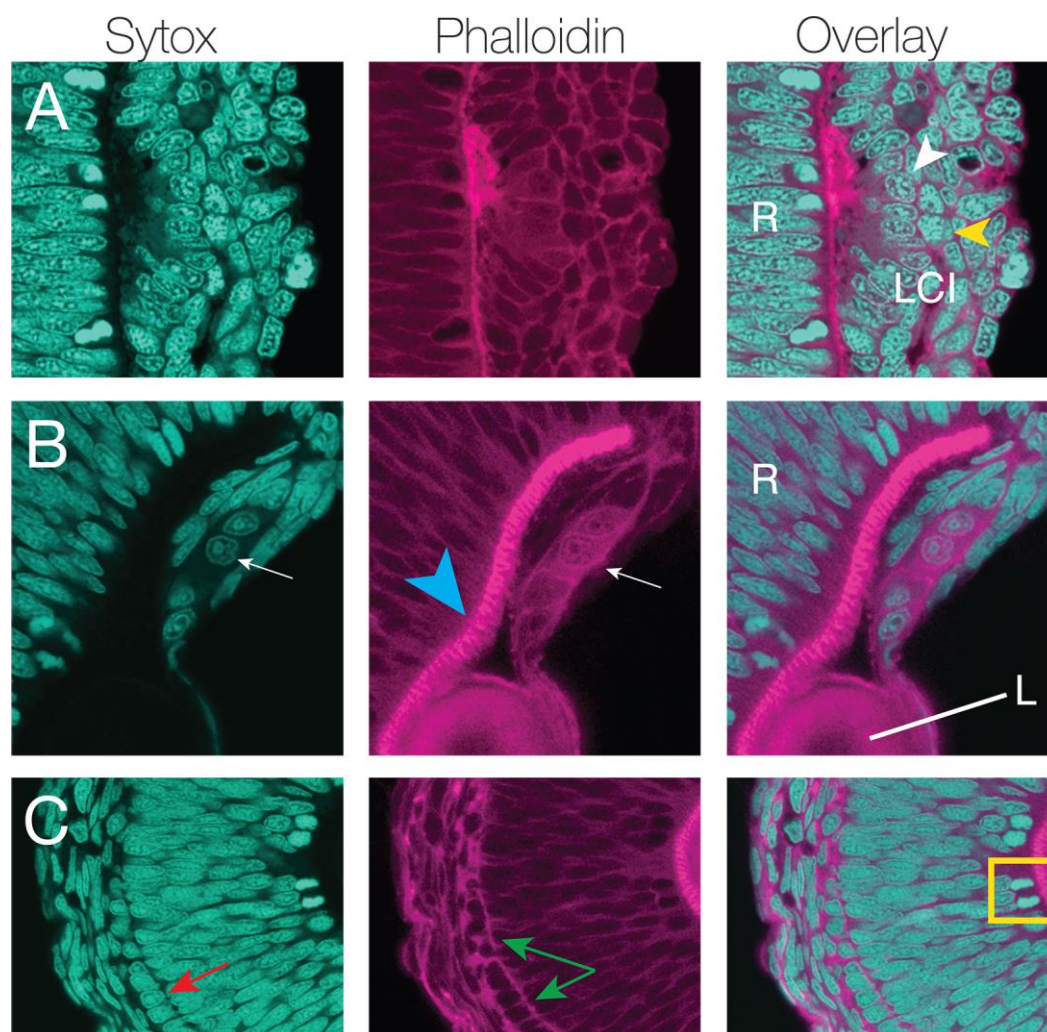

**Figure 3: High Magnification Staging Series Images**

Sytox-Green (DNA) and Phalloidin (F-actin). A) Stage 22. Retina to the left (R), lens and iris to the right (LCI). White arrowhead: Primary lentigenic cells. Yellow arrowhead: Secondary lentigenic cells. B) Stage 27. Retina (R) and Lens (L). F-Actin enrichment in outer segments (Blue arrowhead). White arrow: lentigenic cells. C) Stage 27 retina. Red arrow: Photoreceptor nuclei segregating at the posterior of the retina. Green arrows: the basal membrane. Yellow box surrounds cells that have just divided on the apical side of the retina.



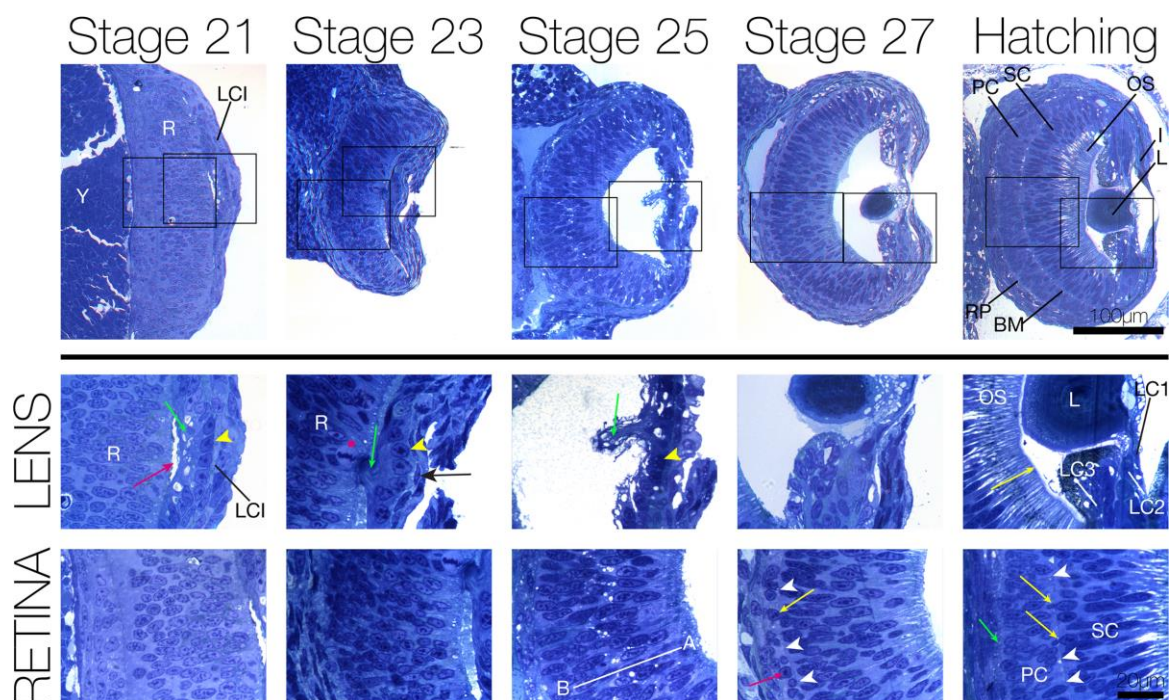

**Figure 4: Histological Staging Series**

Boxed regions are high-magnification images of developing lens and retina shown below each stage. Stage 21 Lens (L): Yellow Arrowhead: Lentigenic cells, Green Arrow: Lentigenic cell processes, Pink Arrow: Formation of vitreous cavity. Stage 23 Lens: Pink Asterisk: Mitotic cell on apical side of retina, Black Arrow: Primary lentigenic cells (LC1), Yellow Arrowhead: Secondary lentigenic cells (LC2), Green Arrow: Lentigenic cell processes. Stage 25 Lens: Yellow Arrowhead: Secondary lentigenic cells, Green Arrow: Lentigenic cell processes and lens. Stage 25 Retina (R): Apical (A) and Basal (B) axis is labeled. Stage 27 Retina: Pink Arrow: Newly born photoreceptor nuclei (PC), White Arrowheads: Basal membrane (BM), Yellow Arrow: Nucleus crossing the basal membrane. Hatching Lens: Yellow Arrow: Limiting membrane. Hatching Retina: White Arrowheads: Basal membrane, Yellow Arrows: Nuclei crossing the basal membrane, Green Arrow: Retina Plexiform Layer. *I: Iris, LC3: Tertiary lentigenic cells, LCI: Lens, Cornea and Iris, OS: Outer segment (also known as Distal Segment), SC: Support Cell layer, Y: Yolk.* Low magnification scale = 100µm, High magnification scale = 20 µm

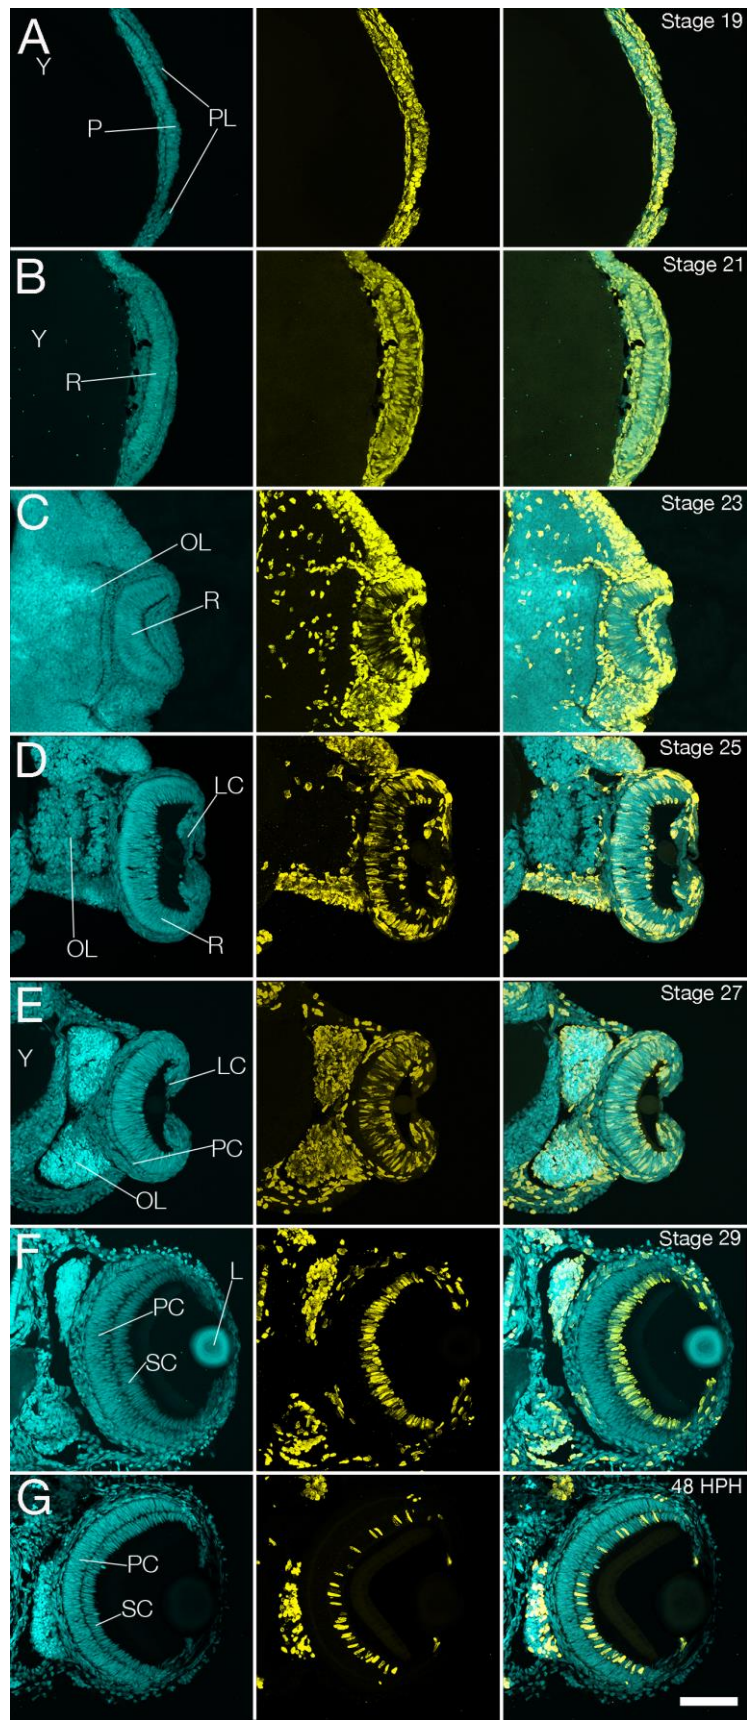

## Figure 5: BrdU Incorporation Assays Reveal Spatial Patterns of Cell Proliferation During Retina Development

Sytox-Green (DNA), BrdU (yellow), Embryos were pulsed with BrdU for 3 hours and immediately fixed. A-C) BrdU incorporation is detected broadly throughout the retina at Stages 19, 21, and 23. D) BrdU incorporation begins to segregate to cells on the apical and basal sides of the epithelium. E) Photoreceptor cell nuclei located behind the basal membrane no longer incorporate BrdU. F) Support cells and lens and iris continue to incorporate BrdU. G) Two days post-hatching, support cell layer and lentigenic cells continue to incorporate BrdU. Scale = 50um. *L: Lens, LC: Lentigenic Cells, OL: Optic Lobe, PC: Photoreceptor Cell nuclei, P: Placode, PL: Placode Lip, R: Retina, SC: Support Cell nuclei.*



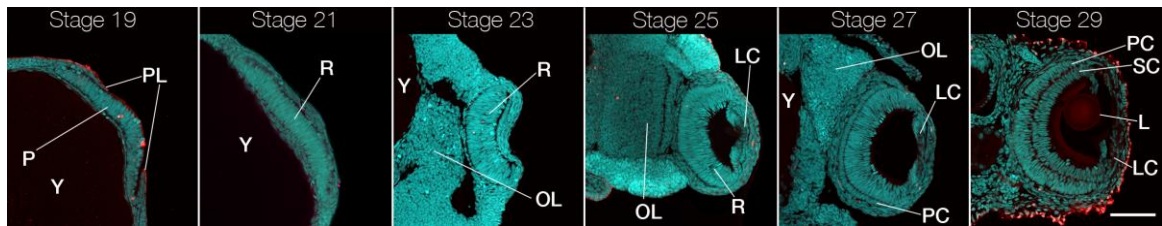

## Figure 6: TUNEL assays

Stages 19, 21, 23, 25, 27 and 29 TUNEL assay. Sytox-Green labeled DNA (cyan) and TUNEL (red). Few TUNEL<sup>+</sup> cells are detected. Red cells at Stage 29 are in the dermal tissue and likely background from the iridophores. *L*: Lens, *LC*: Lentigenic Cells, *OL*: Optic Lobe, *P*: Placode, *PC*: Photoreceptor Cell nuclear layer, *PL*: Placode Lip, *R*: Retina, *SC*: Support Cell nuclear layer, *Y*: Yolk.

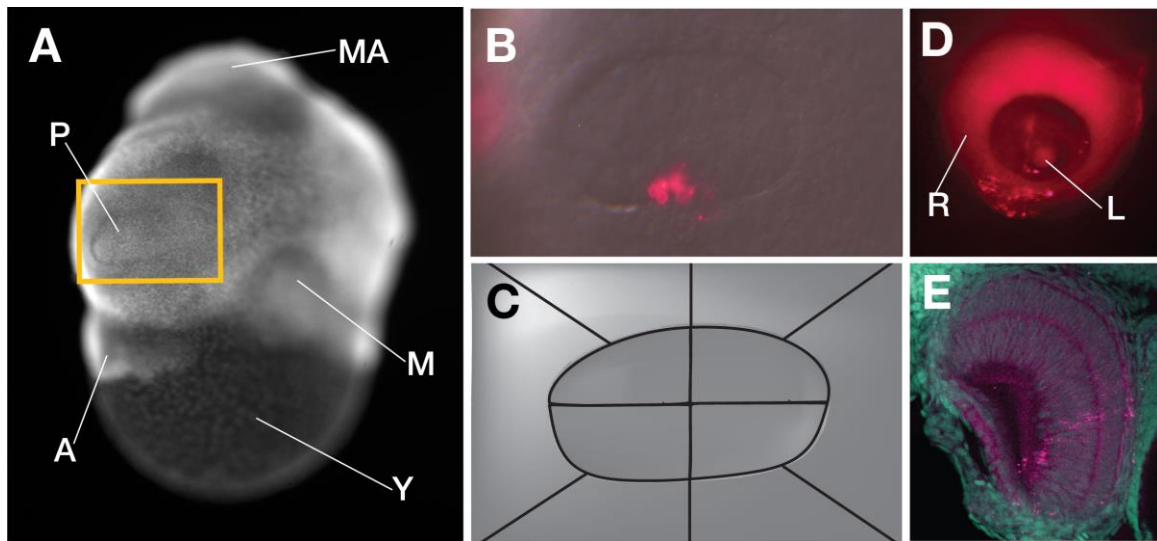

### Figure 7: DiI Lineage Tracing Experimental Design

A) Stage 18 eye placode (gold box). B) DiI labeling. C) Labeled cells documented on map of the placode region. At least 20 embryos labeled in each of the 10 regions. D) Embryos grew until hatching stage, fixed and documented in whole mount. Lateral view of the eye shown with labeled cells in the retina. E) Embryos cryosectioned into serial 12um sections, counterstained with Sytox-Green, and documented using confocal microscopy. In this example, DiI label is detected in the support cell layer and the photoreceptor layer of the retina. *A: Arms, M: Mouth, MA: Mantle, P: Placode, Y: Yolk*

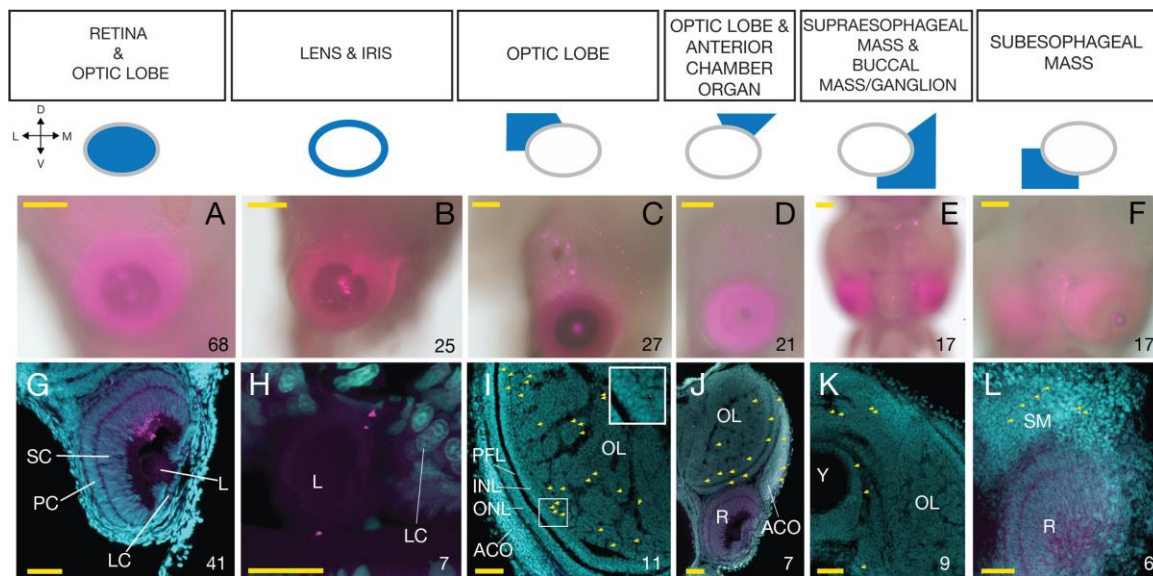

### Figure 8: DiI Lineage Tracing Results

Representative examples of progenitor domains identified in the placode stage lineage tracing experiment. Cartoons at the top of the figure show the Stage 18 location of cells. Below each cartoon is whole-mount documentation (A-F) and sectioned examples (G-L). DNA labeled with Sytox-Green. Yellow arrows highlight DiI puncta. Inset (I): high magnification image of puncta. Replicates are indicated on each image. A,G) Cells within the placode are the only cells that incorporate into the retina. B,H) The placode lip generates the lens and iris. C,D,E,F,I,J,K,L) Regions surrounding the placode and placode lip incorporate into specific brain regions. Scale bar = 100um in whole-mount images, 50um in sectioned images, with the exception of the lens and iris image where the scale is 25um. ACO: Anterior Chamber Organ, INL: Inner Nuclear Layer, L: Lens, LC: Lentigenic Cells, OL: Optic Lobe, ONL: Outer Nuclear Layer, PC: Photoreceptor Cell nuclear layer, PFL: Plexiform Layer, R: Retina, SC: Support Cell nuclear layer, SM: Subesophageal Mass, Y: Yolk.



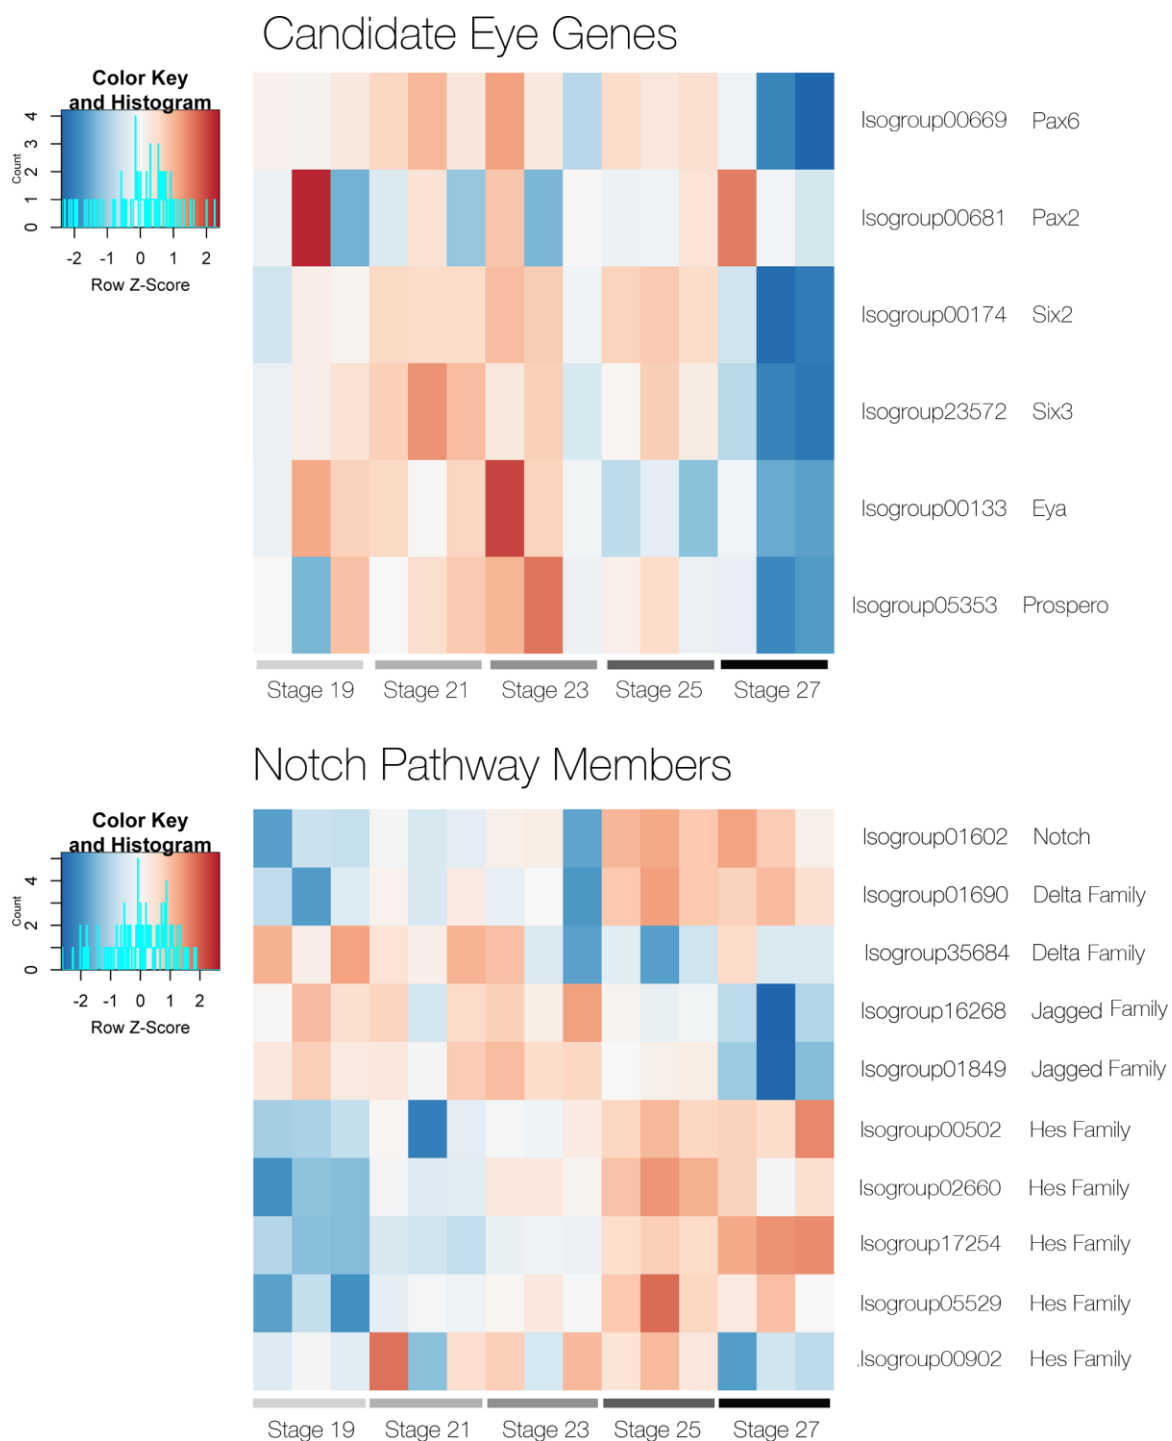

**Figure 10: Candidate gene RNA-seq Heatmaps**

Variance-stabilized transformed heatmaps for RDN genes, eye candidate genes, and Notch Pathway members. Genes identified by Uniprot annotation and reciprocally Blasted against *Drosophila* and *Mus musculus* non-redundant

protein database to confirm annotation. Multiple Delta, Jagged, and Hes family members were identified. Phylogenetic trees constructed for all eye candidate genes, and Notch isogroup01602 and Hes isogroup00502 to confirm orthology (Figure S3).

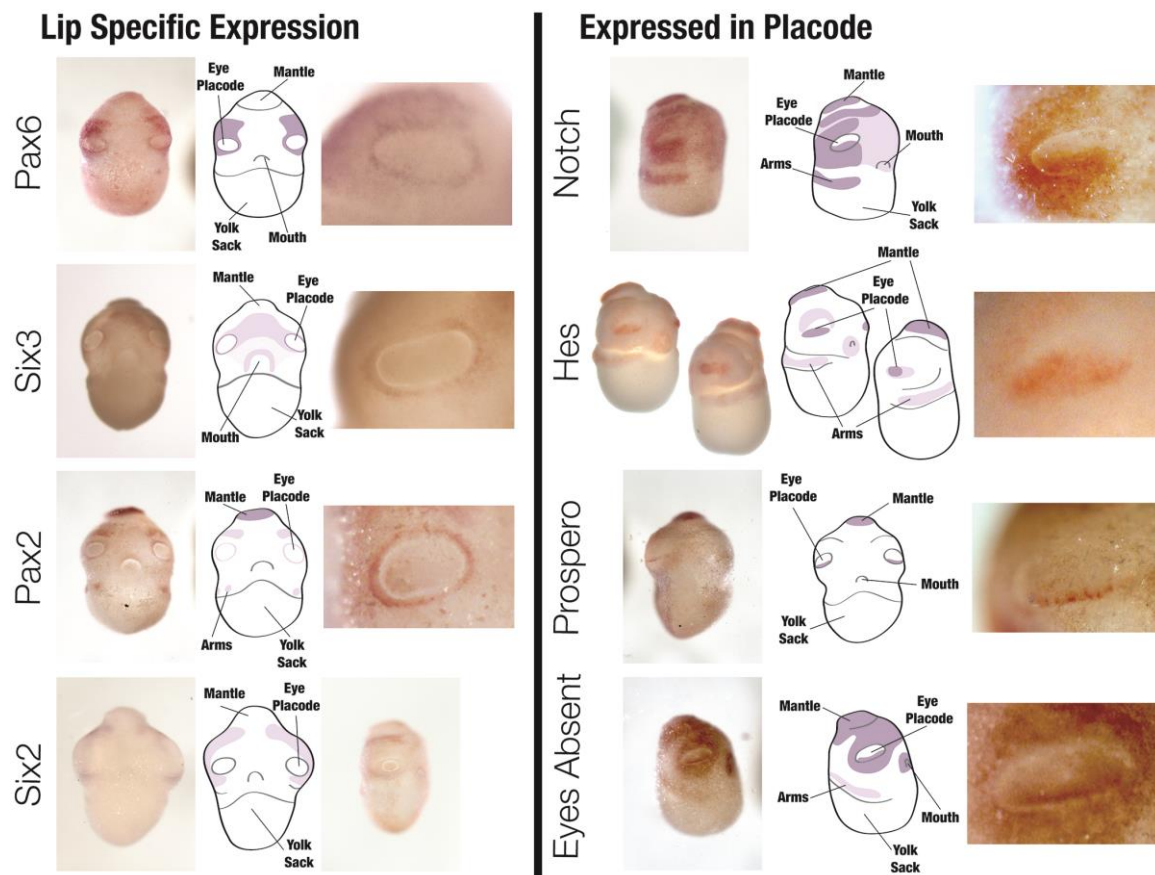

**Figure 11: Expression Analysis of Candidate Eye Genes at Placode Stages**

*In situ* hybridization in early stage embryos. Cartoon depictions of the expression patterns next to the whole embryo images. Higher magnification images shown of eye placode for all *in situs* except *Six2*, where a lateral image of a Stage 20 embryo is shown. *Six2* expression is restricted from the eye at Stage 20. *Pax6*, *Six3*, *Pax2* and *Six2* are expressed in tissue surrounding the placode at Stage 18 and excluded from the placode proper. *Notch*, *Hes*, *Prospero* and *Eya* are all expressed in the placode at Stage 18. *Hes* expression is shown for both Stage 18 (left) and 19 (right). *Hes* expression changes quickly from the ventral half of the placode at Stage 18 to the entire placode at Stage 19. The high magnification image is Stage 18.



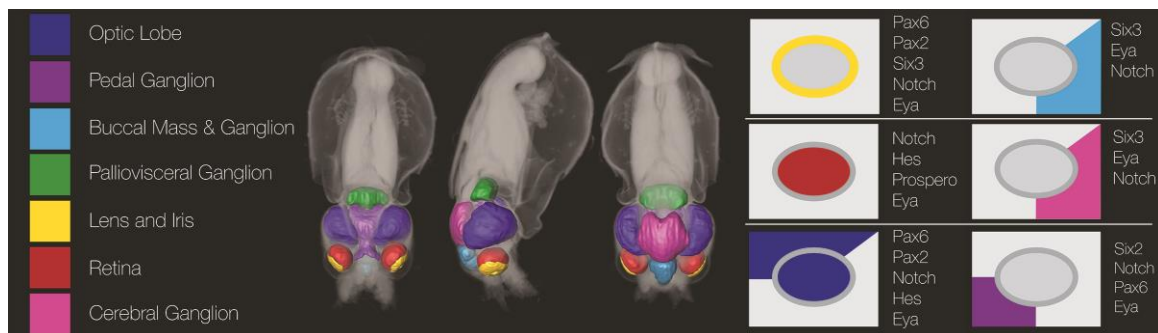

**Figure 12: Summary of DiI Lineage Tracing and Gene Expression Analyses:**

The Stage 18 fate map is color-coded with corresponding cell fates highlighted on the hatchling stage model. The model was generated from segmented reconstructions of MicroCT scan data. Placode stage gene expression profiles are correlated with the regions giving rise to distinct eye and brain regions.



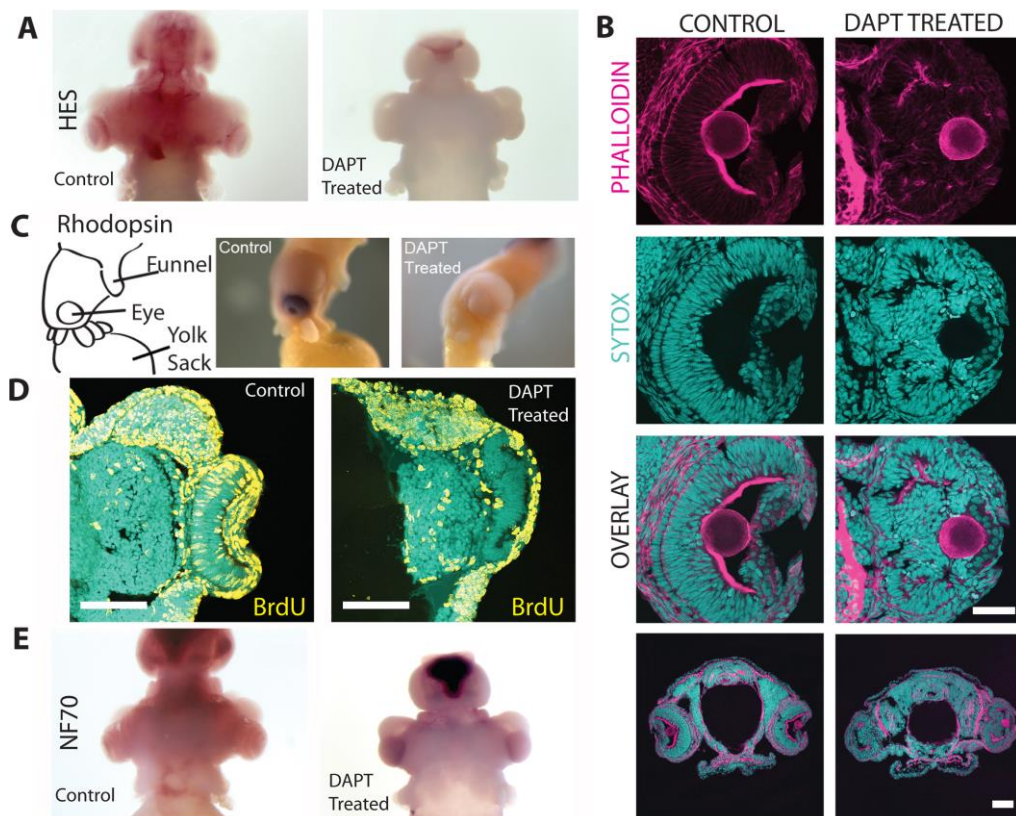

**Figure 13: Notch Activity is Required to Maintain Progenitor Proliferation in the Squid Retina.**

A) *Hes* expression is lost as a result of DAPT exposure (40uM). *In situ* hybridization at Stage 27 for *Hes* in DMSO and DAPT treated embryos (anterior view). Mantle staining is a common background in cephalopods. B) DAPT treated embryos (20uM) show disorganization and defects in photoreceptor differentiation. Scale bar = 50um for high magnification and 100um for low magnification. C) DAPT treated retinas lack *rhodopsin* expression suggesting a loss of differentiated photoreceptors. Lateral view of DMSO and DAPT (20uM) treated embryos Stage 27. D) DAPT treated embryos express the neural marker *NF70*. Anterior view of DMSO and DAPT (20uM) treated embryos Stage 27. E) DAPT treated retinas fail to incorporate BrdU. Cross-sections of DMSO and DAPT (20uM) treated embryos. Embryos treated at Stage 21 for 24 hours, exposed to BrdU for 3 hours and fixed immediately. Scale bar = 50 um

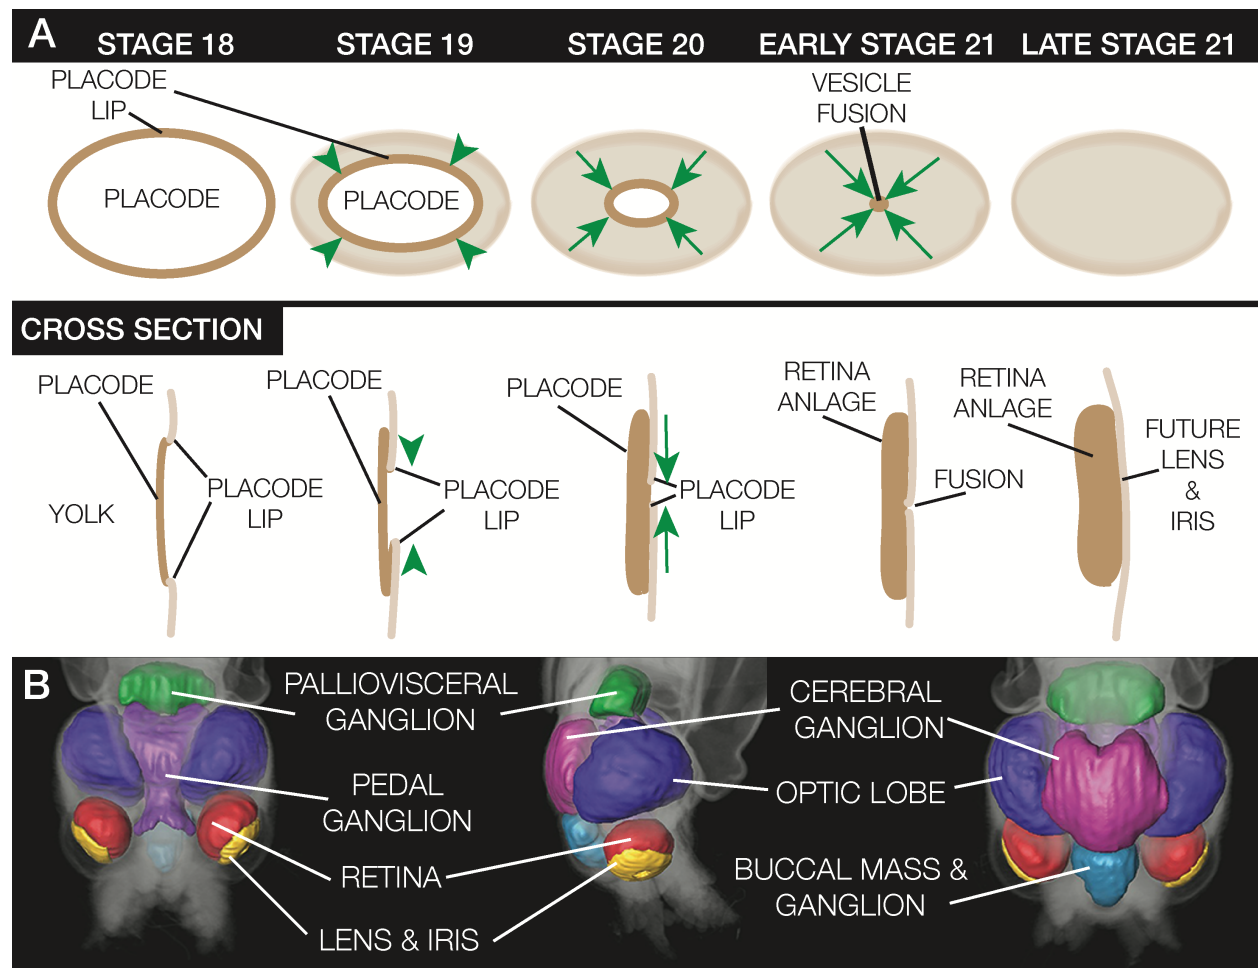

**Figure S1: Model of Eye Vesicle Closure and High Magnification Images of Brain Regions Identified by Lineage Tracing**

A) Graphical representation of the first steps of eye formation in the squid, eye placode and placode lip formation through placode internalization. Top row is viewing the eye straight on, second row is a cross-section view of each stage respectively.

B) High magnification of brain regions of the squid at hatching.

**Figure S2: Expanded *In situ* hybridization Gene expression Analyses**

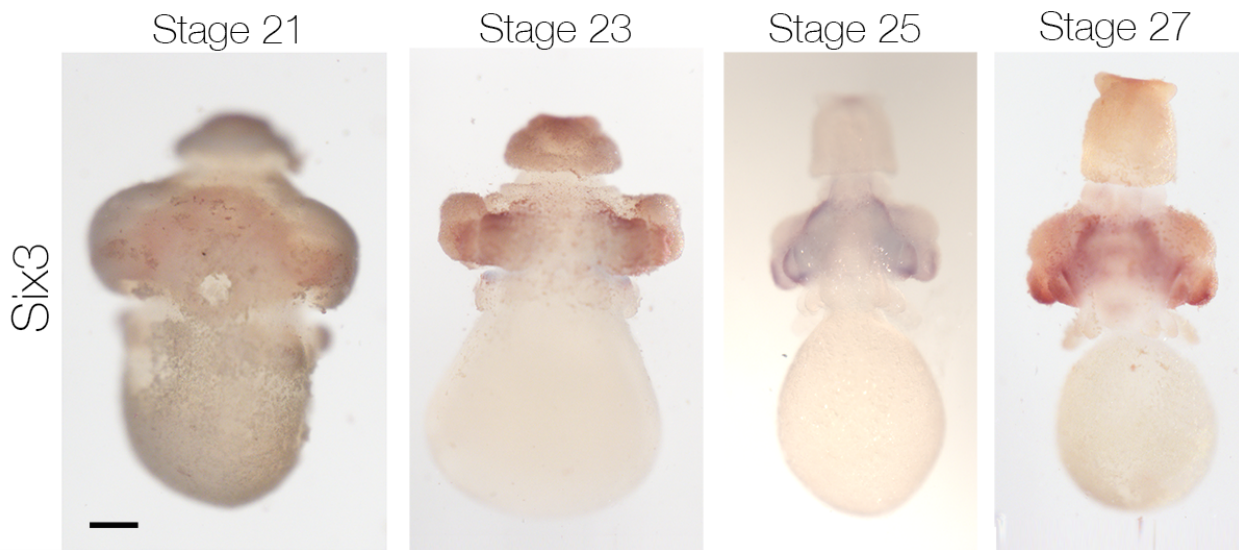

**A) *In situ* hybridization for *Six3***

*In situ* hybridizations for *Six3* expression at Stages 21, 23, 25, and 27. Expression is in the developing cerebral ganglia tissue and parts of the developing eye. Expression in the eye is apparent at Stage 21 and 23. Lens and cornea and iris expression is apparent in at Stage 25. At Stage 27 this expression has expanded beyond the anterior of the eye. All embryos are shown from the anterior perspective. Scale = 100  $\mu$ m

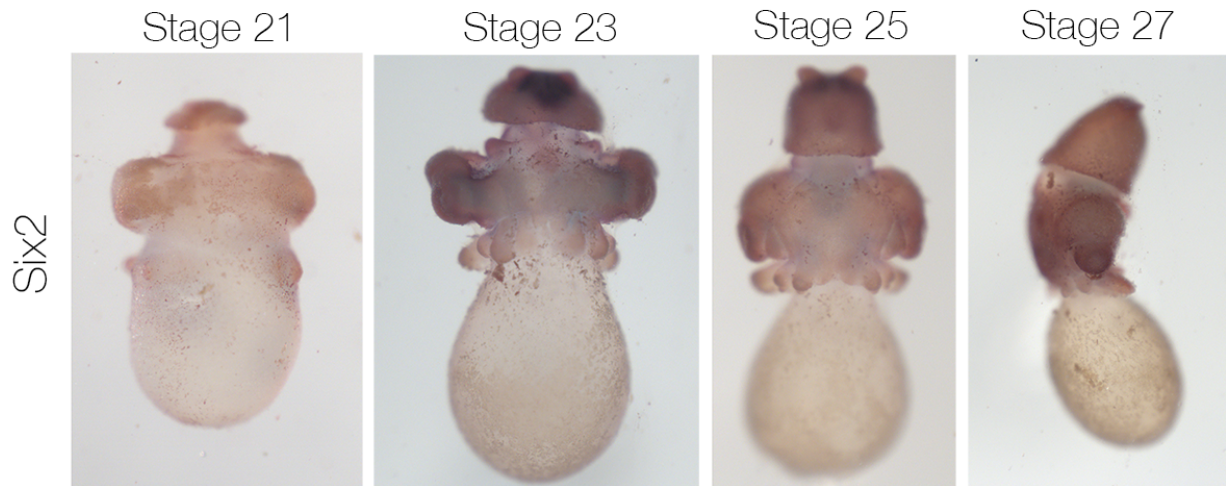

**B) *In situ* hybridization for *Six2***

*In situ* hybridizations for *Six2* expression in Stages 21, 23, 25 and 27. Eye specific expression is apparent at later stages of development, noticeably at Stage 27. All embryos are shown from the anterior with the exception of Stage 27, which is a lateral view.



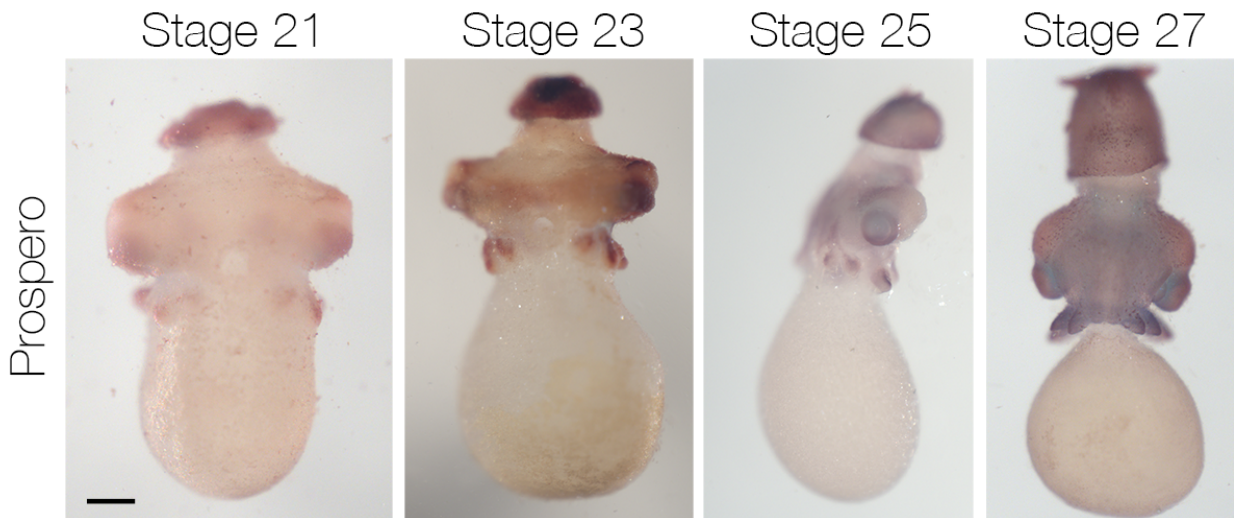

### C) *In situ* hybridization for *Prospero*

*In situ* hybridization for *Prospero* expression in Stages 21, 23, 25, and 27. *Prospero* expression is apparent in the eye, mantle and developing arms at all stages. Expression in the cerebral ganglia is apparent at Stage 23 and Stage 25. Expression is diffuse at Stage 27. All embryos are shown from the anterior with the exception of Stage 25, which is a lateral view, anterior left. Scale = 100um

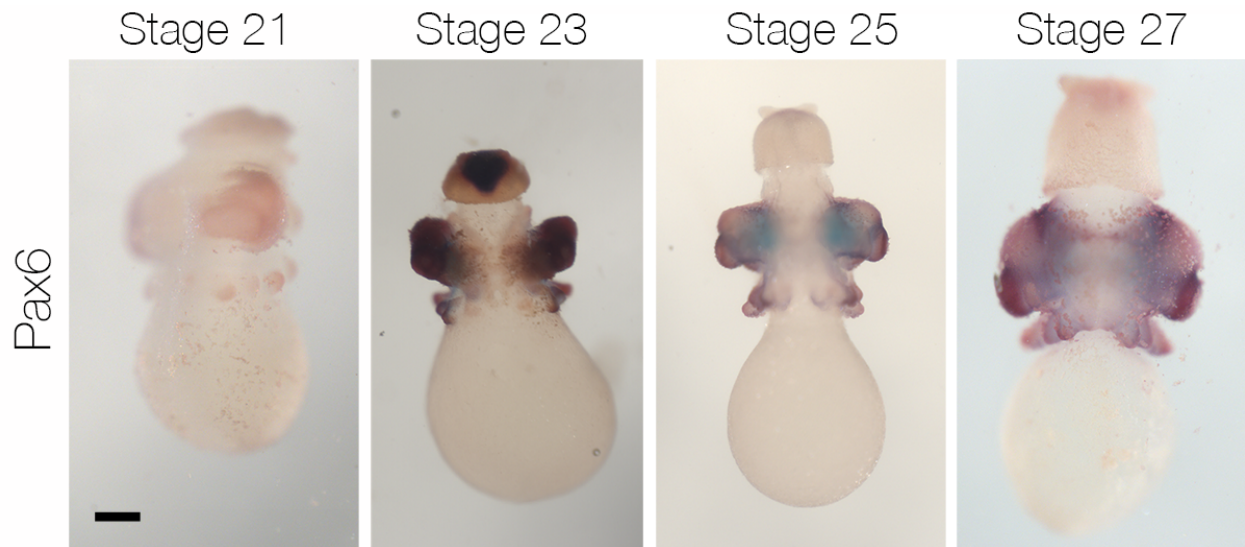

#### D) *In situ* hybridization for *Pax6*

*In situ* hybridization for *Pax6* expression at Stages 21, 23, 25 and 27. Expression in the eye and optic lobe tissue is apparent throughout development. Expression in the arms is also apparent. All embryos are shown from the anterior with the exception of Stage 21, which is shown from an anterolateral perspective. Scale = 100um

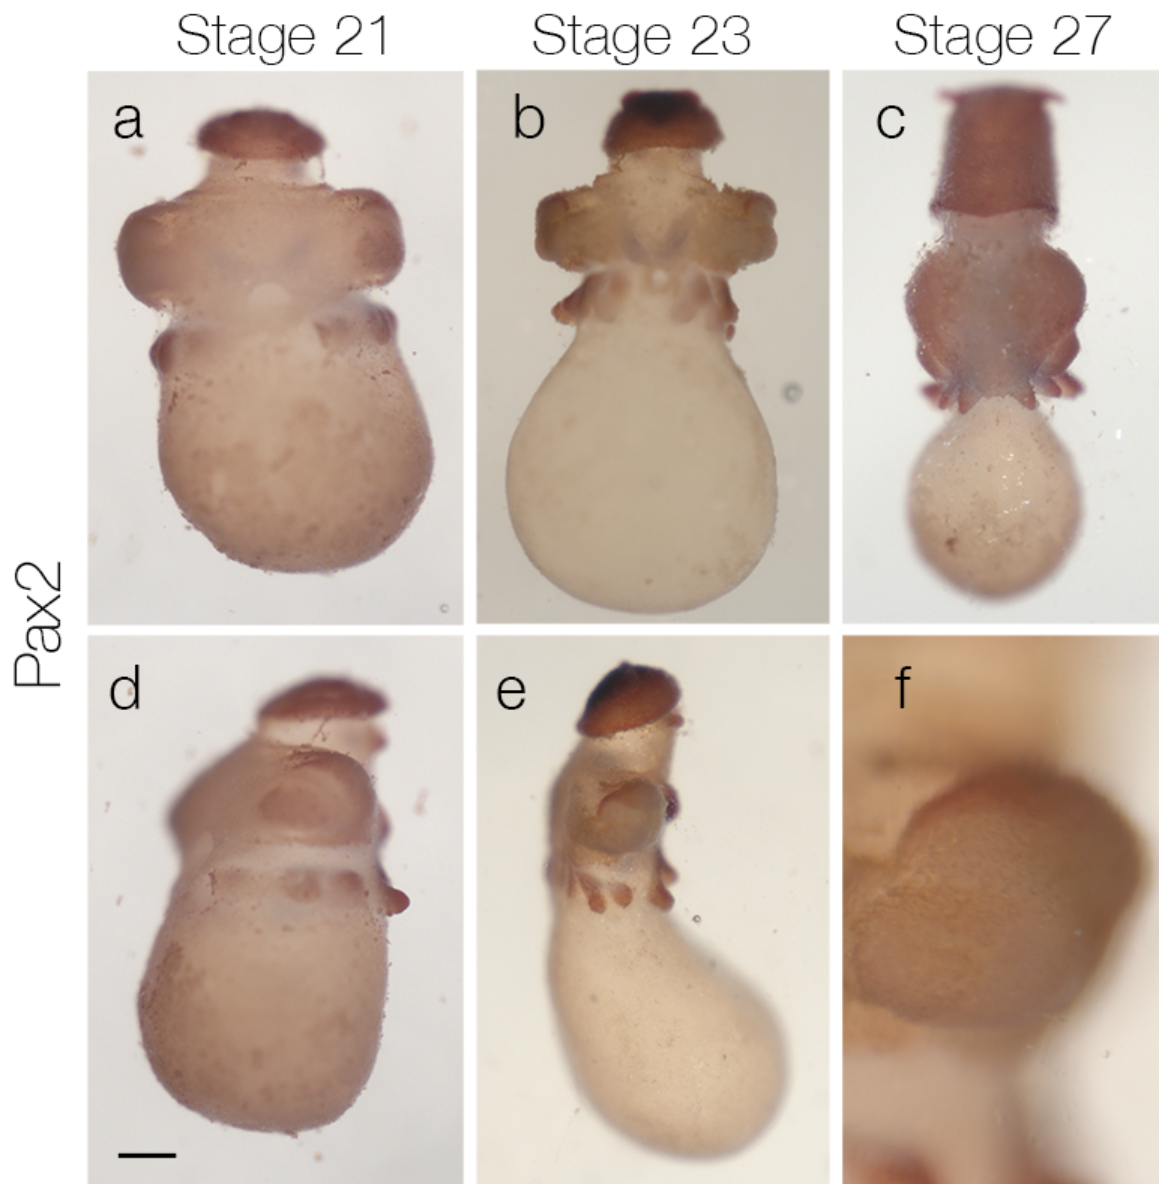

### E) *In situ* hybridization for *Pax2*

*In situ* hybridizations for *Pax2* expression for Stages 21, 23 and 27. a,d) *Pax2* expression at Stage 21 is apparent in the mantle and developing eye and arms, as well as tissue incorporating into the developing optic lobe. a) is an anterior view and d) is a anterolateral view. b,e,f) Expression at Stage 23. Expression is apparent in the arms and in the tissue dorsal to the retina. This tissue may incorporate into the anterior chamber organ. b) Anterior view, e) lateral view, f) high magnification image of the eye in e). c) Diffuse expression at Stage 27. Scale for the low magnification images = 100µm

# Hes

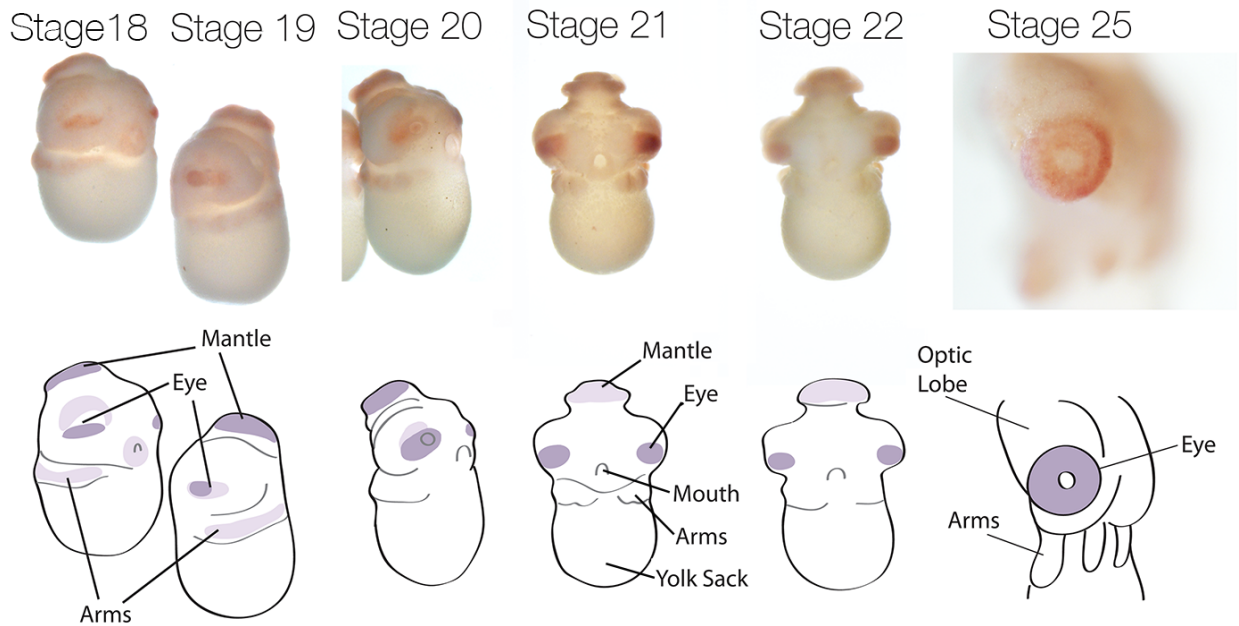

## F) *In situ* hybridization for *Hes*

*In situ* hybridization for *Hes* expression for Stages 18, 19, 20, 21, 22, and 25. Expression is robust in the developing retina at all stages. Some expression is apparent in the developing mantle at early stages. Stage 18 and 20 are shown antrolaterally. Stage 19 is shown laterally, Stage 21 and Stage 22 are shown from the anterior and stage 25 is a lateral view.



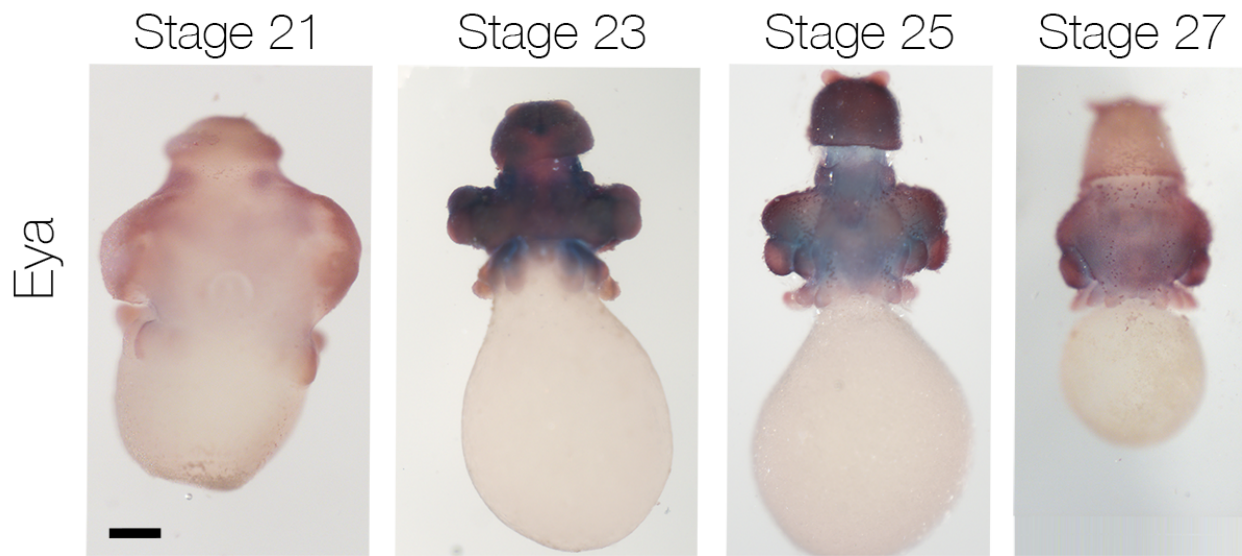

#### **G) *In situ* hybridization for *Eya***

*In situ* hybridization for *Eya* expression in Stages 21, 23, 25 and 27. At Stage 21 expression is apparent in lens surrounding the developing lens tissue, as well as the optic lobe and palliovisceral primordial. Expression is also apparent in the developing arms and mantle but distinctly excluded from the cerebral ganglion region. Expression at Stage 23 and 25 is broad and robust. At Stage 27 expression decreases in the mantle. Scale = 100um

**Figure S3: Maximum Likelihood Phylogenetic Analysis:** All trees are a consensus from 1000 bootstrapped ML trees. Bootstrap scores are indicated on the branches. *Doryteuthis pealeii* sequences are highlighted in magenta. All sequence information for the trees can be found in Supplemental Table 2.

A) Maximum Likelihood Phylogenetic Analysis of Six Genes: The *D. pealeii* Six2 gene formed a clade with other Six1/2 genes and was most closely related to the previously identified Six gene in *Euprymna scolopes*. *D. pealeii* Six3 formed a strongly supported clade with other Six3/6 genes.

B) Maximum Likelihood Phylogenetic Analysis of Prospero Genes: *D. pealeii* Pros forms a clade with other Ecdysozoans *Tribolium* and *Drosophila* Pros.

C) Maximum Likelihood Phylogenetic Analysis of Pax Genes: Our phylogenetic analysis showed *D. pealeii* Pax6 most closely related to the bobtail squid *Euprymna scolopes* Pax6, while *D. pealeii* Pax2 formed a clade with other Pax2/5/8 proteins, most closely related to *C. elegans* Pax2 and Egl38.

D) Maximum Likelihood Phylogenetic Analysis of Notch Genes: *D. pealeii* Notch forms a strong clade with other Notch proteins, forming a small clade with other molluscs.

E) Maximum Likelihood Phylogenetic Analysis of Hes Genes: *D. pealeii* Hes forms a clade including *Drosophila* Hairy and Deadpan.

F) Maximum Likelihood Phylogenetic Analysis of Eya Genes: *D. pealeii* Eya is most closely related to the previously identified Eya gene in *Euprymna scolopes*.

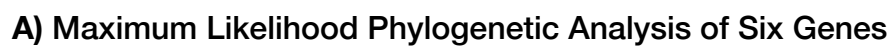

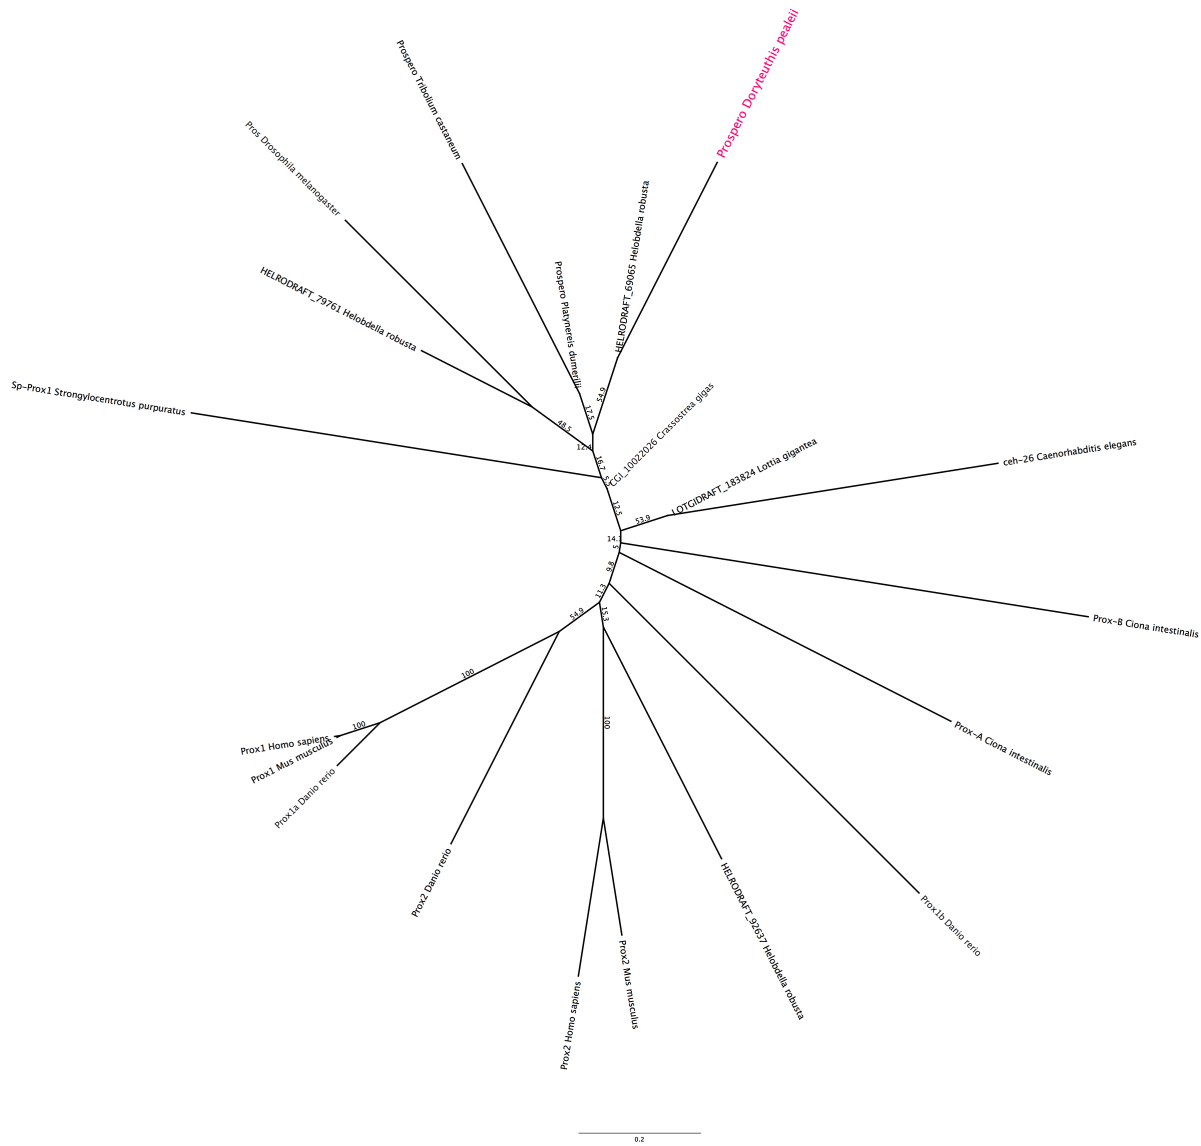

**B)** Maximum Likelihood Phylogenetic Analysis of Prospero Genes

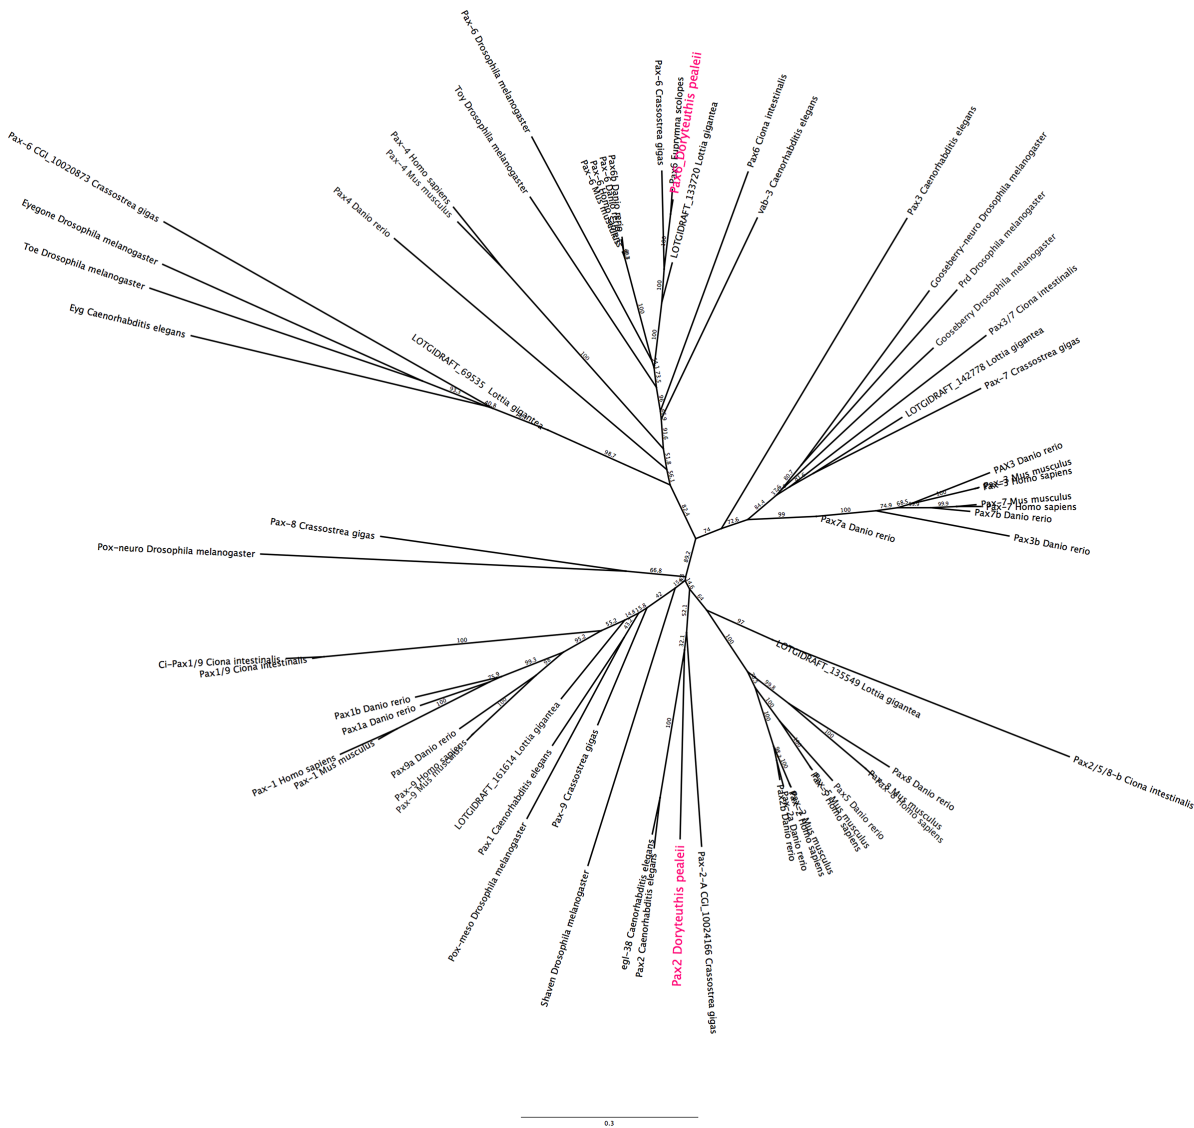

C) Maximum Likelihood Phylogenetic Analysis of Pax Genes

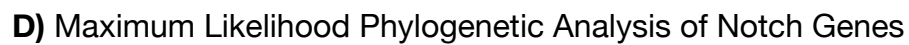

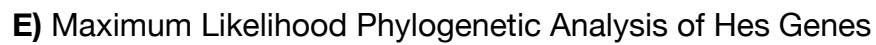

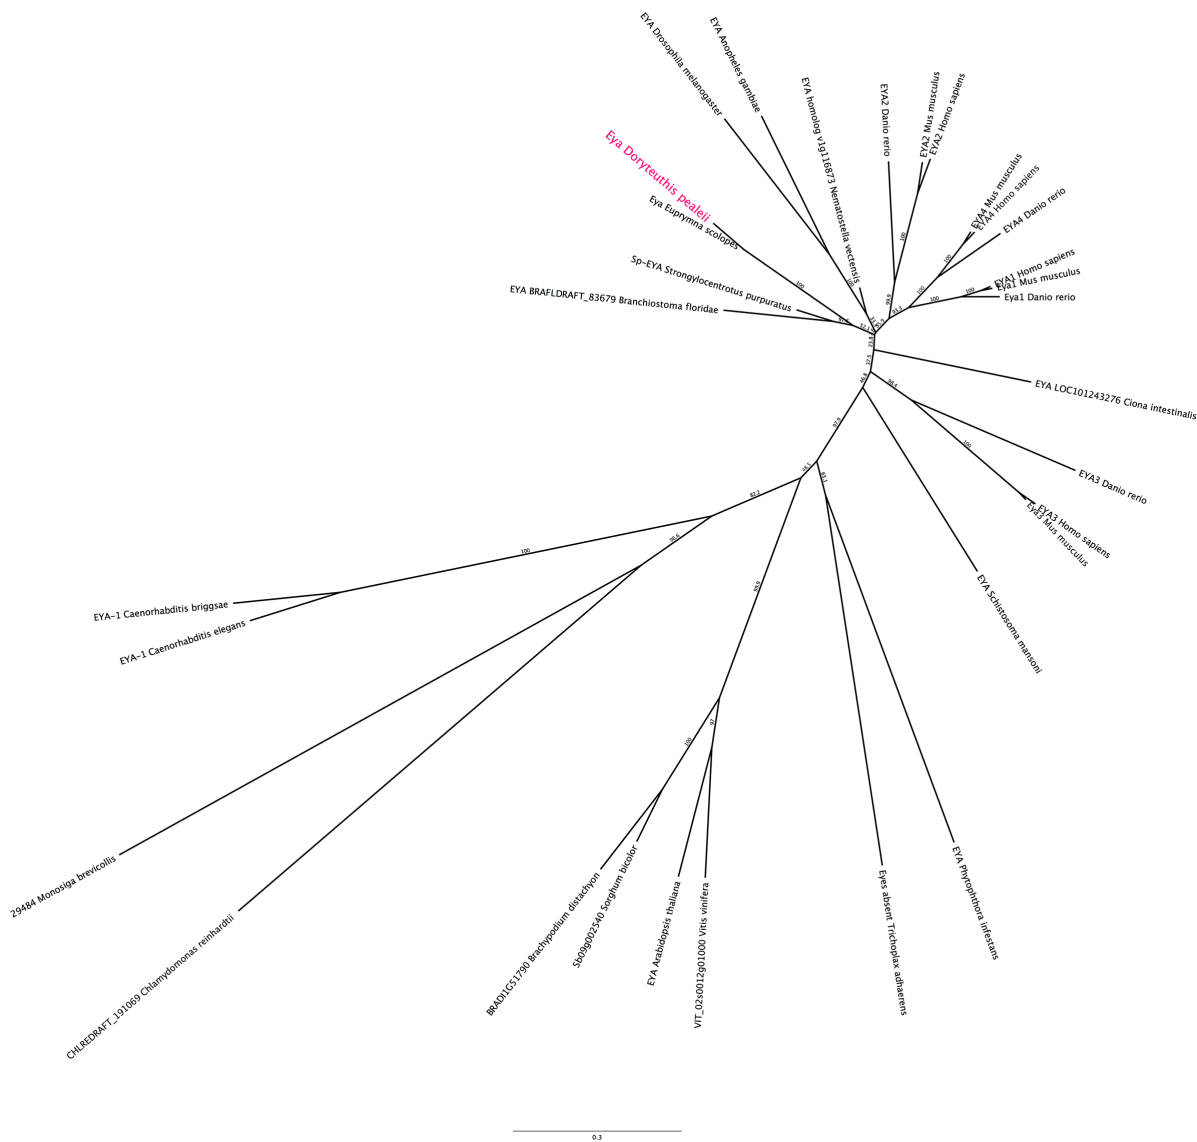

**F)** Maximum Likelihood Phylogenetic Analysis of Eya Genes



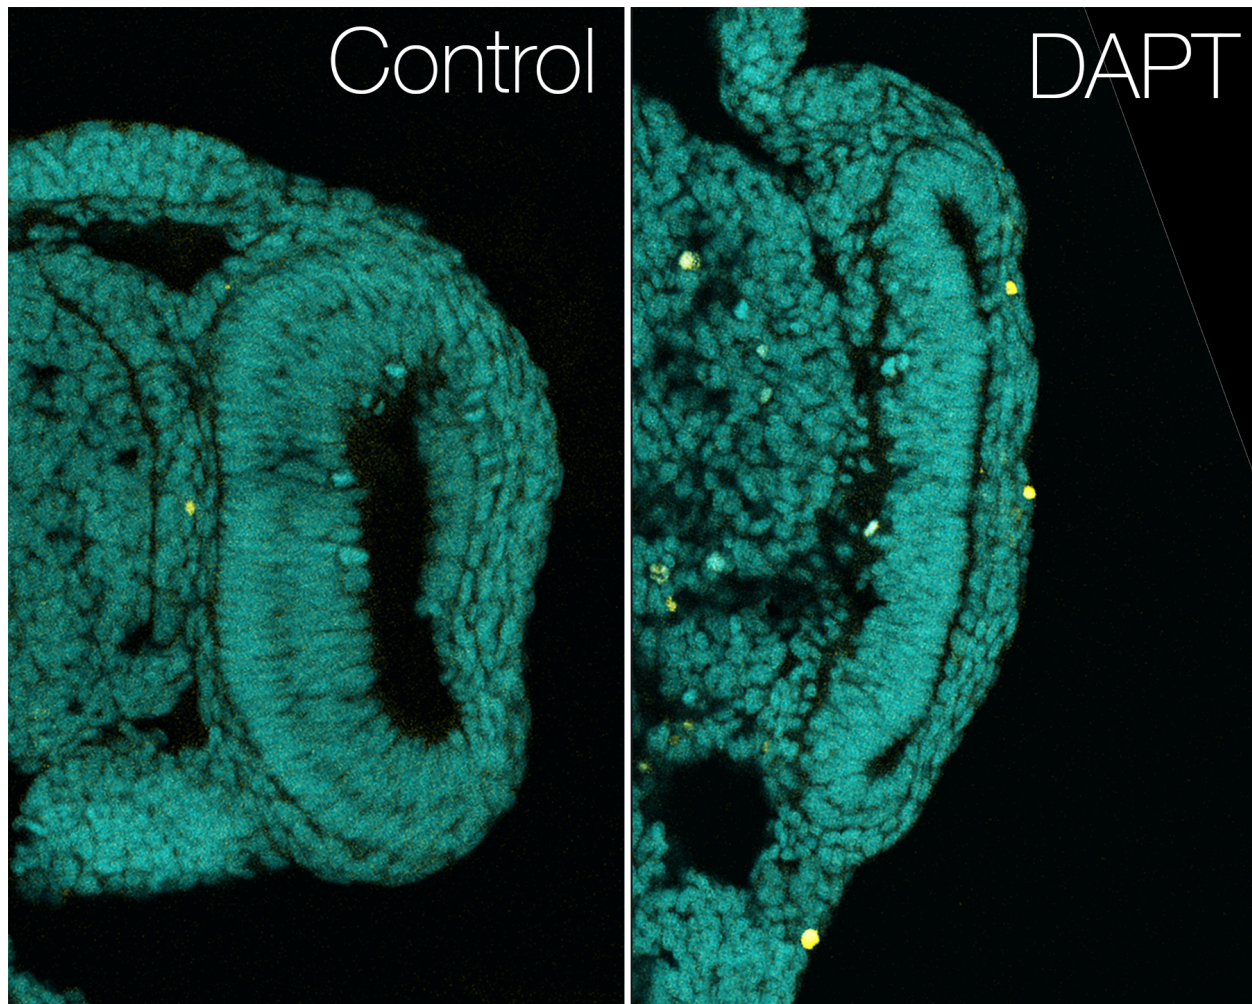

**Figure S4: TUNEL staining of DAPT-treated embryos**

Cross-section of 24 hour DAPT (20uM) and DMSO treated embryos. Embryos were treated at Stage 21 and fixed 3 hours post-treatment. Sytox-Green (cyan) and TUNEL (yellow).

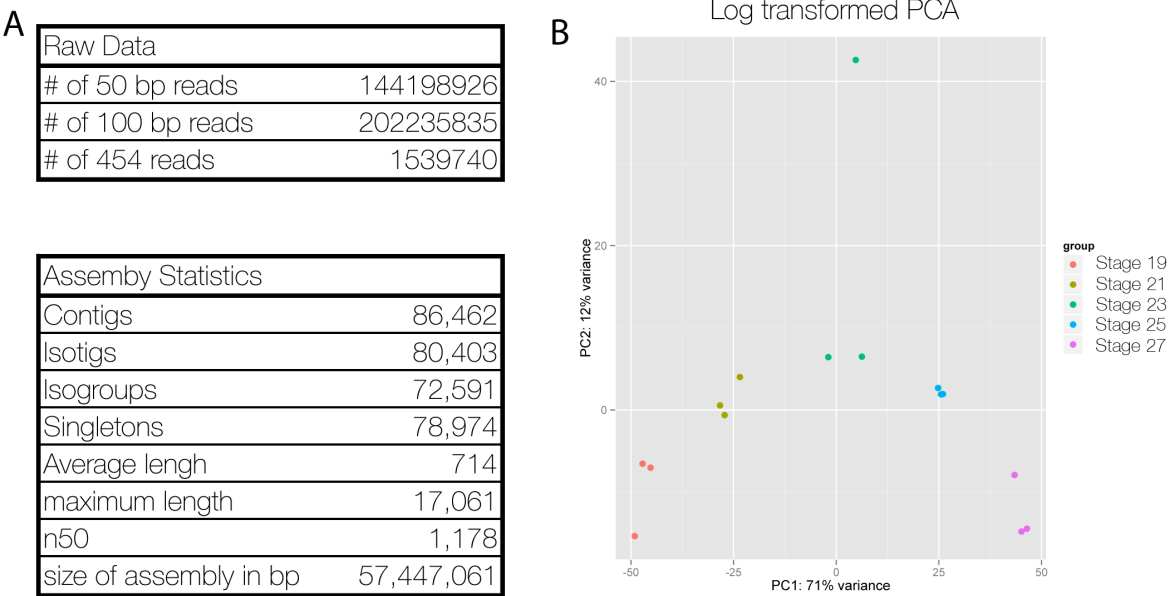

**Figure S5: Sequencing raw data and assembly and RNA-seq statistics**  
Raw read counts and statistical analysis of the whole-embryo transcriptome. (B) Log transformed Principal Component Analysis graph of time-course RNA-seq data.

Supplemental Table 1: Primer Sequences

| Gene Name        | Primers Sequence           |
|------------------|----------------------------|
|                  |                            |
| Pax6             | AGCAAGATTCTCGGAMGNTAYTAYGA |
| Pax6             | TGCAAAAACGTCTGGRTARTGNGT   |
|                  |                            |
| NF70             | CGAATGGGGAAAAGAAACCTC      |
| NF70             | TGTCTGCGGTTTTTCAGCGTC      |
|                  |                            |
| Optix/Six3       | TTCTGGGCAGCGGAAACTTC       |
| Optix/Six3       | AAGATAGTGGTGACATTGAACGGC   |
|                  |                            |
| Sine Oculis/Six2 | TTGTGGTCAAACCTGTGGCTTC     |
| Sine Oculis/Six2 | TGCGAGCACCTACACAAAAACG     |
|                  |                            |
| Eyes Absent      | AAGAGAACGGCTTCACCTGACC     |
| Eyes Absent      | GGAGGAGGTCATCATTGTCACTGC   |
| Eyes Absent      | TCGGTCACTTTGGGACTTTTGAATGG |
|                  |                            |
| Pax2             | TGGCTGTGTTTTGAGAAGGGGATAC  |
| Pax2             | GTAGCCACCCCAAAAGTTGTAGAG   |
|                  |                            |
| Prospero         | AGCGATGGGGAGAGCACAATAG     |
| Prospero         | ATGGATACTCGGCACTGTTGGTGG   |
|                  |                            |
| Notch            | CGAGGTCCAGATGGTTTCACAC     |
| Notch            | CGACATTATTCACAGATGCTGCC    |
|                  |                            |
| Hes              | TTCCTCCACCAACAGCAACAAG     |
| Hes              | GACACATAGCAACCATTTGAAGCG   |
|                  |                            |
| Rhodopsin        | TGCGGTATTATTGGTTGTGTCG     |
| Rhodopsin        | CACGGAACTTAGGATGAGATACGG   |

| Prospero Sequences |              |                                                                             |                       |                                                                    |
|--------------------|--------------|-----------------------------------------------------------------------------|-----------------------|--------------------------------------------------------------------|
| Uniprot Entry      | Entry name   | Protein names                                                               | Gene names            | Organism                                                           |
| P34522             | HM26_CAEL    | Homeobox protein ceh-26                                                     | ceh-26 K12H4.1        | Caenorhabditis elegans                                             |
| K1RD84             | K1RD84_CRAGI | Homeobox protein prospero                                                   | CGI_10022026          | Crassostrea gigas (Pacific oyster) (Crassostrea angulata)          |
| T1FZP0             | T1FZP0_HELRO | Uncharacterized protein (Fragment)                                          | HELRODRAFT_69065      | Helobdella robusta (Californian leech)                             |
| T1G3T0             | T1G3T0_HELRO | Uncharacterized protein                                                     | HELRODRAFT_79761      | Helobdella robusta (Californian leech)                             |
| T1G8J3             | T1G8J3_HELRO | Uncharacterized protein                                                     | HELRODRAFT_92637      | Helobdella robusta (Californian leech)                             |
| V3ZWW3             | V3ZWW3_LOTGI | Uncharacterized protein                                                     | LOTGIDRAFT_183824     | Lottia gigantea (Giant owl limpet)                                 |
| P29617             | PROS_DROME   | Homeobox protein prospero                                                   | pros CG17228          | Drosophila melanogaster (Fruit fly)                                |
| D6WUC4             | D6WUC4_TRICA | Prospero                                                                    | pros TcasGA2_TC010596 | Tribolium castaneum (Red flour beetle)                             |
| F1QAE1             | F1QAE1_DANRE | Uncharacterized protein                                                     | prox1a                | Danio rerio (Zebrafish) (Brachydanio rerio)                        |
| D2DHG1             | D2DHG1_DANRE | Prospero-like protein Prox1b (Uncharacterized protein)                      | prox1b                | Danio rerio (Zebrafish) (Brachydanio rerio)                        |
| Q92786             | PROX1_HUMAN  | Prospero homeobox protein 1 (Homeobox prospero-like protein PROX1) (PROX-1) | PROX1                 | Homo sapiens (Human)                                               |
| P48437             | PROX1_MOUSE  | Prospero homeobox protein 1 (Homeobox prospero-like protein PROX1) (PROX-1) | Prox1                 | Mus musculus (Mouse)                                               |
| F1RDL6             | F1RDL6_DANRE | Uncharacterized protein                                                     | prox2                 | Danio rerio (Zebrafish) (Brachydanio rerio)                        |
| Q388N5             | PROX2_HUMAN  | Prospero homeobox protein 2 (Homeobox prospero-like protein PROX2) (PROX-2) | PROX2                 | Homo sapiens (Human)                                               |
| Q8BII1             | PROX2_MOUSE  | Prospero homeobox protein 2 (Homeobox prospero-like protein PROX2) (PROX-2) | Prox2                 | Mus musculus (Mouse)                                               |
| Q4H2W9             | Q4H2W9_CIOIN | Transcription factor protein (Uncharacterized protein) (Fragment)           | CI-Prox-A prox-a      | Ciona intestinalis (Transparent sea squirt) (Ascidia intestinalis) |
| Q4H2W8             | Q4H2W8_CIOIN | Transcription factor protein (Uncharacterized protein)                      | CI-Prox-B prox-b      | Ciona intestinalis (Transparent sea squirt) (Ascidia intestinalis) |
| W4YJMO             | W4YJMO_STRPU | Uncharacterized protein                                                     | Sp-Prox1              | Strongylocentrotus purpuratus (Purple sea urchin)                  |
| CAY12633           | C3W8S4_PLADU | Prospero related homeodomain protein                                        | Prox                  | Platynereis drumerillii                                            |
|                    |              |                                                                             |                       |                                                                    |

| Six Sequences |              |                                                                                                                                      |                               |                                                                    |
|---------------|--------------|--------------------------------------------------------------------------------------------------------------------------------------|-------------------------------|--------------------------------------------------------------------|
| Entry         | Entry name   | Protein names                                                                                                                        | Gene names                    | Organism                                                           |
| E9PGG2        | ANHX_HUMAN   | Anomalous homeobox protein                                                                                                           | ANHX                          | Homo sapiens (Human)                                               |
| Q23175        | HM32_CAEEL   | Homeobox protein ceh-32                                                                                                              | ceh-32 W05E10.3               | Caenorhabditis elegans                                             |
| Q94166        | HM33_CAEEL   | Homeobox protein ceh-33                                                                                                              | ceh-33 C10G8.7                | Caenorhabditis elegans                                             |
| Q94165        | HM34_CAEEL   | Homeobox protein ceh-34                                                                                                              | ceh-34 C10G8.6                | Caenorhabditis elegans                                             |
| T1G0W2        | T1G0W2_HELRO | Uncharacterized protein                                                                                                              | HELRODRAFT_72129              | Helobdella robusta (Californian leech)                             |
| T1G2I3        | T1G2I3_HELRO | Uncharacterized protein (Fragment)                                                                                                   | HELRODRAFT_76318              | Helobdella robusta (Californian leech)                             |
| T1G701        | T1G701_HELRO | Uncharacterized protein                                                                                                              | HELRODRAFT_88222              | Helobdella robusta (Californian leech)                             |
| T1G7F5        | T1G7F5_HELRO | Uncharacterized protein (Fragment)                                                                                                   | HELRODRAFT_89655              | Helobdella robusta (Californian leech)                             |
| T1G8C7        | T1G8C7_HELRO | Uncharacterized protein                                                                                                              | HELRODRAFT_92182              | Helobdella robusta (Californian leech)                             |
| T1EGZ9        | T1EGZ9_HELRO | Uncharacterized protein (Fragment)                                                                                                   | HELRODRAFT_124011             | Helobdella robusta (Californian leech)                             |
| T1EJ85        | T1EJ85_HELRO | Uncharacterized protein (Fragment)                                                                                                   | HELRODRAFT_142999             | Helobdella robusta (Californian leech)                             |
| T1EJC9        | T1EJC9_HELRO | Uncharacterized protein (Fragment)                                                                                                   | HELRODRAFT_143898             | Helobdella robusta (Californian leech)                             |
| T1FH69        | T1FH69_HELRO | Uncharacterized protein                                                                                                              | HELRODRAFT_181629             | Helobdella robusta (Californian leech)                             |
| T1FKB2        | T1FKB2_HELRO | Uncharacterized protein                                                                                                              | HELRODRAFT_183929             | Helobdella robusta (Californian leech)                             |
| V4AHM7        | V4AHM7_LOTGI | Uncharacterized protein                                                                                                              | LOTGIDRAFT_115798             | Lottia gigantea (Giant owl limpet)                                 |
| V3ZUB0        | V3ZUB0_LOTGI | Uncharacterized protein                                                                                                              | LOTGIDRAFT_129577             | Lottia gigantea (Giant owl limpet)                                 |
| V3ZSW5        | V3ZSW5_LOTGI | Uncharacterized protein                                                                                                              | LOTGIDRAFT_179424             | Lottia gigantea (Giant owl limpet)                                 |
| A9JPG3        | A9JPG3_TRICA | Optix protein (Sine oculis-related homeobox 3)                                                                                       | Optix optix TcasGA2_TC000361  | Tribolium castaneum (Red flour beetle)                             |
| K1P313        | K1P313_CRAGI | Protein sine oculis                                                                                                                  | CGI_10014640                  | Crassostrea gigas (Pacific oyster) (Crassostrea angulata)          |
| D6WIY0        | D6WIY0_TRICA | Sine oculis                                                                                                                          | So TcasGA2_TC030468           | Tribolium castaneum (Red flour beetle)                             |
| F6PRL5        | F6PRL5_CIOIN | Uncharacterized protein                                                                                                              | six45                         | Ciona intestinalis (Transparent sea squirt) (Ascidia intestinalis) |
| H2XLH4        | H2XLH4_CIOIN | Uncharacterized protein                                                                                                              | six12                         | Ciona intestinalis (Transparent sea squirt) (Ascidia intestinalis) |
| Q6DHF9        | SIX1A_DANRE  | Homeobox protein six1a (Homeobox protein six1b) (Sine oculis homeobox homolog 1) (Uncharacterized protein)                           | six1a six1b                   | Danio rerio (Zebrafish) (Brachydanio rerio)                        |
| Q6NZ04        | SIX1B_DANRE  | Homeobox protein six1b (Homeobox protein six1a) (Sine oculis homeobox homolog 1) (Uncharacterized protein)                           | six1b six1 six1a              | Danio rerio (Zebrafish) (Brachydanio rerio)                        |
| Q98TH1        | Q98TH1_DANRE | Homeobox protein six2.1 (Sine oculis homeobox homolog 2.1) (Six2.1 protein) (Uncharacterized protein)                                | six2a six2.1                  | Danio rerio (Zebrafish) (Brachydanio rerio)                        |
| F6VVA7        | F6VVA7_CIOIN | Uncharacterized protein (Fragment)                                                                                                   | six36                         | Ciona intestinalis (Transparent sea squirt) (Ascidia intestinalis) |
| Q6PCA5        | Q6PCA5_DANRE | Sine oculis homeobox homolog 3a (Uncharacterized protein)                                                                            | six3a                         | Danio rerio (Zebrafish) (Brachydanio rerio)                        |
| O73709        | O73709_DANRE | Homeobox protein Six6 (Sine oculis homeobox homolog 3b) (Six3) (Uncharacterized protein)                                             | six3b six3 six6               | Danio rerio (Zebrafish) (Brachydanio rerio)                        |
| A4IG26        | A4IG26_DANRE | Sine oculis homeobox homolog 4.2 (Uncharacterized protein)                                                                           | six4a six4.2                  | Danio rerio (Zebrafish) (Brachydanio rerio)                        |
| Q5TYZ4        | Q5TYZ4_DANRE | Uncharacterized protein                                                                                                              | six4b                         | Danio rerio (Zebrafish) (Brachydanio rerio)                        |
| G3V2N2        | G3V2N2_HUMAN | Homeobox protein SIX4 (Fragment)                                                                                                     | SIX4                          | Homo sapiens (Human)                                               |
| D6WFW3        | D6WFW3_TRICA | Sine oculis-related homeobox 4                                                                                                       | six4 TcasGA2_TC003852         | Tribolium castaneum (Red flour beetle)                             |
| F6NWW8        | F6NWW8_DANRE | Uncharacterized protein                                                                                                              | six5 six4.3                   | Danio rerio (Zebrafish) (Brachydanio rerio)                        |
| Q7T3G8        | Q7T3G8_DANRE | Sine oculis-related homeobox 6a (Uncharacterized protein)                                                                            | six6a                         | Danio rerio (Zebrafish) (Brachydanio rerio)                        |
| Q5TYZ2        | Q5TYZ2_DANRE | Sine oculis-related homeobox 6b (Uncharacterized protein)                                                                            | six6b                         | Danio rerio (Zebrafish) (Brachydanio rerio)                        |
| O93282        | O93282_DANRE | Homeobox protein Six7 (Sine oculis homeobox homolog 7) (Uncharacterized protein)                                                     | six7                          | Danio rerio (Zebrafish) (Brachydanio rerio)                        |
| F6PAI1        | F6PAI1_DANRE | Uncharacterized protein                                                                                                              | six9                          | Danio rerio (Zebrafish) (Brachydanio rerio)                        |
| K1PJH4        | K1PJH4_CRAGI | Homeobox protein SIX1                                                                                                                | CGI_10009922                  | Crassostrea gigas (Pacific oyster) (Crassostrea angulata)          |
| Q15475        | SIX1_HUMAN   | Homeobox protein SIX1 (Sine oculis homeobox homolog 1)                                                                               | SIX1                          | Homo sapiens (Human)                                               |
| Q62231        | SIX1_MOUSE   | Homeobox protein SIX1 (Sine oculis homeobox homolog 1)                                                                               | Six1                          | Mus musculus (Mouse)                                               |
| Q9NPC8        | SIX2_HUMAN   | Homeobox protein SIX2 (Sine oculis homeobox homolog 2)                                                                               | SIX2                          | Homo sapiens (Human)                                               |
| Q62232        | SIX2_MOUSE   | Homeobox protein SIX2 (Sine oculis homeobox homolog 2)                                                                               | Six2                          | Mus musculus (Mouse)                                               |
| K1QUB8        | K1QUB8_CRAGI | Homeobox protein SIX3                                                                                                                | CGI_10027570                  | Crassostrea gigas (Pacific oyster) (Crassostrea angulata)          |
| O95343        | SIX3_HUMAN   | Homeobox protein SIX3 (Sine oculis homeobox homolog 3)                                                                               | SIX3                          | Homo sapiens (Human)                                               |
| Q52KB8        | Q52KB8_MOUSE | Homeobox protein SIX3 (Six3 protein)                                                                                                 | Six3                          | Mus musculus (Mouse)                                               |
| K1RZ57        | K1RZ57_CRAGI | Homeobox protein SIX4                                                                                                                | CGI_10022945                  | Crassostrea gigas (Pacific oyster) (Crassostrea angulata)          |
| Q9UIU6        | SIX4_HUMAN   | Homeobox protein SIX4 (Sine oculis homeobox homolog 4)                                                                               | SIX4                          | Homo sapiens (Human)                                               |
| Q61321        | SIX4_MOUSE   | Homeobox protein SIX4 (Sine oculis homeobox homolog 4) (Skeletal muscle-specific)                                                    | Six4 Arec3                    | Mus musculus (Mouse)                                               |
| Q8N196        | SIX5_HUMAN   | Homeobox protein SIX5 (DM locus-associated homeodomain protein) (Sine oculis homeobox homolog 5) (Uncharacterized protein)           | SIX5 DMAHP                    | Homo sapiens (Human)                                               |
| P70178        | SIX5_MOUSE   | Homeobox protein SIX5 (DM locus-associated homeodomain protein homolog) (Sine oculis homeobox homolog 5) (Uncharacterized protein)   | Six5 Dmahp                    | Mus musculus (Mouse)                                               |
| O95475        | SIX6_HUMAN   | Homeobox protein SIX6 (Homeodomain protein OPTX2) (Optic homeobox 2) (Sine oculis homeobox homolog 6) (Uncharacterized protein)      | SIX6 OPTX2 SIX9               | Homo sapiens (Human)                                               |
| Q9QZ28        | SIX6_MOUSE   | Homeobox protein SIX6 (Optic homeobox 2) (Sine oculis homeobox homolog 6) (Sine oculis homeobox homolog 6) (Uncharacterized protein) | Six6 Optx2 Six9               | Mus musculus (Mouse)                                               |
| W4YNK2        | W4YNK2_STRPU | Uncharacterized protein                                                                                                              | Sp-Six1/2                     | Strongylocentrotus purpuratus (Purple sea urchin)                  |
| W4YNK3        | W4YNK3_STRPU | Uncharacterized protein                                                                                                              | Sp-Six4                       | Strongylocentrotus purpuratus (Purple sea urchin)                  |
| W4YSW9        | W4YSW9_STRPU | Uncharacterized protein                                                                                                              | Sp-Six3                       | Strongylocentrotus purpuratus (Purple sea urchin)                  |
| O17894        | O17894_CAEEL | F56A12.1                                                                                                                             | unc-39 CELE_F56A12.1 F56A12.1 | Caenorhabditis elegans                                             |
| A7SS98        | A7SS98_NEMVE | Predicted protein (Fragment)                                                                                                         | v1g56637                      | Nematostella vectensis (Starlet sea anemone)                       |
| A7S005        | A7S005_NEMVE | Predicted protein                                                                                                                    | v1g99489                      | Nematostella vectensis (Starlet sea anemone)                       |
| A7SPN4        | A7SPN4_NEMVE | Predicted protein                                                                                                                    | v1g126214                     | Nematostella vectensis (Starlet sea anemone)                       |
| A7ST96        | A7ST96_NEMVE | Predicted protein                                                                                                                    | v1g130873                     | Nematostella vectensis (Starlet sea anemone)                       |
| A7SZ27        | A7SZ27_NEMVE | Predicted protein (Fragment)                                                                                                         | v1g138693                     | Nematostella vectensis (Starlet sea anemone)                       |
| A7S425        | A7S425_NEMVE | Predicted protein                                                                                                                    | v1g206468                     | Nematostella vectensis (Starlet sea anemone)                       |
| V5NS22        | V5NS22_EUPSC | Six                                                                                                                                  |                               | Euprymna scolopes                                                  |

| <b>Pax Sequences</b> |                   |                                                                        |                                          |                                                                    |
|----------------------|-------------------|------------------------------------------------------------------------|------------------------------------------|--------------------------------------------------------------------|
| <b>Entry</b>         | <b>Entry name</b> | <b>Protein names</b>                                                   | <b>Gene names</b>                        | <b>Organism</b>                                                    |
| Q4H2Z5               | Q4H2Z5_CIOIN      | Transcription factor protein (Uncharacterized protein)                 | Ci-Pax1/9 pax1/9                         | Ciona intestinalis (Transparent sea squirt) (Ascidia intestinalis) |
| G5ED14               | G5ED14_CAEL       | C04G2.7 (PAX protein)                                                  | egl-38 C04G2.7 CELE_C04G2.7              | Caenorhabditis elegans                                             |
| Q9V7X7               | Q9V7X7_DROME      | Eyegone, isoform A (Eyegone, isoform B) (Eyegone, isoform C)           | eyg CG10488 Dmel_CG10488                 | Drosophila melanogaster (Fruit fly)                                |
| O01996               | O01996_CAEL       | Y53C12C.1                                                              | eyg-1 CELE_Y53C12C.1 Y53C12C.1           | Caenorhabditis elegans                                             |
| P09082               | GSB_DROME         | Protein gooseberry (BSH9) (Protein gooseberry distal)                  | gsb GSB-D GSB8 CG3388                    | Drosophila melanogaster (Fruit fly)                                |
| P09083               | GSBN_DROME        | Protein gooseberry-neuro (BSH4) (Protein gooseberry proximal)          | gsb-n Gsb-p GSBA CG2692                  | Drosophila melanogaster (Fruit fly)                                |
| V48BM7               | V48BM7_LOTGI      | Uncharacterized protein (Fragment)                                     | LOTGIDRAFT_69535                         | Lottia gigantea (Giant owl limpet)                                 |
| V32QV3               | V32QV3_LOTGI      | Uncharacterized protein (Fragment)                                     | LOTGIDRAFT_133720                        | Lottia gigantea (Giant owl limpet)                                 |
| V32I38               | V32I38_LOTGI      | Uncharacterized protein (Fragment)                                     | LOTGIDRAFT_135549                        | Lottia gigantea (Giant owl limpet)                                 |
| V4AMZ8               | V4AMZ8_LOTGI      | Uncharacterized protein (Fragment)                                     | LOTGIDRAFT_142778                        | Lottia gigantea (Giant owl limpet)                                 |
| V4A9T6               | V4A9T6_LOTGI      | Uncharacterized protein                                                | LOTGIDRAFT_161614                        | Lottia gigantea (Giant owl limpet)                                 |
| H2Y2B4               | H2Y2B4_CIOIN      | Uncharacterized protein                                                | pax1/9                                   | Ciona intestinalis (Transparent sea squirt) (Ascidia intestinalis) |
| F1QR4F               | F1QR4F_DANRE      | Uncharacterized protein                                                | pax1a                                    | Danio rerio (Zebrafish) (Brachydanio rerio)                        |
| F1QIW7               | F1QIW7_DANRE      | Uncharacterized protein (Fragment)                                     | pax1b                                    | Danio rerio (Zebrafish) (Brachydanio rerio)                        |
| Q21272               | Q21272_CAEL       | K07C11.1                                                               | pax-1 CELE_K07C11.1 K07C11.1             | Caenorhabditis elegans                                             |
| F6VTF7               | F6VTF7_CIOIN      | Uncharacterized protein                                                | pax2/5/8-b                               | Ciona intestinalis (Transparent sea squirt) (Ascidia intestinalis) |
| F1R139               | F1R139_DANRE      | Uncharacterized protein                                                | pax2b                                    | Danio rerio (Zebrafish) (Brachydanio rerio)                        |
| Q21263               | Q21263_CAEL       | K06B9.5a                                                               | pax-2 CELE_K06B9.5 K06B9.5               | Caenorhabditis elegans                                             |
| F6SH39               | F6SH39_CIOIN      | Uncharacterized protein                                                | pax3/7                                   | Ciona intestinalis (Transparent sea squirt) (Ascidia intestinalis) |
| F1Q950               | F1Q950_DANRE      | Uncharacterized protein (Fragment)                                     | pax3b                                    | Danio rerio (Zebrafish) (Brachydanio rerio)                        |
| G5ED66               | G5ED66_CAEL       | F27E5.2                                                                | pax-3 CELE_F27E5.2 F27E5.2               | Caenorhabditis elegans                                             |
| F1R840               | F1R840_DANRE      | Uncharacterized protein (Fragment)                                     | pax4                                     | Danio rerio (Zebrafish) (Brachydanio rerio)                        |
| E7FB46               | E7FB46_DANRE      | Uncharacterized protein                                                | pax5                                     | Danio rerio (Zebrafish) (Brachydanio rerio)                        |
| Q9YH28               | Q9YH28_DANRE      | Pax-family transcription factor 6.2 (Uncharacterized protein)          | pax6b pax6.2                             | Danio rerio (Zebrafish) (Brachydanio rerio)                        |
| F6PW95               | F6PW95_CIOIN      | Uncharacterized protein                                                | pax6                                     | Ciona intestinalis (Transparent sea squirt) (Ascidia intestinalis) |
| E7FOA6               | E7FOA6_DANRE      | Uncharacterized protein                                                | pax7a                                    | Danio rerio (Zebrafish) (Brachydanio rerio)                        |
| COM005               | COM005_DANRE      | Paired box protein 7b (Uncharacterized protein)                        | pax7b                                    | Danio rerio (Zebrafish) (Brachydanio rerio)                        |
| F1Q9Q9               | F1Q9Q9_DANRE      | Uncharacterized protein (Fragment)                                     | pax8                                     | Danio rerio (Zebrafish) (Brachydanio rerio)                        |
| Q98865               | Q98865_DANRE      | Pax9a (Uncharacterized protein)                                        | pax9 Pax9                                | Danio rerio (Zebrafish) (Brachydanio rerio)                        |
| O57416               | O57416_DANRE      | Transcription factor PAX3 (Uncharacterized protein)                    | pax3a pax3                               | Danio rerio (Zebrafish) (Brachydanio rerio)                        |
| P15863               | PAX1_HUMAN        | Paired box protein Pax-1 (HuP48)                                       | PAX1 HUP48                               | Homo sapiens (Human)                                               |
| P09084               | PAX1_MOUSE        | Paired box protein Pax-1                                               | Pax1 Pax-1                               | Mus musculus (Mouse)                                               |
| K1QYI7               | K1QYI7_CRAGI      | Paired box protein Pax-2-A                                             | CGI_10024166                             | Crassostrea gigas (Pacific oyster) (Crassostrea angulata)          |
| Q90268               | PAX2A_DANRE       | Paired box protein Pax-2a (No isthmus protein) (Pax[Zf-b])             | pax2a noi pax2.1 paxzf-b                 | Danio rerio (Zebrafish) (Brachydanio rerio)                        |
| Q02962               | PAX2_HUMAN        | Paired box protein Pax-2                                               | PAX2                                     | Homo sapiens (Human)                                               |
| P32114               | PAX2_MOUSE        | Paired box protein Pax-2                                               | Pax2 Pax-2                               | Mus musculus (Mouse)                                               |
| P23760               | PAX3_HUMAN        | Paired box protein Pax-3 (HuP2)                                        | PAX3 HUP2                                | Homo sapiens (Human)                                               |
| P24610               | PAX3_MOUSE        | Paired box protein Pax-3                                               | Pax3 Pax-3                               | Mus musculus (Mouse)                                               |
| O43316               | PAX4_HUMAN        | Paired box protein Pax-4                                               | PAX4                                     | Homo sapiens (Human)                                               |
| P32115               | PAX4_MOUSE        | Paired box protein Pax-4                                               | Pax4 Pax-4                               | Mus musculus (Mouse)                                               |
| Q02548               | PAX5_HUMAN        | Paired box protein Pax-5 (B-cell-specific transcription factor) (BSAP) | PAX5                                     | Homo sapiens (Human)                                               |
| Q02650               | PAX5_MOUSE        | Paired box protein Pax-5 (B-cell-specific transcription factor) (BSAP) | Pax5 Pax-5                               | Mus musculus (Mouse)                                               |
| K1QWY6               | K1QWY6_CRAGI      | Paired box protein Pax-6                                               | CGI_10020873                             | Crassostrea gigas (Pacific oyster) (Crassostrea angulata)          |
| K1QCD5               | K1QCD5_CRAGI      | Paired box protein Pax-6                                               | CGI_10027695                             | Crassostrea gigas (Pacific oyster) (Crassostrea angulata)          |
| P26630               | PAX6_DANRE        | Paired box protein Pax-6 (Pax[Zf-a])                                   | pax6a pax[zf-a] paxzf-a si:dkeyp-46c10.1 | Danio rerio (Zebrafish) (Brachydanio rerio)                        |
| O18381               | PAX6_DROME        | Paired box protein Pax-6 (Protein eyeless)                             | ey pax6 CG1464                           | Drosophila melanogaster (Fruit fly)                                |
| P26367               | PAX6_HUMAN        | Paired box protein Pax-6 (Aniridia type II protein) (Oculorhombin)     | PAX6 AN2                                 | Homo sapiens (Human)                                               |
| P63015               | PAX6_MOUSE        | Paired box protein Pax-6 (Oculorhombin)                                | Pax6 Pax-6 Sey                           | Mus musculus (Mouse)                                               |
| K1RJL2               | K1RJL2_CRAGI      | Paired box protein Pax-7                                               | CGI_10026438                             | Crassostrea gigas (Pacific oyster) (Crassostrea angulata)          |
| P23759               | PAX7_HUMAN        | Paired box protein Pax-7 (HuP1)                                        | PAX7 HUP1                                | Homo sapiens (Human)                                               |
| P47239               | PAX7_MOUSE        | Paired box protein Pax-7                                               | Pax7 Pax-7                               | Mus musculus (Mouse)                                               |
| K1R993               | K1R993_CRAGI      | Paired box protein Pax-8                                               | CGI_10012686                             | Crassostrea gigas (Pacific oyster) (Crassostrea angulata)          |
| Q06710               | PAX8_HUMAN        | Paired box protein Pax-8                                               | PAX8                                     | Homo sapiens (Human)                                               |
| Q00288               | PAX8_MOUSE        | Paired box protein Pax-8                                               | Pax8 Pax-8                               | Mus musculus (Mouse)                                               |
| P55771               | PAX9_HUMAN        | Paired box protein Pax-9                                               | PAX9                                     | Homo sapiens (Human)                                               |
| P47242               | PAX9_MOUSE        | Paired box protein Pax-9                                               | Pax9 Pax-9                               | Mus musculus (Mouse)                                               |
| P23757               | POXM_DROME        | Paired box pox-meso protein (Paired box mesodermal protein)            | Poxm POX-M CG9610                        | Drosophila melanogaster (Fruit fly)                                |
| P23758               | POXN_DROME        | Paired box pox-neuro protein (Paired box neuronal protein)             | Poxn pox-n CG8246                        | Drosophila melanogaster (Fruit fly)                                |
| P06601               | PRD_DROME         | Segmentation protein paired                                            | prd CG6716                               | Drosophila melanogaster (Fruit fly)                                |
| O16117               | O16117_DROME      | Shaven, isoform A (Sparkling protein)                                  | sv spa CG11049 Dmel_CG11049              | Drosophila melanogaster (Fruit fly)                                |
| Q8TOM4               | Q8TOM4_DROME      | CG10704-PA (GH22493p)                                                  | toe CG10704 Dmel_CG10704                 | Drosophila melanogaster (Fruit fly)                                |
| Q9V490               | Q9V490_DROME      | GH14454p (Twin of eyeless, isoform A)                                  | toy CG11186 Dmel_CG11186                 | Drosophila melanogaster (Fruit fly)                                |
| G5ED51               | G5ED51_CAEL       | F14F3.1a (Variable abnormal-3)                                         | vab-3 CELE_F14F3.1 F14F3.1               | Caenorhabditis elegans                                             |
| Q8MUR8               | Q8MUR8_EUPSC      | Pax6                                                                   |                                          | Euprymna scolopes                                                  |



| Hes Sequences |              |                                                                                        |                                       |                                                                    |
|---------------|--------------|----------------------------------------------------------------------------------------|---------------------------------------|--------------------------------------------------------------------|
| Entry         | Entry name   | Protein names                                                                          |                                       | Gene names                                                         |
| A3KQ56        | A3KQ56_DANRE | Her1 protein (Uncharacterized protein)                                                 | her1                                  | Danio rerio (Zebrafish) (Brachydanio rerio)                        |
| O14503        | BHE40_HUMAN  | Class E basic helix-loop-helix protein 40 (bHLHe40) (Class B basic helix-loop-helix pr | BHLHE40 BHLHB2 DEC1 SHARP2 STRA13     | Homo sapiens (Human)                                               |
| O35185        | BHE40_MOUSE  | Class E basic helix-loop-helix protein 40 (bHLHe40) (Class B basic helix-loop-helix pr | Bhlhe40 Bhlhb2 Clast5 Stra13          | Mus musculus (Mouse)                                               |
| Q9C0J9        | BHE41_HUMAN  | Class E basic helix-loop-helix protein 41 (bHLHe41) (Class B basic helix-loop-helix pr | BHLHE41 BHLHB3 DEC2 SHARP1            | Homo sapiens (Human)                                               |
| Q99PV5        | BHE41_MOUSE  | Class E basic helix-loop-helix protein 41 (bHLHe41) (Class B basic helix-loop-helix pr | Bhlhe41 Bhlhb3 Dec2                   | Mus musculus (Mouse)                                               |
| Q26263        | DPN_DROME    | Protein deadpan                                                                        | dpn CG8704                            | Drosophila melanogaster (Fruit fly)                                |
| P13097        | ESM7_DROME   | Enhancer of split m7 protein (E(spl)m7)                                                | HLHm7 CG8361                          | Drosophila melanogaster (Fruit fly)                                |
| P13098        | ESM8_DROME   | Enhancer of split m8 protein (E(spl)m8)                                                | E(spl) m8 CG8365                      | Drosophila melanogaster (Fruit fly)                                |
| Q01069        | ESMB_DROME   | Enhancer of split mbeta protein (E(spl)mbeta) (HLH-mbeta) (Split locus enhancer p      | HLHmbeta CG14548                      | Drosophila melanogaster (Fruit fly)                                |
| Q01070        | ESMC_DROME   | Enhancer of split mgamma protein (E(spl)mgamma) (Split locus enhancer protein n        | HLHmgamma CG8333                      | Drosophila melanogaster (Fruit fly)                                |
| Q01071        | ESMD_DROME   | Enhancer of split mdelta protein (E(spl)mdelta) (HLH-mdelta) (Split locus enhancer     | HLHmdelta CG8328                      | Drosophila melanogaster (Fruit fly)                                |
| F1Q965        | F1Q965_DANRE | Uncharacterized protein (Fragment)                                                     | her8.2                                | Danio rerio (Zebrafish) (Brachydanio rerio)                        |
| F1QJ81        | F1QJ81_DANRE | Uncharacterized protein (Fragment)                                                     | her8a                                 | Danio rerio (Zebrafish) (Brachydanio rerio)                        |
| F1RDU0        | F1RDU0_DANRE | Uncharacterized protein (Fragment)                                                     | her3                                  | Danio rerio (Zebrafish) (Brachydanio rerio)                        |
| F6QRK3        | F6QRK3_CIOIN | Uncharacterized protein (Fragment)                                                     | hey                                   | Ciona intestinalis (Transparent sea squirt) (Ascidia intestinalis) |
| F6TXK6        | F6TXK6_CIOIN | Uncharacterized protein                                                                | e(spl)/hair-y-b                       | Ciona intestinalis (Transparent sea squirt) (Ascidia intestinalis) |
| F7A592        | F7A592_CIOIN | Uncharacterized protein                                                                | e(spl)/hair-y-c                       | Ciona intestinalis (Transparent sea squirt) (Ascidia intestinalis) |
| P14003        | HAIR_DROME   | Protein hairy                                                                          | h CG6494                              | Drosophila melanogaster (Fruit fly)                                |
| Q6QB00        | HELT_DANRE   | Hairy and enhancer of split-related protein helt (HES/HEY-like transcription factor)   | helt zgc:109704                       | Danio rerio (Zebrafish) (Brachydanio rerio)                        |
| A6NFD8        | HELT_HUMAN   | Hairy and enhancer of split-related protein HELT (HES/HEY-like transcription factor    | HELT                                  | Homo sapiens (Human)                                               |
| Q7TS99        | HELT_MOUSE   | Hairy and enhancer of split-related protein HELT (HES/HEY-like transcription factor    | Helt Hes1 Mgn                         | Mus musculus (Mouse)                                               |
| Q14469        | HES1_HUMAN   | Transcription factor HES-1 (Class B basic helix-loop-helix protein 39) (bHLHB39) (Ha   | HES1 BHLHB39 HL HRY                   | Homo sapiens (Human)                                               |
| P35428        | HES1_MOUSE   | Transcription factor HES-1 (Hairy and enhancer of split 1)                             | Hes1 Hes-1                            | Mus musculus (Mouse)                                               |
| Q9Y543        | HES2_HUMAN   | Transcription factor HES-2 (Class B basic helix-loop-helix protein 40) (bHLHB40) (Ha   | HES2 BHLHB40                          | Homo sapiens (Human)                                               |
| O54792        | HES2_MOUSE   | Transcription factor HES-2 (Hairy and enhancer of split 2)                             | Hes2                                  | Mus musculus (Mouse)                                               |
| Q9HCC6        | HES4_HUMAN   | Transcription factor HES-4 (hHES4) (Class B basic helix-loop-helix protein 42) (bHLH   | HES4 BHLHB42                          | Homo sapiens (Human)                                               |
| Q5TA89        | HES5_HUMAN   | Transcription factor HES-5 (Class B basic helix-loop-helix protein 38) (bHLHB38) (Ha   | HES5 BHLHB38                          | Homo sapiens (Human)                                               |
| P70120        | HES5_MOUSE   | Transcription factor HES-5 (Hairy and enhancer of split 5)                             | Hes5 Hes-5                            | Mus musculus (Mouse)                                               |
| Q8AXV6        | HEY1_DANRE   | Hairy/enhancer-of-split related with YRPW motif protein 1                              | hey1                                  | Danio rerio (Zebrafish) (Brachydanio rerio)                        |
| Q9Y5J3        | HEY1_HUMAN   | Hairy/enhancer-of-split related with YRPW motif protein 1 (Cardiovascular helix-lo     | HEY1 BHLHB31 CHF2 HERP2 HESR1 HRT1    | Homo sapiens (Human)                                               |
| Q9WV93        | HEY1_MOUSE   | Hairy/enhancer-of-split related with YRPW motif protein 1 (Hairy and enhancer of       | Hey1 Herp2 Hesr1 Hrt1                 | Mus musculus (Mouse)                                               |
| Q9I9L0        | HEY2_DANRE   | Hairy/enhancer-of-split related with YRPW motif protein 2 (Protein gridlock)           | hey2 grl zgc:136746                   | Danio rerio (Zebrafish) (Brachydanio rerio)                        |
| Q9UBP5        | HEY2_HUMAN   | Hairy/enhancer-of-split related with YRPW motif protein 2 (Cardiovascular helix-lo     | HEY2 BHLHB32 CHF1 GRL HERP HERP1 HRT2 | Homo sapiens (Human)                                               |
| Q9QUS4        | HEY2_MOUSE   | Hairy/enhancer-of-split related with YRPW motif protein 2 (HES-related repressor       | Hey2 Chf1 Herp Herp1 Hesr2 Hrt2       | Mus musculus (Mouse)                                               |
| Q7KM13        | HEY_DROME    | Hairy/enhancer-of-split related with YRPW motif protein                                | Hey Hesr-1 CG11194                    | Drosophila melanogaster (Fruit fly)                                |
| Q8AXV5        | HEYL_DANRE   | Hairy/enhancer-of-split related with YRPW motif-like protein                           | hey1 si:dkey-148n22.1                 | Danio rerio (Zebrafish) (Brachydanio rerio)                        |
| Q9NQ87        | HEYL_HUMAN   | Hairy/enhancer-of-split related with YRPW motif-like protein (hHeyL) (Class B basic    | HEYL BHLHB33 HRT3                     | Homo sapiens (Human)                                               |
| Q9DBX7        | HEYL_MOUSE   | Hairy/enhancer-of-split related with YRPW motif-like protein (Hairy and enhancer of    | Heyl Hesr3 Hrt3                       | Mus musculus (Mouse)                                               |
| K1PP05        | K1PP05_CRAGI | Transcription factor HES-1-B                                                           | CGI_10019616                          | Crassostrea gigas (Pacific oyster) (Crassostrea angulata)          |
| K1P292        | K1P292_CRAGI | Transcription factor HES-1                                                             | CGI_10014039                          | Crassostrea gigas (Pacific oyster) (Crassostrea angulata)          |
| K1QKA1        | K1QKA1_CRAGI | Hairy/enhancer-of-split related with YRPW motif protein 1                              | CGI_10018323                          | Crassostrea gigas (Pacific oyster) (Crassostrea angulata)          |
| K1QQK8        | K1QQK8_CRAGI | Hairy and enhancer of split-related protein HELT                                       | CGI_10022440                          | Crassostrea gigas (Pacific oyster) (Crassostrea angulata)          |
| K1R9L1        | K1R9L1_CRAGI | Transcription factor HES-1                                                             | CGI_10017446                          | Crassostrea gigas (Pacific oyster) (Crassostrea angulata)          |
| Q9VGZ5        | Q9VGZ5_DROME | Clockwork orange, isoform A                                                            | cwo CG17100 Dmel_CG17100              | Drosophila melanogaster (Fruit fly)                                |
| Q9V1J6        | Q9V1J6_DROME | CG10446-PA (GH26014p)                                                                  | Side CG10446 Dmel_CG10446             | Drosophila melanogaster (Fruit fly)                                |
| V3Z2B4        | V3Z2B4_LOTGI | Uncharacterized protein                                                                | LOTGIDRAFT_168397                     | Lottia gigantea (Giant owl limpet)                                 |
| V3ZJE0        | V3ZJE0_LOTGI | Uncharacterized protein                                                                | LOTGIDRAFT_209713                     | Lottia gigantea (Giant owl limpet)                                 |
| V3ZUW0        | V3ZUW0_LOTGI | Uncharacterized protein                                                                | LOTGIDRAFT_168395                     | Lottia gigantea (Giant owl limpet)                                 |
| V4A3Y9        | V4A3Y9_LOTGI | Uncharacterized protein (Fragment)                                                     | LOTGIDRAFT_74634                      | Lottia gigantea (Giant owl limpet)                                 |
| V4ADJ5        | V4ADJ5_LOTGI | Uncharacterized protein                                                                | LOTGIDRAFT_153818                     | Lottia gigantea (Giant owl limpet)                                 |
| V4ALY1        | V4ALY1_LOTGI | Uncharacterized protein (Fragment)                                                     | LOTGIDRAFT_116653                     | Lottia gigantea (Giant owl limpet)                                 |
| V4AWV7        | V4AWV7_LOTGI | Uncharacterized protein (Fragment)                                                     | LOTGIDRAFT_67089                      | Lottia gigantea (Giant owl limpet)                                 |
| V4BA37        | V4BA37_LOTGI | Uncharacterized protein                                                                | LOTGIDRAFT_171867                     | Lottia gigantea (Giant owl limpet)                                 |
| V4CNC5        | V4CNC5_LOTGI | Uncharacterized protein (Fragment)                                                     | LOTGIDRAFT_97309                      | Lottia gigantea (Giant owl limpet)                                 |
| W4XTR1        | W4XTR1_STRPU | Uncharacterized protein                                                                | Sp-Hairy                              | Strongylocentrotus purpuratus (Purple sea urchin)                  |
| W4XTR2        | W4XTR2_STRPU | Uncharacterized protein                                                                | Sp-Hairy2/4                           | Strongylocentrotus purpuratus (Purple sea urchin)                  |
| W4Y187        | W4Y187_STRPU | Uncharacterized protein                                                                | Sp-Hey                                | Strongylocentrotus purpuratus (Purple sea urchin)                  |
| W4YIV6        | W4YIV6_STRPU | Uncharacterized protein                                                                | Sp-Hey4                               | Strongylocentrotus purpuratus (Purple sea urchin)                  |
| W4ZOH3        | W4ZOH3_STRPU | Uncharacterized protein                                                                | Sp-HesC                               | Strongylocentrotus purpuratus (Purple sea urchin)                  |
|               |              |                                                                                        |                                       |                                                                    |
|               |              |                                                                                        |                                       |                                                                    |

| Eya Sequences |              |                                                                                    |                                              |                                                                    |
|---------------|--------------|------------------------------------------------------------------------------------|----------------------------------------------|--------------------------------------------------------------------|
| Entry         | Entry name   | Protein names                                                                      | Gene names                                   | Organism                                                           |
| A9VB82        | A9VB82_MONBE | Predicted protein                                                                  | 29484                                        | Monosiga brevicollis (Choanoflagellate)                            |
| A8J031        | A8J031_CHLRE | Predicted protein                                                                  | CHLREDRAFT_191069                            | Chlamydomonas reinhardtii (Chlamydomonas smithii)                  |
| P97480        | EYA3_MOUSE   | Eyes absent homolog 3 (EC 3.1.3.48)                                                | Eya3                                         | Mus musculus (Mouse)                                               |
| O08575        | EYA2_MOUSE   | Eyes absent homolog 2 (EC 3.1.3.48)                                                | Eya2 Eab1                                    | Mus musculus (Mouse)                                               |
| Q9Z191        | EYA4_MOUSE   | Eyes absent homolog 4 (EC 3.1.3.48)                                                | Eya4                                         | Mus musculus (Mouse)                                               |
| O82162        | O82162_ARATH | At2g35320/T4C15.1 (EYA-like protein) (Similar to eyes absent protein) (Tyrosine-sp | EYA At2g35320 At2g35320/T4C15.1              | Arabidopsis thaliana (Mouse-ear cress)                             |
| O17670        | O17670_CAEL  | Eyes absent homolog (EC 3.1.3.48)                                                  | eya-1 C49A1.4 CELE_C49A1.4                   | Caenorhabditis elegans                                             |
| F6HTB0        | F6HTB0_VITVI | Putative uncharacterized protein                                                   | VIT_02s0012g01000                            | Vitis vinifera (Grape)                                             |
| F6UD40        | F6UD40_CIOIN | Eyes absent homolog (EC 3.1.3.48)                                                  | LOC101243276                                 | Ciona intestinalis (Transparent sea squirt) (Ascidia intestinalis) |
| O95677        | EYA4_HUMAN   | Eyes absent homolog 4 (EC 3.1.3.48)                                                | EYA4                                         | Homo sapiens (Human)                                               |
| D0MQA0        | D0MQA0_PHYIT | Eyes absent family protein                                                         | PITG_00231                                   | Phytophthora infestans (strain T30-4) (Potato late blight fungus)  |
| C3Y1E5        | C3Y1E5_BRAFL | Eyes absent homolog (EC 3.1.3.48)                                                  | BRAFLDRAFT_83679                             | Branchiostoma floridae (Florida lancelet) (Amphioxus)              |
| A8XU56        | A8XU56_CAEBR | Eyes absent homolog (EC 3.1.3.48)                                                  | eya-1 Cbr-eya-1 cbr-eya-1 CBG18807 CBG_18807 | Caenorhabditis briggsae                                            |
| A7SG20        | A7SG20_NEMVE | Eyes absent homolog (EC 3.1.3.48) (Fragment)                                       | v1g116873                                    | Nematostella vectensis (Starlet sea anemone)                       |
| O00167        | EYA2_HUMAN   | Eyes absent homolog 2 (EC 3.1.3.48)                                                | EYA2 EAB1                                    | Homo sapiens (Human)                                               |
| Q05201        | EYA_DROME    | Developmental protein eyes absent (EC 3.1.3.48) (Protein Clift)                    | eya cli CG9554                               | Drosophila melanogaster (Fruit fly)                                |
| Q99504        | EYA3_HUMAN   | Eyes absent homolog 3 (EC 3.1.3.48)                                                | EYA3                                         | Homo sapiens (Human)                                               |
| A3KQ54        | A3KQ54_DANRE | Eyes absent homolog (EC 3.1.3.48)                                                  | eya3                                         | Danio rerio (Zebrafish) (Brachydanio rerio)                        |
| Q66HX1        | Q66HX1_DANRE | Eyes absent homolog (EC 3.1.3.48)                                                  | eya2 zgc:92279                               | Danio rerio (Zebrafish) (Brachydanio rerio)                        |
| C5YZG4        | C5YZG4_SORBI | Putative uncharacterized protein Sb09g002540                                       | Sb09g002540 SORBIIDRAFT_09g002540            | Sorghum bicolor (Sorghum) (Sorghum vulgare)                        |
| I1H1W7        | I1H1W7_BRADI | Uncharacterized protein                                                            | BRADI1G51790                                 | Brachypodium distachyon (Purple false brome) (Trachynia distachya) |
| P97767        | EYA1_MOUSE   | Eyes absent homolog 1 (EC 3.1.3.16) (EC 3.1.3.48)                                  | Eya1                                         | Mus musculus (Mouse)                                               |
| B3S2N8        | B3S2N8_TRIAD | Eyes absent homolog (EC 3.1.3.48)                                                  | TRIADDRAFT_58093                             | Trichoplax adhaerens (Trichoplax reptans)                          |
| E9QGF5        | E9QGF5_DANRE | Eyes absent homolog (EC 3.1.3.48)                                                  | eya4                                         | Danio rerio (Zebrafish) (Brachydanio rerio)                        |
| Q99502        | EYA1_HUMAN   | Eyes absent homolog 1 (EC 3.1.3.16) (EC 3.1.3.48)                                  | EYA1                                         | Homo sapiens (Human)                                               |
| F1QNU4        | F1QNU4_DANRE | Eyes absent homolog (EC 3.1.3.48)                                                  | eya1                                         | Danio rerio (Zebrafish) (Brachydanio rerio)                        |
| W4YDN9        | W4YDN9_STRPU | Eyes absent homolog (EC 3.1.3.48)                                                  | Sp-Eya                                       | Strongylocentrotus purpuratus (Purple sea urchin)                  |
| G4VPW6        | G4VPW6_SCHMA | Eyes absent homolog (EC 3.1.3.48)                                                  | Smp_173090                                   | Schistosoma mansoni (Blood fluke)                                  |
| V5NSK2        | V5NSK2_EUPSC | Eyes absent homolog                                                                |                                              | Euprymna scolopes                                                  |
| Q7Q8A3        | Q7Q8A3_ANOGA | Eyes absent homolog (EC 3.1.3.48) (Fragment)                                       | AgaP_AGAP008726                              | Anopheles gambiae (African malaria mosquito)                       |
| V5NSK2        | V5NSK2_EUPSC | Eyes absent homolog                                                                |                                              | Euprymna scolopes                                                  |
|               |              |                                                                                    |                                              |                                                                    |



| Notch Sequences |              |                                                                                        |                                           |                                                                    |
|-----------------|--------------|----------------------------------------------------------------------------------------|-------------------------------------------|--------------------------------------------------------------------|
| Entry           | Entry name   | Protein names                                                                          | Gene names                                | Organism                                                           |
| O35185          | BHE40_MOUSE  | Class E basic helix-loop-helix protein 40 (bHLHe40) (Class B basic helix-loop-helix pr | Bhlhe40 Bhlhb2 Clast5 Stra13              | Mus musculus (Mouse)                                               |
| Q99PV5          | BHE41_MOUSE  | Class E basic helix-loop-helix protein 41 (bHLHe41) (Class B basic helix-loop-helix pr | Bhlhe41 Bhlhb3 Dec2                       | Mus musculus (Mouse)                                               |
| O14503          | BHE40_HUMAN  | Class E basic helix-loop-helix protein 40 (bHLHe40) (Class B basic helix-loop-helix pr | BHLHE40 BHLHB2 DEC1 SHARP2 STRA13         | Homo sapiens (Human)                                               |
| Q9C0J9          | BHE41_HUMAN  | Class E basic helix-loop-helix protein 41 (bHLHe41) (Class B basic helix-loop-helix pr | BHLHE41 BHLHB3 DEC2 SHARP1                | Homo sapiens (Human)                                               |
| A1Z757          | A1Z757_DROME | CG8027 (EC 2.7.-.-) (F102838p)                                                         | CG8027-RA CG8027 Dmel_CG8027              | Drosophila melanogaster (Fruit fly)                                |
| Q9VGZ5          | Q9VGZ5_DROME | Clockwork orange, isoform A                                                            | cwo CG17100 Dmel_CG17100                  | Drosophila melanogaster (Fruit fly)                                |
| Q26263          | DPN_DROME    | Protein deadpan                                                                        | dpn CG8704                                | Drosophila melanogaster (Fruit fly)                                |
| Q6NY50          | Q6NY50_DANRE | BHLH protein DEC1 (Bhlhe40 protein) (Uncharacterized protein)                          | bhlhe40 bhlhb2 DEC1                       | Danio rerio (Zebrafish) (Brachydanio rerio)                        |
| Q2PGD2          | Q2PGD2_DANRE | BHLH protein DEC2 (Basic helix-loop-helix domain containing, class B, 3 like) (Dec2)   | bhlhe41 bhlhb3l DEC2 DKEY-66C4.5-001      | Danio rerio (Zebrafish) (Brachydanio rerio)                        |
| F6ZDG1          | F6ZDG1_CIOIN | Uncharacterized protein (Fragment)                                                     |                                           | Ciona intestinalis (Transparent sea squirt) (Ascidia intestinalis) |
| F7AFG0          | F7AFG0_CIOIN | Uncharacterized protein (Fragment)                                                     |                                           | Ciona intestinalis (Transparent sea squirt) (Ascidia intestinalis) |
| F7AFG7          | F7AFG7_CIOIN | Uncharacterized protein (Fragment)                                                     |                                           | Ciona intestinalis (Transparent sea squirt) (Ascidia intestinalis) |
| F7AZ47          | F7AZ47_CIOIN | Uncharacterized protein                                                                | n                                         | Ciona intestinalis (Transparent sea squirt) (Ascidia intestinalis) |
| K1PK27          | K1PK27_CRAGI | N-acetylglucosamine-1-phosphotransferase subunits alpha/beta                           | CGI_10013374                              | Crassostrea gigas (Pacific oyster) (Crassostrea angulata)          |
| Q5RGJ8          | GNPTA_DANRE  | N-acetylglucosamine-1-phosphotransferase subunits alpha/beta (EC 2.7.8.17) (GlcT       | gnptab gnpta si:ch211-234f20.3 zgc:122985 | Danio rerio (Zebrafish) (Brachydanio rerio)                        |
| Q69ZN6          | GNPTA_MOUSE  | N-acetylglucosamine-1-phosphotransferase subunits alpha/beta (EC 2.7.8.17) (GlcT       | Gnptab Gnpta Kiaa1208                     | Mus musculus (Mouse)                                               |
| Q3T906          | GNPTA_HUMAN  | N-acetylglucosamine-1-phosphotransferase subunits alpha/beta (EC 2.7.8.17) (GlcT       | GNPTAB GNPTA KIAA1208                     | Homo sapiens (Human)                                               |
| T1G0U1          | T1G0U1_HELRO | Uncharacterized protein                                                                | HELRODRAFT_72015                          | Helobdella robusta (Californian leech)                             |
| T1G236          | T1G236_HELRO | Uncharacterized protein                                                                | HELRODRAFT_75318                          | Helobdella robusta (Californian leech)                             |
| T1G620          | T1G620_HELRO | Uncharacterized protein                                                                | HELRODRAFT_85704                          | Helobdella robusta (Californian leech)                             |
| T1G9M2          | T1G9M2_HELRO | Uncharacterized protein                                                                | HELRODRAFT_98385                          | Helobdella robusta (Californian leech)                             |
| T1FLN6          | T1FLN6_HELRO | Uncharacterized protein                                                                | HELRODRAFT_184646                         | Helobdella robusta (Californian leech)                             |
| V4AWV7          | V4AWV7_LOTGI | Uncharacterized protein (Fragment)                                                     | LOTGIDRAFT_67089                          | Lottia gigantea (Giant owl limpet)                                 |
| V4A3Y9          | V4A3Y9_LOTGI | Uncharacterized protein (Fragment)                                                     | LOTGIDRAFT_74634                          | Lottia gigantea (Giant owl limpet)                                 |
| V4CNC5          | V4CNC5_LOTGI | Uncharacterized protein (Fragment)                                                     | LOTGIDRAFT_97309                          | Lottia gigantea (Giant owl limpet)                                 |
| V4ALY1          | V4ALY1_LOTGI | Uncharacterized protein (Fragment)                                                     | LOTGIDRAFT_116653                         | Lottia gigantea (Giant owl limpet)                                 |
| V4ADJ5          | V4ADJ5_LOTGI | Uncharacterized protein                                                                | LOTGIDRAFT_153818                         | Lottia gigantea (Giant owl limpet)                                 |
| V3ZUW0          | V3ZUW0_LOTGI | Uncharacterized protein                                                                | LOTGIDRAFT_168395                         | Lottia gigantea (Giant owl limpet)                                 |
| V3Z2B4          | V3Z2B4_LOTGI | Uncharacterized protein                                                                | LOTGIDRAFT_168397                         | Lottia gigantea (Giant owl limpet)                                 |
| V4BA37          | V4BA37_LOTGI | Uncharacterized protein                                                                | LOTGIDRAFT_171867                         | Lottia gigantea (Giant owl limpet)                                 |
| V4BGJ2          | V4BGJ2_LOTGI | Uncharacterized protein (Fragment)                                                     | LOTGIDRAFT_184955                         | Lottia gigantea (Giant owl limpet)                                 |
| V3ZJEO          | V3ZJEO_LOTGI | Uncharacterized protein                                                                | LOTGIDRAFT_209713                         | Lottia gigantea (Giant owl limpet)                                 |
| V4AQQ8          | V4AQQ8_LOTGI | Uncharacterized protein                                                                | LOTGIDRAFT_238796                         | Lottia gigantea (Giant owl limpet)                                 |
| F1QCA7          | F1QCA7_DANRE | Uncharacterized protein                                                                | notch1b                                   | Danio rerio (Zebrafish) (Brachydanio rerio)                        |
| P46530          | NOTC1_DANRE  | Neurogenic locus notch homolog protein 1 (Notch 1) [Cleaved into: Notch 1 extrac       | notch1a notch                             | Danio rerio (Zebrafish) (Brachydanio rerio)                        |
| Q01705          | NOTC1_MOUSE  | Neurogenic locus notch homolog protein 1 (Notch 1) (Motch A) (mT14) (p300) [Cle        | Notch1 Motch                              | Mus musculus (Mouse)                                               |
| F1R9H8          | F1R9H8_DANRE | Uncharacterized protein                                                                | notch2                                    | Danio rerio (Zebrafish) (Brachydanio rerio)                        |
| O35516          | NOTC2_MOUSE  | Neurogenic locus notch homolog protein 2 (Notch 2) (Motch B) [Cleaved into: Notc       | Notch2                                    | Mus musculus (Mouse)                                               |
| F1QZF2          | F1QZF2_DANRE | Uncharacterized protein                                                                | notch3                                    | Danio rerio (Zebrafish) (Brachydanio rerio)                        |
| Q61982          | NOTC3_MOUSE  | Neurogenic locus notch homolog protein 3 (Notch 3) [Cleaved into: Notch 3 extrac       | Notch3                                    | Mus musculus (Mouse)                                               |
| P31695          | NOTC4_MOUSE  | Neurogenic locus notch homolog protein 4 (Notch 4) [Cleaved into: Transforming p       | Notch4 Int-3 Int3                         | Mus musculus (Mouse)                                               |
| P46531          | NOTC1_HUMAN  | Neurogenic locus notch homolog protein 1 (Notch 1) (hN1) (Translocation-associat       | NOTCH1 TAN1                               | Homo sapiens (Human)                                               |
| Q04721          | NOTC2_HUMAN  | Neurogenic locus notch homolog protein 2 (Notch 2) (hN2) [Cleaved into: Notch 2        | NOTCH2                                    | Homo sapiens (Human)                                               |
| Q9UM47          | NOTC3_HUMAN  | Neurogenic locus notch homolog protein 3 (Notch 3) [Cleaved into: Notch 3 extrac       | NOTCH3                                    | Homo sapiens (Human)                                               |
| Q99466          | NOTC4_HUMAN  | Neurogenic locus notch homolog protein 4 (Notch 4) (hNotch4) [Cleaved into: Notc       | NOTCH4 INT3                               | Homo sapiens (Human)                                               |
| K1S0U1          | K1S0U1_CRAGI | Neurogenic locus Notch protein                                                         | CGI_10004834                              | Crassostrea gigas (Pacific oyster) (Crassostrea angulata)          |
| K1PPU8          | K1PPU8_CRAGI | Neurogenic locus Notch protein                                                         | CGI_10013186                              | Crassostrea gigas (Pacific oyster) (Crassostrea angulata)          |
| P07207          | NOTCH_DROME  | Neurogenic locus Notch protein [Cleaved into: Processed neurogenic locus Notch p       | N CG3936                                  | Drosophila melanogaster (Fruit fly)                                |
| X1WEZ2          | X1WEZ2_DANRE | Uncharacterized protein                                                                | notchl                                    | Danio rerio (Zebrafish) (Brachydanio rerio)                        |
| Q9VJ16          | Q9VJ16_DROME | CG10446-PA (GH26014p)                                                                  | Side CG10446 Dmel_CG10446                 | Drosophila melanogaster (Fruit fly)                                |
| W4YEF0          | W4YEF0_STRPU | Uncharacterized protein                                                                | Sp-Notch                                  | Strongylocentrotus purpuratus (Purple sea urchin)                  |
